# Supplementary material for: Sources and formation of carbonaceous aerosols in Xi'an, China: primary emissions and secondary formation constrained by radiocarbon
Source: Copernicus journal article supplement (doi:10.5194/acp-2019-437), 2019-06-21
Supplement: Supplementary file [file acp-2019-437-AC1-supplement.pdf]

We thank the reviewers for the helpful comments and providing us the opportunity to strengthen our research. We try to address all of them carefully. Below are point-to-point responses.

**Anonymous reviewer #2:**

The paper acp-2019-437 by Ni et al. deals with carbon isotope measurements ( $^{14}\text{C}$  and  $\delta^{13}\text{C}$ ) measurements on carbon fractions carried out in China. The analysed samples cover 33 days throughout one year, covering all seasons and low, medium, high concentrations. The paper is clear, generally well written and the presented data are of interest for the scientific community and for future development of efficient abatement strategies.  $^{14}\text{C}$  data on carbon fractions are still relatively rare due to particular treatment of the sample and the need of accelerator mass spectrometry for isotopic ratio quantification. Nevertheless, few major concerns should be solved before the paper can be published on ACP.

**Main comments:**

1) Pag.3 line 17: “1-year  $^{14}\text{C}$  measurements”. From this sentence, I would expect high percentage of day coverage throughout the year. Opposite, Figure S1 evidences that 33 days are covered (less than 10% day coverage). The reviewer is aware of the difficulties related to  $^{14}\text{C}$  measurements and appreciates the efforts to make the analyses representative of all seasons and aerosol loadings. Nevertheless, the sentence is somewhat misleading. Please rephrase.

**Response:** Thank you for this valuable feedback. Following the reviewer’s suggestion, we avoid using the expression “1-year  $^{14}\text{C}$  measurements” and “1-year source apportionment” in the revised manuscript. We thus have rephased the text (changes are underlined) to avoid misleading the reader:

“We present, to our best knowledge, the first  $^{14}\text{C}$  measurements covering all four seasons that distinguish fossil and non-fossil contributions to various carbon fractions, including EC, OC, WIOC and WSOC in Xi’an.” (page 3, line 17-19)

“This study presents the first source apportionment of various carbonaceous aerosol fractions, including EC, OC, WIOC and WSOC in Xi’an, China based on radiocarbon ( $^{14}\text{C}$ ) measurement in four seasons for the year 2015/2016.” (page 19, line 7-8)

2) Paragraph 2.2: information on field blanks is completely missing and should be added.

**Response:** Thank you for pointing this out. The average field blank of OC was  $0.9 \pm 0.2 \mu\text{g cm}^{-2}$  (N=6, equivalent to  $\sim 0.23 \pm 0.05 \mu\text{g m}^{-3}$ ), which was subtracted from the sample OC concentrations. EC on field blanks was in most cases below the detection level. We thus did not conduct the blank correction for EC concentrations. This underlined description is added in the Sect. 2.2 (page 4, line 17–19).

According, we add the sampling information of filed blanks in Method Sect. 2.1:

“Field blank filters were treated exactly like the sample filters, except that no air was drawn through the filter.” (page 3, line 30 – page 4, line 1)

3) Pag.4, line 21-22: “Extraction of EC was done by heating the carbon that remained on the filters at 850 °C for 5 h”. In air or oxygen? Could you provide information on EC recovery for this kind of analysis (e.g. compared to EC quantification by TOT?). Is it similar to the one for <sup>14</sup>C analysis?

**Response:** Extraction of EC was done by heating the carbon that remained on the filters at 850 °C for 5 h in another vacuum-sealed quartz tube. We have added this in the revised text (page 4, line 25).

In this study, we used a two-step method (OC step: 375 °C for 3 h; EC step: 850 °C for 5 h) to isolate OC and EC for  $\delta^{13}\text{C}$  analysis. Our earlier study in Xi’an found that EC recovery for  $\delta^{13}\text{C}$  analysis (relative to EC quantified by the thermal-optical reflectance protocol IMPROVE\_A; Chow et al., 2007) was on average  $123 \pm 8 \%$ , higher than 100% (Zhao et al., 2018). The reason is that pyrolyzed OC (formed through charring during the OC removal procedure) and possibly some remaining OC compounds (e.g., high molecular weight refractory carbon) can be released at the high temperature of EC step.

The fraction of pyrolyzed OC in EC varies from sample to sample (Huang et al., 2006), the less the better for  $\delta^{13}\text{C}$  analysis of EC. However, using the two-step method, we can not achieve pure EC (mainly due to the inclusion of pyrolyzed OC), and the resulted  $\delta^{13}\text{C}$  of EC could be biased by  $\delta^{13}\text{C}$  of pyrolyzed OC, if the contribution from pyrolyzed OC to the isolated EC is high and  $\delta^{13}\text{C}$  of pyrolyzed OC is very different from  $\delta^{13}\text{C}$  of pure EC.

To examine the effect of pyrolyzed OC on  $\delta^{13}\text{C}$  of EC, a sensitivity analysis is performed.  $\delta^{13}\text{C}$  of pyrolyzed OC is not known, but our recent studies suggest that  $\delta^{13}\text{C}$  of pyrolyzed OC is not very different from  $\delta^{13}\text{C}_{\text{OC}}$  (<1‰ in many cases). We thus use  $\delta^{13}\text{C}_{\text{OC}}$  (measured but not presented in this study) to represent  $\delta^{13}\text{C}$  of pyrolyzed OC.  $\delta^{13}\text{C}$  of pure EC is calculated based on isotope mass balance. This analysis shows that for high contribution from pyrolyzed OC to the isolated EC of 20%, the expected difference in  $\delta^{13}\text{C}$  between measured EC and true EC is still <1‰. This will not significantly change any conclusions made in this study.

We add the above discussion in the Supplement S1. In the main text, we add:

“Pyrolyzed OC can be formed through charring during the OC removal procedure and is released at the high temperature of EC step. To assess the potential effect of pyrolyzed OC on the measured  $\delta^{13}\text{C}_{\text{EC}}$ , we conducted a sensitivity analysis based on isotope mass balance (See details in the Supplemental S1). This analysis shows that even for high contribution from pyrolyzed OC to the isolated EC of 20%, the expected difference in  $\delta^{13}\text{C}$  between measured EC and true EC is still <1‰.” (page 5, line 4-7)

For <sup>14</sup>C analysis of EC, a full recovery of EC cannot be achieved, because we applied an intermediate step to remove more-refractory OC and also less refractory EC, to completely

remove OC (Dusek et al., 2014). This has been explained in Sect. 2.4.2. This EC isolation method for  $^{14}\text{C}$  analysis was evaluated and compared to methods from two other laboratories, finding that the results of  $^{14}\text{C}$  measurements in EC agree well within their uncertainty estimates (Zenker et al., 2017). In this study, EC recovery after the intermediate 450 °C step was approximately 70%, estimated by comparing to the EC quantified by EUSAAR 2 protocol. This underlined sentence has been added to Sect. 2.4.2 (page 6, line 1-2).

4) Pag.6, line 24: “Currently, the  $F^{14}\text{C}$  of the atmospheric  $\text{CO}_2$  is approximately 1.04 (Levin et al., 2008)”. Why do not using more updated values? (see e.g. <https://www.atmos-chem-phys.net/18/6187/2018/acp-18-6187-2018.pdf>)

**Response:** We now specify the year (2010) for the  $F^{14}\text{C}$  of 1.04. This value cited at this point in the manuscript is for illustrative purpose only to give readers an idea how fast the  $F^{14}\text{C}$  in the atmosphere decreased since the stop of the nuclear bomb tests. For our estimate of  $F^{14}\text{C}_{\text{nf}}$  for OC later on (Sect.2.5), we use the most recent value of 1.02, estimated by Vlachou et al. (2018) from  $^{14}\text{CO}_2$  measurements in Schauinsland (Levin et al., 2010).

The revised text shows:

“ $F^{14}\text{C}$  of carbon from fossil sources is 0, and carbon from non-fossil sources (or “contemporary” sources) should have  $F^{14}\text{C}$  of 1. But the extensive release of  $^{14}\text{C}$  from nuclear bomb tests in the late 1950s and early 1960s and  $^{14}\text{C}$ -free  $\text{CO}_2$  from fossil fuel combustion has perturbed the atmospheric  $F^{14}\text{C}$  values significantly. The former increased the  $F^{14}\text{C}$  in the atmosphere by up to a factor of 2 in the northern hemisphere in the 1960s. The nuclear tests have been banned in the atmosphere, outer space and under water since 1963. Since then, the atmospheric  $F^{14}\text{C}$  has been slowly decreasing, as  $^{14}\text{C}$  is mainly taken up by the oceans and terrestrial biosphere and diluted by  $^{14}\text{C}$ -free  $\text{CO}_2$  (Hua and Barbetti, 2004; Levin et al., 2010). In 2010, the  $F^{14}\text{C}$  of the atmospheric  $\text{CO}_2$  is approximately 1.04 (Levin et al., 2008, 2010), whereas in 2014 it decreased to 1.02 (Vlachou et al., 2018).” (page 7, line 6-8)

5) Pag.7, line 15: “ $F^{14}\text{C}_{\text{bb}} = 1.10 \pm 0.05$ ”. Please clarify assumptions on wood age and fell date.

**Response:** For biogenic aerosols, aerosols emitted from cooking as well as annual crop, the  $F^{14}\text{C}$  is close to the value of current atmospheric  $\text{CO}_2$ .  $F^{14}\text{C}$  of wood burning is higher than that, because a significant fraction of carbon in the wood burned today was fixed during times when atmospheric  $^{14}\text{CO}_2$  were substantially higher than today. As the reviewer points out,  $F^{14}\text{C}$  of wood burning depends on the age and origin of the wood. Estimates of  $F^{14}\text{C}$  for wood burning are based on tree-growth models (e.g., Lewis et al., 2004; Mohn et al., 2008) and found to range from 1.08 to 1.30 relating to wood age and fell date (Heal, 2014, and references therein).

We have added the following explanation to the revised text:

“ $F^{14}\text{C}_{\text{bb}}$  represents  $F^{14}\text{C}$  of biomass burning including wood burning and crop residue burning. This is because that biomass burning in Xi'an mainly includes household usage of wood and crop residues as well as open burning of crop residues.  $F^{14}\text{C}$  for burning of

annual crop has a similar value of current atmospheric CO<sub>2</sub>. F<sup>14</sup>C of wood burning is higher than that and varies with the age of tree. Estimates of F<sup>14</sup>C for wood burning are based on tree-growth models (e.g., Lewis et al., 2004; Mohn et al., 2008) and found to range from 1.08 to 1.30 relating to wood age and fell date (Heal, 2014, and references therein). F<sup>14</sup>C<sub>bb</sub> was estimated as 1.10 ± 0.05 for Xi'an in this study. The lower limit of F<sup>14</sup>C<sub>bb</sub> corresponds to burning of young wood (5–10 years old tree harvested between 2010 and 2015) and crop residues as main sources of EC, and the upper end of F<sup>14</sup>C<sub>bb</sub> corresponds to older wood (30–60 years old tree) combustion as the main source of EC.” (page 7, line 29 to page 8, line 7)

6) Pag.7, line 18: “F<sup>14</sup>C<sub>nf</sub> = 1.09 ± 0.05”: it seems to be fully dominated by wood burning. Please, clarify how it was obtained.

**Response:** F<sup>14</sup>C<sub>nf</sub> is F<sup>14</sup>C of non-fossil sources including both biomass burning and biogenic emissions, and is calculated as

$$F^{14}C_{nf} = F^{14}C_{bb} \times p_{bb} + F^{14}C_{bio} \times p_{bio} \quad (R1)$$

Where F<sup>14</sup>C<sub>bio</sub> (=1.02) is the fraction of modern carbon of biogenic sources and was estimated from long-term <sup>14</sup>CO<sub>2</sub> measurements at the Schauinsland background station (Levin and Hammer, 2013; Levin et al., 2010). *p*<sub>bb</sub> and *p*<sub>bio</sub> are the fraction of biomass burning and biogenic sources to the total non-fossil sources, respectively. In Xi'an, China, we assume that biogenic OC is not very important, due to strong anthropogenic sources as evidenced by concentrations of carbonaceous aerosols (e.g., annual average TC concentrations of 27 μg/m<sup>3</sup> in 2012/2013 [Han et al., 2016] and on average of 17 μg m<sup>-3</sup> for selected samples for <sup>14</sup>C analysis in this study), that are much higher than typical concentrations of secondary biogenic aerosols. We thus set *p*<sub>bio</sub> to 0.15 ± 0.15, and find out *p*<sub>bio</sub> has only a very little impact on F<sup>14</sup>C<sub>nf</sub> compared to other uncertainties, e.g., an increase of *p*<sub>bio</sub> from 0.15 to 0.3 would lead to small change in the central value of F<sup>14</sup>C<sub>nf</sub> from 1.09 to 1.08.

To clarify, the revised text shows:

“Analogously, the relative contribution of non-fossil sources to OC, WIOC and WSOC (i.e., *f*<sub>nf</sub>(OC), *f*<sub>nf</sub>(WIOC) and *f*<sub>nf</sub>(WSOC), respectively) can be estimated from their corresponding F<sup>14</sup>C values and F<sup>14</sup>C<sub>nf</sub>. F<sup>14</sup>C<sub>nf</sub> is F<sup>14</sup>C of non-fossil sources including both biomass burning and biogenic sources. F<sup>14</sup>C of biogenic sources can be estimated from long-term <sup>14</sup>CO<sub>2</sub> measurements at the Schauinsland background station (Levin and Hammer, 2013; Levin et al., 2010). In Xi'an, biogenic OC is probably not very important, as could be expected from high concentrations of carbonaceous aerosols and strong anthropogenic sources. F<sup>14</sup>C<sub>nf</sub> is thus estimated as 1.09 ± 0.05 (Lewis et al., 2004; Levin et al., 2010; Y. L. Zhang et al., 2014). The central value of 1.09 corresponds to 15% contribution of biogenic OC to OC.” (page 8, line 8-14).

7) Pag.9, line 10-17: overlapping interval for expected  $\delta^{13}\text{C}$  for nearly all sources is present. This makes the analysis very weak, also considering that results are in contrast with  $^{14}\text{C}$  results (see pag.15, last paragraph). The reason to maintain this section and the related analyses should be better clarified. Figure S4 should be added to the text as it evidences the difficulties in apportioning coal and liquid fossil fuel contributions separately.

**Response:** Following the reviewer's suggestion, we have moved the Figure S4 from the supplemental material to the main body of the manuscript, namely Figure 6. The order of figures in the main text and supplemental material is adapted accordingly.

The source endmembers for  $\delta^{13}\text{C}$  are less well-constrained than for  $F^{14}\text{C}$ , as  $\delta^{13}\text{C}$  varies with fuel types and combustion conditions. The  $^{14}\text{C}$  results can constrain fossil and biomass burning contribution to EC very well. But in this study, we can only separate fossil EC into EC from coal combustion and EC from vehicular emission by complementing  $^{14}\text{C}$  with  $^{13}\text{C}$ . The following sentences are added in the Sect. 2.6 to clarify this:

“EC from fossil sources can be first separated from biomass burning by  $F^{14}\text{C}_{(\text{EC})}$ . Further,  $\delta^{13}\text{C}_{\text{EC}}$  allows separation of fossil sources into coal and liquid fossil fuel burning” (page 10, line 2-3)

In the Sect. 2.6, we further elaborate on the consequence of the overlapping  $\delta^{13}\text{C}$  source signatures:

“The source endmembers for  $\delta^{13}\text{C}$  are less well-constrained than for  $F^{14}\text{C}$ , as  $\delta^{13}\text{C}$  varies with fuel types and burning conditions. For example, the range of possible  $\delta^{13}\text{C}_{\text{liq.fossil}}$  overlaps to a small extent with the range of  $\delta^{13}\text{C}_{\text{coal}}$ , although liquid fossil fuels are usually more depleted than coal. The MCMC technique takes into account the variability in the source signatures of  $F^{14}\text{C}$  and  $\delta^{13}\text{C}$  (Parnell et al., 2010, 2013), where  $\delta^{13}\text{C}$  introduces a larger uncertainty than  $F^{14}\text{C}$ . Uncertainties of  $\delta^{13}\text{C}_{\text{bb}}$ ,  $\delta^{13}\text{C}_{\text{liq.fossil}}$ ,  $\delta^{13}\text{C}_{\text{coal}}$  and  $F^{14}\text{C}_{\text{bb}}$  as well as the measured ambient  $\delta^{13}\text{C}_{\text{EC}}$  and  $F^{14}\text{C}_{(\text{EC})}$  are propagated. The results of the MCMC calculations are the posterior PDFs for  $f_{\text{bb}}$ ,  $f_{\text{liq.fossil}}$  and  $f_{\text{coal}}$ . The PDFs of  $f_{\text{liq.fossil}}$  and  $f_{\text{coal}}$  are skewed. By contrast, the PDFs of  $f_{\text{bb}}$  is symmetric as it is well-constrained by  $F^{14}\text{C}$  (Fig. 6). In this study, the median is used to represent the best estimate of the  $f_{\text{bb}}$ ,  $f_{\text{liq.fossil}}$  and  $f_{\text{coal}}$ . Uncertainties of this best estimate are expressed as an interquartile range (25th-75th percentile) of the corresponding PDFs.” (page 10, line 11-20)

The reasons to maintain this Sect. 2.6 are mentioned several times in this manuscript, for example:

(a) in the introduction section

“We present, to our best knowledge, the first  $^{14}\text{C}$  measurements covering all four seasons that distinguish fossil and non-fossil contributions to various carbon fractions, including EC, OC, WIOC and WSOC in Xi'an. Fossil sources of EC are further divided into coal and liquid fossil fuel combustion by complementing radiocarbon with the stable carbon isotopic signature.” (page 3, line 17-20)

(b) in the result Sect. 3.3. Combustion sources apportioned by stable carbon isotopes

“Along with radiocarbon data, the stable carbon isotopic ratio of EC (denoted by  $\delta^{13}\text{C}_{\text{EC}}$ ) provides additional insight into source apportionment of EC, especially between different type of fossil sources (i.e., coal versus liquid fossil fuel combustion).” (page 14, line 1-3)

(c) in the method Sect. 2.5, the results of MCMC calculations (i.e., Bayesian statistics combining  $\text{F}^{14}\text{C}_{(\text{EC})}$  and  $\delta^{13}\text{C}_{\text{EC}}$ ) are used to estimate  $p$  values, and subsequently  $\text{POC}_{\text{fossil}}$  and  $\text{SOC}_{\text{fossil}}$ :

“ $\text{POC}_{\text{fossil}}$  can be estimated from  $\text{EC}_{\text{fossil}}$  and primary OC/EC ratio of fossil fuel combustion ( $r_{\text{fossil}}$ ):

$$\text{POC}_{\text{fossil}} = \text{EC}_{\text{fossil}} \times r_{\text{fossil}}. \quad (10)$$

Fossil sources in China are almost exclusively from coal combustion and vehicle emissions, thus  $r_{\text{fossil}}$  can be estimated as

$$r_{\text{fossil}} = r_{\text{coal}} \times p + r_{\text{vehicle}} \times (1 - p), \quad (11)$$

where  $p$  is the relative contribution of coal combustion to fossil EC. That is,  $p = \text{EC}_{\text{coal}}/\text{EC}_{\text{fossil}}$ , where estimation of  $\text{EC}_{\text{coal}}$  is achieved by combining  $\text{F}^{14}\text{C}_{(\text{EC})}$  and  $\delta^{13}\text{C}_{\text{EC}}$  with the Bayesian calculations as described in details in the Sect. 2.6 and Supplement S2.” (page 9, line 9-15)

**8)** Pag.10, line 16: “slight but consistent tendency”: what is “slight”? And in what sense “consistent”? The authors should specify the statistical approach used to verify “consistency”.

**Response:** “Consistent” is used to compare the seasonal patterns of  $f_{\text{fossil}}(\text{EC})$  and  $f_{\text{fossil}}(\text{OC})$ .  $f_{\text{fossil}}(\text{EC})$  is higher in spring than in summer and autumn, and this is also true for  $f_{\text{fossil}}(\text{OC})$ .

We thank the reviewer to point it out that “slight” may not be enough to quantify the seasonal changes, and in the revised text we add the  $f_{\text{fossil}}(\text{EC})$  and  $f_{\text{fossil}}(\text{OC})$  values in spring and in summer and autumn:

“The  $f_{\text{fossil}}(\text{EC})$  and  $f_{\text{fossil}}(\text{OC})$  follow the same seasonal trends: the values are lower in winter and higher in the rest of the seasons (i.e., warm period). Within the warm period, both are slightly higher in spring ( $f_{\text{fossil}}(\text{EC}) = 86 \pm 3\%$ ,  $f_{\text{fossil}}(\text{OC}) = 50 \pm 1\%$ ) than in summer and autumn ( $f_{\text{fossil}}(\text{EC}) = 84 \pm 2\%$ ,  $f_{\text{fossil}}(\text{OC}) = 47 \pm 3\%$ ) in general and also to be slightly lower under the cleanest periods (i.e., in spring, summer and autumn,  $f_{\text{fossil}}(\text{EC})$  and  $f_{\text{fossil}}(\text{OC})$  in polluted days (“H” and “M” samples) were higher than in clean days (“L” samples); Fig. 1, Tables 1, S5).” (page 11, line 15-19)

We did not perform any statistical approach to verify “slight” and “consistency”. Because our sample sizes are too small to determine if a parametric test (that assume a normal distribution) is applicable. However, either for a parametric or non-parametric test the statistical power is low for small sample sizes, e.g., to compare polluted and non-polluted days we would compare samples with 6 vs 3 data points, which makes any statistical test unreliable. Therefore, we only qualitatively describe apparent trends, illustrated in Figure R1. As shown in Fig. R1(a),  $f_{\text{fossil}}(\text{OC})$  in both polluted days (“H” and “M” samples) and clean days (“L” samples) is higher in spring

than that in summer and autumn. Moreover, in spring, summer and autumn, the  $f_{\text{fossil}}(\text{OC})$  is lower in clean days than in polluted days. Those are mostly true for  $f_{\text{fossil}}(\text{EC})$  as shown in Fig. R1(b), except that  $f_{\text{fossil}}(\text{EC})$  for sample Summer-M ( $0.827 \pm 0.005$ ) and Summer-L ( $0.835 \pm 0.006$ ).

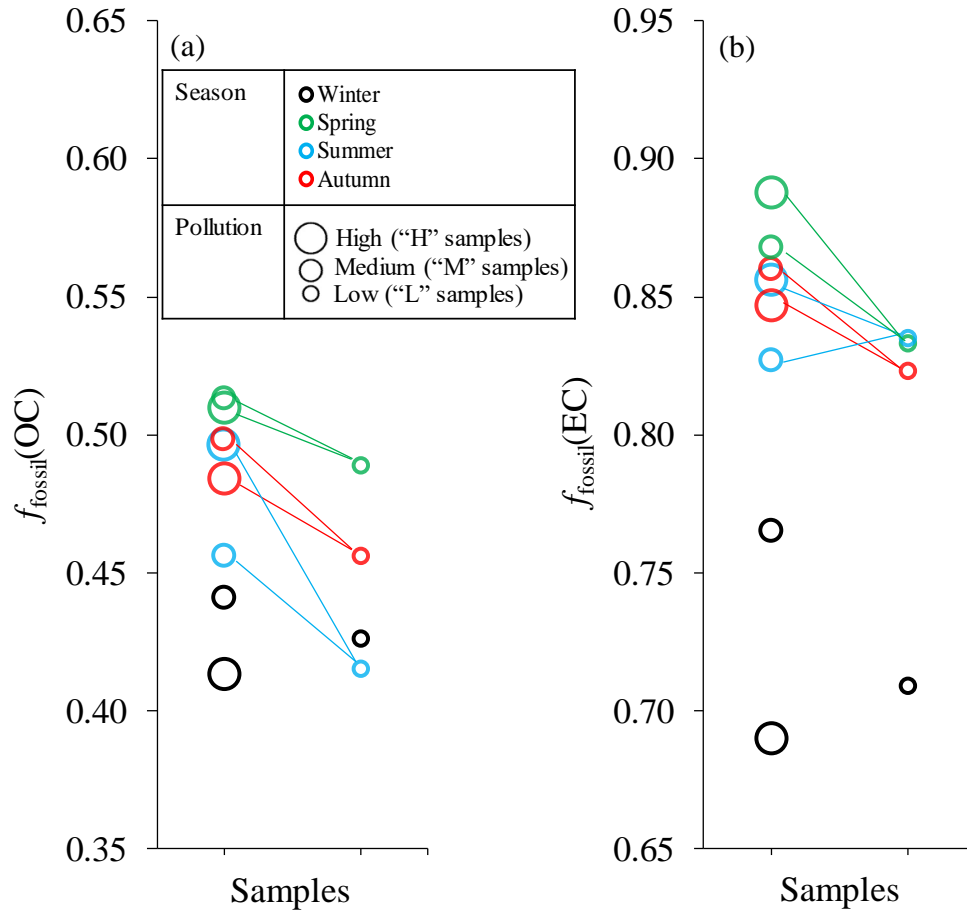

**Figure R1.** (a)  $f_{\text{fossil}}(\text{OC})$  in both polluted days (“H” and “M” samples) and clean days (“L” samples) in different seasons. (b)  $f_{\text{fossil}}(\text{EC})$  in both polluted days (“H” and “M” samples) and clean days (“L” samples) in different seasons

9) Page 10, line 22: “lower in other seasons (around 15%) with a slightly lower values in spring ( $14 \pm 3\%$ )”. Is spring really different compared to autumn and summer? As it is mentioned, it should be proved by statistical tests)

**Response:** The  $f_{\text{bb}}(\text{EC})$  averages  $14 \pm 3\%$  ( $\pm$  SD; N=3) in spring, and  $16 \pm 2\%$  ( $\pm$  SD; N=6) in autumn and summer. Because our sample sizes are small, it is difficult to determine if a parametric test (that assume a normal distribution) is applicable. In addition, the statistical power is low for small sample sizes. We thus decide not to perform any statistical tests to compare  $f_{\text{bb}}(\text{EC})$  in spring and in autumn and summer. In contrast, Figure R2 allow us to examine the data distribution, and we can see that in both polluted days (“H” and “M” samples) and clean days (“L” samples),  $f_{\text{bb}}(\text{EC})$  is a bit lower in spring ( $14 \pm 3\%$ ) than in summer and autumn ( $16 \pm 3\%$ ), but the trend is not clear.

To be specify, we revised the text and delete the sentence “with a slightly lower values in spring (14 ± 3%)”:

“ $f_{bb}(EC)$  is higher in winter ( $28 \pm 4\%$ ) than that in other seasons (i.e., warm period, on average  $15 \pm 2\%$ ).” (page 11, line 24-25)

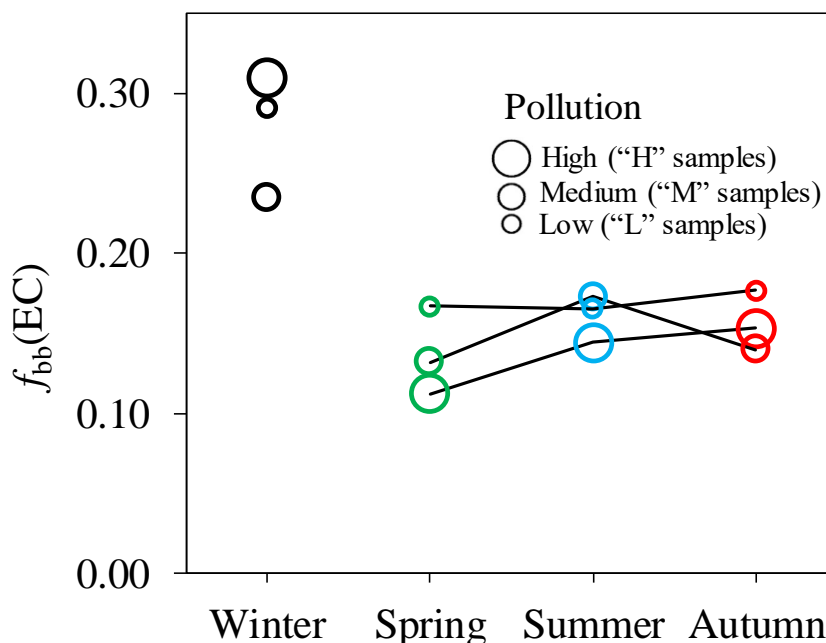

**Figure R2.**  $f_{bb}(EC)$  in both polluted days (“H” and “M” samples) and clean days (“L” samples) in different seasons

**10)** Page 10, Lines 21-29: table S1 merits to be added to the manuscript, as not all the numbers are reported in the text.

**Response:** Page 10, Lines 21-29 in the original manuscript (page 11, line 23-31 in the revised manuscript) discuss the seasonal changes of the relative contribution of fossil/non-fossil sources to EC and OC (e.g.,  $f_{fossil}(EC)$ ,  $f_{bb}(EC)$ ,  $f_{fossil}(OC)$ ) (So we suppose the reviewer refers to Table S3). We show those data in Table S3 in the original manuscript, which has been moved to the main text as Table 1. The order of Tables in the supplemental material is adapted accordingly.

**11)** Page 11, Line 5: “ $6.8 \pm 6.0 \mu\text{g m}^{-3}$ ”. Maybe interquartile range is more significant than standard deviation, as the data distribution is not expected to follow a gaussian curve. Same comment for analogous representation of absolute concentrations in the rest of the text (e.g. pag.11, lines 6, 22)

**Response:** In  $^{14}\text{C}$ -based source apportionment of aerosol, it is common to have a small sample size (e.g.,  $N < 30$ ), as  $^{14}\text{C}$  measurement is costly and time-consuming. In this study, to get the representative samples for  $^{14}\text{C}$  analysis, a subset of 33 daily samples was pooled into 9 composite samples (See Sect. 2.4.1 for sampling selection for  $^{14}\text{C}$  analysis). The interquartile range (25th–



75th percentile; or Q1–Q3) is not appropriate to measure the spread for those grouped data that are very sparse in the upper range e.g., near Q3, making the estimate vary uncertain (Fig. R3).

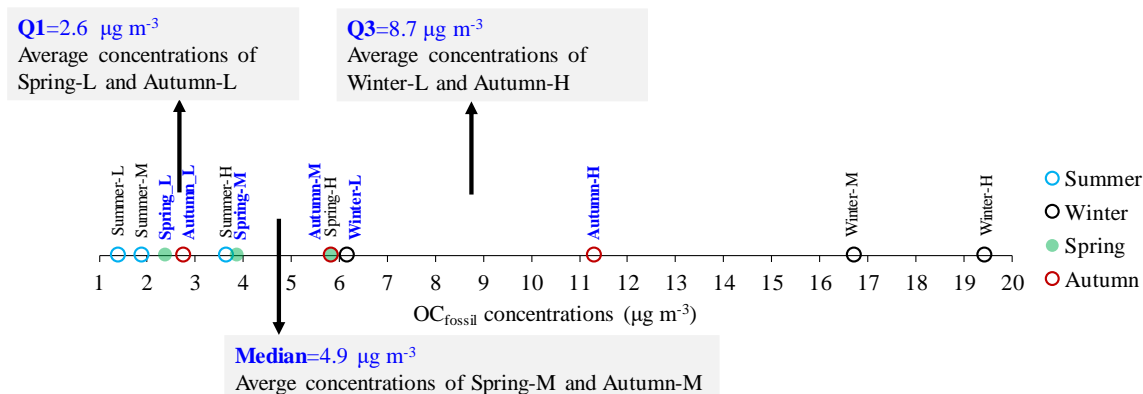

Figure R3. An illustration of how to calculate median and interquartile range (Q1–Q3) for OC<sub>fossil</sub>.

We would like to report mean and range of min–max to measure the spread of data. In the revised manuscript, we report OC<sub>fossil</sub> concentrations:

“OC concentrations from fossil fuel combustion (OC<sub>fossil</sub>) range from about 1 to 20 µg m<sup>-3</sup>, with an average of 6.8 µg m<sup>-3</sup>, which is comparable to non-fossil OC concentrations (range: 2–28 µg m<sup>-3</sup>; mean: 8.2 µg m<sup>-3</sup>).” (page 12, line 7-9)

Analogously, for concentrations in the rest of the text, we now report mean (range of min–max):

“WSOC concentrations from non-fossil sources (WSOC<sub>nf</sub>) are larger than WSOC from fossil sources (WSOC<sub>fossil</sub>) at 95% confidence level (paired *t*-test, *P*-value=0.016), with an average of 5.1 µg m<sup>-3</sup> (range of 1.5–16.7 µg m<sup>-3</sup>) for WSOC<sub>nf</sub> versus an average of 3.6 µg m<sup>-3</sup> (range of 0.6–9.4 µg m<sup>-3</sup>) for WSOC<sub>fossil</sub> (Fig. 2).” (page 12, line 24-26)

“In winter, the averaged WIOC<sub>fossil</sub> concentrations of 7.1 µg m<sup>-3</sup> (range of 3.3–10.1 µg m<sup>-3</sup>) matched the averaged POC<sub>fossil</sub> concentrations of 6.0 µg m<sup>-3</sup> (range of 2.7–9.2 µg m<sup>-3</sup>). However, in the warm period, the WIOC<sub>fossil</sub> concentrations (1.8 µg m<sup>-3</sup>, with a range of 0.8–5.4 µg m<sup>-3</sup>) do not match the estimated POC<sub>fossil</sub> (2.7 µg m<sup>-3</sup>, with a range of 0.8–7.1 µg m<sup>-3</sup>) equally well.” (page 17, line 18-21)

**12)** Pag.11, line 21-23: “larger than”, “comparable with”: which are the statistical criteria used to evaluate comparability?

**Response:** We perform paired *t*-tests (N=12) to evaluate comparability for WSOC<sub>nf</sub> vs. WSOC<sub>fossil</sub>, WIOC<sub>nf</sub> vs. WIOC<sub>fossil</sub>. WSOC<sub>nf</sub> concentrations are larger than WSOC<sub>f</sub> at 95% confidence level (paired *t*-test, *P*-value = 0.016) and the difference between WIOC<sub>nf</sub> and WIOC<sub>fossil</sub> is not significant (*P*-value =0.113).

Note that the paired *t*-test might not be strictly valid for WSOC, because there are two data points have a very large difference compare to the rest in the scatter plot of WSOC<sub>fossil</sub> vs. WSOC<sub>nf</sub> (Fig.

R4a). But the  $P$ -value ( $=0.016$ ) is clearly smaller than 0.05, that we do not expect this to make a big difference in our conclusion.

The revised text shows:

“WSOC concentrations from non-fossil sources ( $WSOC_{nf}$ ) are larger than WSOC from fossil sources ( $WSOC_{fossil}$ ) at 95% confidence level (paired  $t$ -test,  $P$ -value=0.016), with an average of  $5.1 \mu\text{g m}^{-3}$  (range of  $1.5\text{--}16.7 \mu\text{g m}^{-3}$ ) for  $WSOC_{nf}$  versus an average of  $3.6 \mu\text{g m}^{-3}$  (range of  $0.6\text{--}9.4 \mu\text{g m}^{-3}$ ) for  $WSOC_{fossil}$  (Fig. 2). WIOC concentrations from non-fossil sources ( $WIOC_{nf}$ ) do not differ significantly from fossil sources ( $WIOC_{fossil}$ ) (paired  $t$ -test,  $P$ -value=0.113).” (page 12, line 24-28)

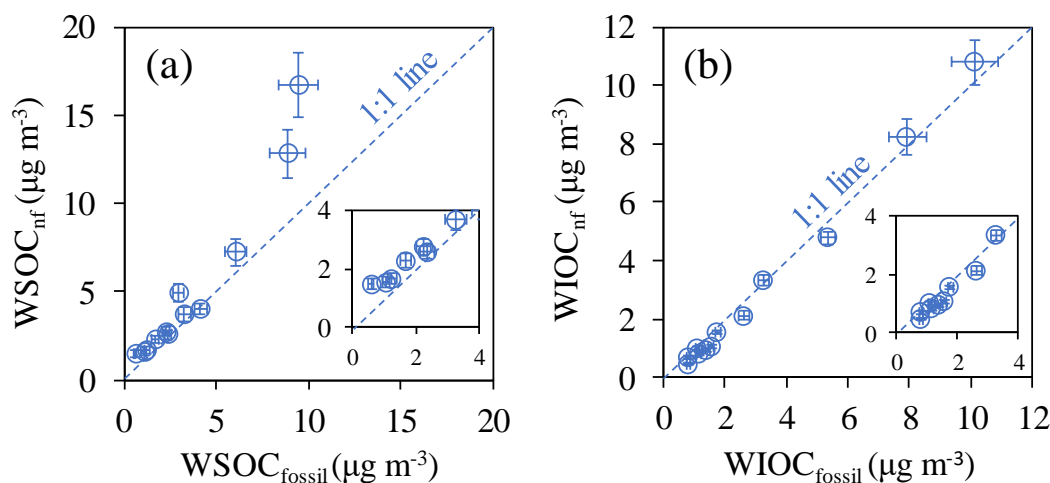

**Figure R4.** (a) A scatter plot of  $WSOC_{fossil}$  concentrations versus  $WSOC_{nf}$  concentrations. (b) A scatter plot of  $WIOC_{fossil}$  concentrations versus  $WIOC_{nf}$  concentrations. Uncertainties of  $WSOC_{fossil}$ ,  $WSOC_{nf}$ ,  $WIOC_{fossil}$  and  $WIOC_{nf}$  are shown by blue bars.

**13)** Pag.12, line 13: “The fossil OC is less water soluble in winter with lower  $(WSOC/OC)_{fossil}$  ratios of around 0.5 than in the warm period”. What is “warm period”? Why indicating the value during winter and not during the warm period? Are the differences statistically significant, also considering the limited number of data available?

**Response:** In this study, we use “warm period” to represent spring, summer and autumn, opposite to the cold winter. This is clarified when “warm period” is used for the first time in this manuscript (page 11, line 16). We explain “warm period” again to remind readers in the revised text:

“The fossil OC is less water soluble in winter with somewhat lower  $(WSOC/OC)_{fossil}$  ratios than in the rest of seasons (i.e., warm period). ” (page 13, line 18-19)

The values for  $(WSOC/OC)_{fossil}$  ratios (e.g., mean, standard deviation, range) in both winter ( $0.50 \pm 0.03$ , with a range of  $0.48\text{--}0.53$ ) and warm period ( $0.57 \pm 0.08$ , with a range of  $0.42\text{--}0.70$ ) have been added to the text. Considering the limited number of data available ( $N=3$  in winter,

N=9 in warm period) (as the reviewer reminds), a parameter test to compare  $(\text{WSOC}/\text{OC})_{\text{fossil}}$  ratios in winter and warm period is not applicable. However, ranges and standard deviations allow us to examine the variability of data, and we found that  $(\text{WSOC}/\text{OC})_{\text{fossil}}$  ratios in winter ( $0.50 \pm 0.03$ , with a range of 0.48–0.53) fall into the lower end of the range of  $(\text{WSOC}/\text{OC})_{\text{fossil}}$  ratios in warm period ( $0.57 \pm 0.08$ , with a range of 0.42–0.70). In warm period, the lowest  $(\text{WSOC}/\text{OC})_{\text{fossil}}$  ratio was found for Summer-L (0.42), much lower than that for Summer-H (0.62), which is very likely related to the formation of high pollutant concentrations for Summer-H. This has been explained in the same paragraph of Sect. 3.2 that more stagnant conditions in polluted periods allow for accumulation of pollutants and also more time for photochemical processing of WIOC and WSOC formation.

The underlined sentences have been added in the revised text (page 13, line 19-20).

**14) Paragraph 3.3:** similarities in  $\delta^{13}\text{C}$  reference values for different sources affect the results presented here. The results show very high variability and this should be better commented in the text, also in the light of figure S4.

**Response:** In response to question 7, we have moved the Figure S4 to the main text as Figure 6.

We agree with the reviewer that  $\delta^{13}\text{C}$  reference values for different sources are less well-constrained in contrast to  $\text{F}^{14}\text{C}$  reference values, leading to high variability in EC source apportionment results using Bayesian Markov chain Monte Carlo (MCMC) calculations (for details, see Sect. 2.6).

The results of the MCMC calculations are the posterior probability density functions (PDFs) for the relative contribution from biomass burning ( $f_{\text{bb}}$ ), liquid fossil fuel combustion ( $f_{\text{liq.fossil}}$ ) and coal combustion to EC ( $f_{\text{coal}}$ ) (Fig. 6). The PDFs of  $f_{\text{liq.fossil}}$  and  $f_{\text{coal}}$  are much more spread out than that of  $f_{\text{bb}}$ , as  $f_{\text{bb}}$  is well-constrained by  $\text{F}^{14}\text{C}$ . The interquartile ranges for  $f_{\text{liq.fossil}}$  overlap with those for  $f_{\text{coal}}$  in winter and spring (Table S7). However, comparing the PDFs distribution for both cases give a more complete picture. As shown in Fig. 6, there is fair amount of overlap between the PDFs distributions of  $f_{\text{liq.fossil}}$  and  $f_{\text{coal}}$ . Though with some overlaps, in all seasons, the distribution of  $f_{\text{liq.fossil}}$  are skewed to the left, while  $f_{\text{coal}}$  is skewed to the right, with considerably higher median  $f_{\text{liq.fossil}}$  than median  $f_{\text{coal}}$ . With the current inherent uncertainties in this state-of-the-art source apportionment methods it will not be possible to draw more firm conclusions than that these probability distributions show a certain trend, despite some possible overlap.

To better separate  $f_{\text{liq.fossil}}$  from  $f_{\text{coal}}$ , more measurements of  $\delta^{13}\text{C}$  of EC from localized emission sources are in urgent need for further studies. In this study,  $\delta^{13}\text{C}$  source signatures for EC are fully compiled and established by a thorough literature search, but unfortunately there are not many studies on  $\delta^{13}\text{C}$  of EC from different combustion sources and how it changes with combustion conditions.

We have added the above underlined sentences to the Sect. 3.3 (page 14, line 32 to page 15, line 4).

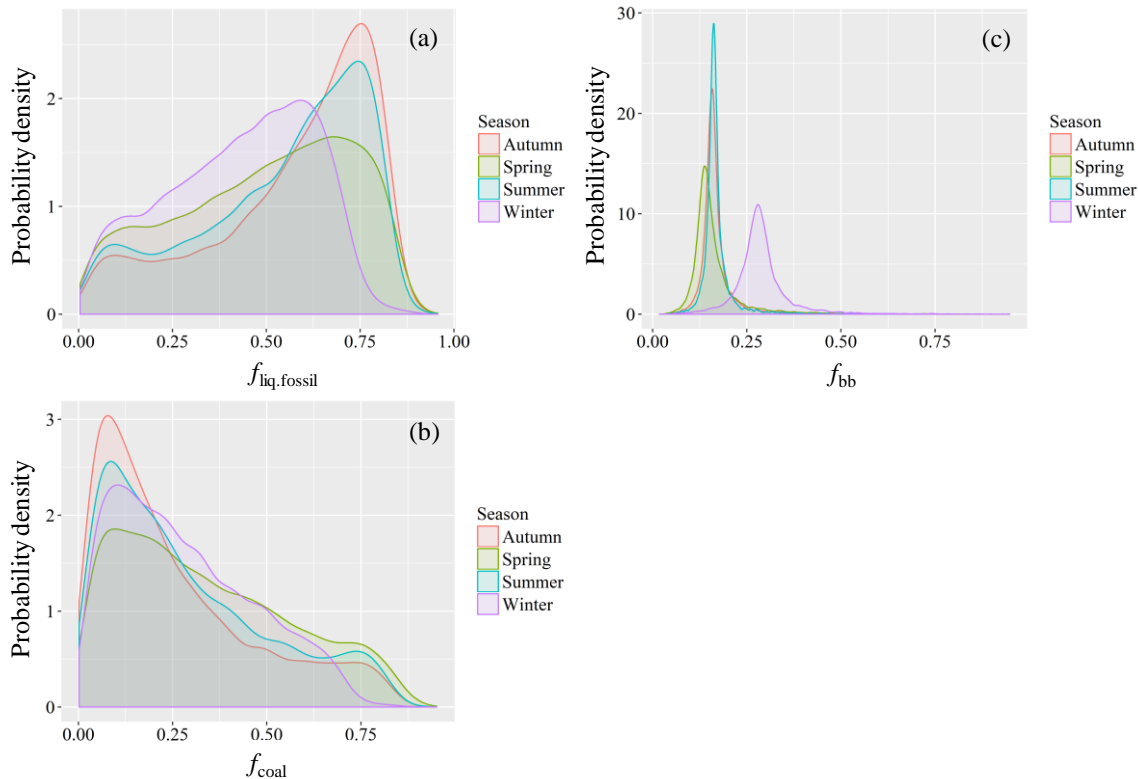

**Figure 6.** Probability density functions (PDFs) of the relative source contributions of (a) liquid fossil fuel combustion ( $f_{\text{liq.fossil}}$ ), (b) coal combustion ( $f_{\text{coal}}$ ) and (c) biomass burning ( $f_{\text{bb}}$ ) to EC constrained by combining radiocarbon and  $\delta^{13}\text{C}$  measurements, calculated using the Bayesian Markov chain Monte Carlo approach. For details, see Sect. 2.6.

15) Pag.13 line 31: “moderately”. Quantify and evaluate statistical significance

**Response:** We have quantified the increase in both  $\text{EC}_{\text{liq.fossil}}$  and  $\text{EC}_{\text{coal}}$  from summer to winter and avoid to use “moderately” to evaluate the statistical significance based on the small sample sizes, the revised text shows:

“EC from coal combustion ( $\text{EC}_{\text{coal}}$ ) has a 5-fold increase from about  $0.3 \mu\text{g m}^{-3}$  in summer and autumn to  $1.6 \mu\text{g m}^{-3}$  in winter. EC from liquid fossil fuel ( $\text{EC}_{\text{liq.fossil}}$ ) varies less strongly than  $\text{EC}_{\text{bb}}$  and  $\text{EC}_{\text{coal}}$ , by 4-times from  $0.7 \mu\text{g m}^{-3}$  in summer and  $2.9 \mu\text{g m}^{-3}$  in winter...Compared to the 4-times increase in  $\text{EC}_{\text{liq.fossil}}$  from summer to winter,  $\text{EC}_{\text{coal}}$  only increases by five times in winter” (page 15 line 11-12)

16) Pag.14, line 1: “more constant”. Compared to what?

**Response:** We intent to say that winter-time increase in  $\text{EC}_{\text{coal}}$  is only slightly higher than the increase in  $\text{EC}_{\text{liq.fossil}}$ . This has been explained in the previous sentence “Compared to the 4-times increase in  $\text{EC}_{\text{liq.fossil}}$  from summer to winter,  $\text{EC}_{\text{coal}}$  only increases by five times in winter”. To avoid confusion, we thus delete the sentence:

~~“This suggests that coal combustion is a relatively constant source over the year 2015/2016.”~~ (page 15, line 12-13)

17) Pag.14, line 24: “rapid”. Please quantify (hours? Days?) and justify the sentence.

**Response:** We agree with the reviewer that “rapid” is not enough to quantify how fast is SOC formation. Further, after careful consideration of this statement, we think that it is not justify to conclude “rapid” formation of SOC from “the importance of fossil derived SOC formation to fossil OC during wintertime was also found in other Chinese cities”. We thus delete the “suggesting the *rapid* formation of SOC even in winter (R. J. Huang et al., 2014).”

The revised text shows:

“Much higher contribution of SOC<sub>fossil</sub> to OC<sub>fossil</sub> (an annual average of around 70%) was found in southern China (Y. L. Zhang et al., 2014). The importance of fossil derived SOC formation to fossil OC during wintertime was also found in other Chinese cities, including Beijing, Shanghai and Guangzhou (Zhang et al., 2015a).” (page 16, line 1-4)

18) Pag.15, line 31: “Those contradictions will be discussed in the following section”. Coal is hardly mentioned in the following paragraph, thus it is unclear what the authors are referring to.

**Response:** We intend to say “Possible causes of those contradictions will be explained in the following section.”, and we have therefore altered the text to specify (page 17, line 11).

In the followed Sect. 3.6, we state that:

(a) “In the warm period, semi-volatile OC from fossil emission sources partitions more readily to the gas-phase leading to lower primary OC/EC ratios compared to winter. This is supported by laboratory studies and ambient observations, which find that the primary OC/EC ratio for vehicle emissions is lower in warm period than in winter (Xie et al., 2017; X. H. H. Huang et al., 2014).” (highlight in yellow on page 18, line 12-15)

That is, primary OC/EC ratios from coal combustion ( $r_{\text{coal}}$ ) and vehicle emissions ( $r_{\text{vehicle}}$ ) in warm period are lower than that in winter. This can (partially) explain the first contradiction that (WIOC/EC)<sub>fossil</sub> ratios in warm period indicating vehicle emissions is the overwhelming fossil source, which is inconsistent with the fact both coal combustion and vehicle emissions contribute to fossil EC.

(b) We observed “decreased (WIOC/EC)<sub>fossil</sub> when pollution gets worse in summer and spring, indicating the loss of fossil WIOC during polluted period. This is probably due to more stagnant conditions in polluted periods, which allows for accumulation of pollutants and also more time for photochemical processing of WIOC and SOC formation” (highlight in yellow on page 17, line 21 to page 18, line 1-3)

This may explain why the differences in (WIOC/EC)<sub>fossil</sub> between winter and warm period are bigger than  $\delta^{13}\text{C}_{\text{EC}}$  indicated (another contradiction). Because WIOC<sub>fossil</sub> can be affected by atmospheric processing, while  $\delta^{13}\text{C}_{\text{EC}}$  not.

19) Pag.16, line 11 and Pag.17, line 6: “slope of 1.31, and intercept of 0.32 and an  $R^2$  of 0.92”. “a slope of 0.62, and intercept of 0.01 and an  $R^2$  of 0.92”. As important uncertainties affect quantities both on  $x$  and  $y$  axis, 2-sided (Deming) regression should be attempted for better representation of these regression lines

**Response:** The reviewer is right to point out that the regression line is affected by uncertainties both on  $x$  and  $y$  axis. Ordinary least squares (OLS) regression (which was used in the original manuscript) is an acceptable approximation for Deming regression if relative uncertainties in  $x$ -axis are small compared to relative uncertainties in  $y$ -axis and/or  $R^2$  is high (Wu et al., 2018). Both are the case for our regressions. On the one hand,  $x$ -axis ( $WIOC_{\text{fossil}}$  or  $WSOC_{\text{fossil}}$ ; Table S3) has small error relative to  $y$ -axis ( $POC_{\text{fossil}}$  or  $SOC_{\text{fossil}}$ ; Table S4) as shown in Figs. 9a, 9b. On the other hand, high  $R^2$  ( $>0.9$ ; Figs. 9c, 9d) limits the deviations between Deming regression and OLS regression. As a consequence, Deming regression results are very close to OLS results.

(a) regression of  $POC_{\text{fossil}}$  ( $y$ ) on  $WIOC_{\text{fossil}}$  ( $x$ )

Deming regression results ( $y = 1.32x + 0.31$ ,  $R^2 = 0.92$ ) are very close to OLS results ( $y = 1.31x + 0.31$ ,  $R^2 = 0.92$ ), with very similar slope, intercept and correlation of determination ( $R^2$ ).

(b) regression of  $SOC_{\text{fossil}}$  ( $y$ ) on  $WSOC_{\text{fossil}}$  ( $x$ )

Deming regression results ( $y = 0.62x + 0$ ,  $R^2 = 0.92$ ) are very close to OLS results ( $y = 0.62x + 0.01$ ,  $R^2 = 0.92$ )

In this study, the regression results are not used for further calculation and discussion. If possible, we think it probably acceptable to keep the OLS results as they were in the original manuscript.

20) Pag.17, line 10. “that a small fraction of primary fossil OC is water-soluble (Dai et al., 2015; Yan et al., 2017).” This sentence should be moved more above, as it is also a justification of higher fossil POA compared to fossil  $WIOC$ .

**Response:** We appreciate this point. We have moved this sentence and the following explanation from the 4<sup>th</sup> paragraph to the 2<sup>nd</sup> paragraph of Sect. 3.6.

“On the other hand, measurements of fresh emissions from fossil sources show that only a small fraction (~10%) of primary fossil OC is water-soluble (Dai et al., 2015; Yan et al., 2017). The differences between  $POC_{\text{fossil}}$  and  $WIOC_{\text{fossil}}$  (25–55%) are much larger than that and therefore the small fraction of primary fossil  $WSOC$  can not explain the differences between  $POC_{\text{fossil}}$  and  $WIOC_{\text{fossil}}$ ” (page 17, line 27-30)

21) Pag.19, line 2: “We suggest that  $WIOC_{\text{fossil}}$  and  $WSOC_{\text{fossil}}$  are probably a better approximation for primary and secondary fossil OC, respectively, than  $POC_{\text{fossil}}$  and  $SOC_{\text{fossil}}$  estimated using the EC tracer method”. This is in contrast with the sentence at the previous point.

**Response:** We thank the reviewer for this helpful comment. Several statements that we made were more ambiguous than intended, and we have clarified the text:

“WIOC<sub>fossil</sub> and WSOC<sub>fossil</sub> have been used widely as proxies of the primary and secondary fossil OC, respectively, since primary fossil sources tend to produce mainly WIOC. In winter, mass concentrations of WIOC<sub>fossil</sub> were comparable to POC<sub>fossil</sub> and WSOC<sub>fossil</sub> to SOC<sub>fossil</sub>, where POC<sub>fossil</sub> and SOC<sub>fossil</sub> are estimated using EC tracer method. However, the agreement was worse in the warm period, even though the respective concentrations were highly correlated. In other words, variations in WIOC<sub>fossil</sub> and WSOC<sub>fossil</sub> follow similar trends as POC<sub>fossil</sub> and SOC<sub>fossil</sub>, respectively. However, the absolute concentrations of WIOC<sub>fossil</sub> and WSOC<sub>fossil</sub> are not equal to those of estimated POC<sub>fossil</sub> and SOC<sub>fossil</sub>, especially in the warm period.” (page 20, line 5-12)

We conclude that “We suggest that WIOC<sub>fossil</sub> and WSOC<sub>fossil</sub> are probably a better approximation for primary and secondary fossil OC, respectively, than POC<sub>fossil</sub> and SOC<sub>fossil</sub> estimated using the EC tracer method” from the discussion in Sect 3.6 that:

“the most likely explanation for the difference between WIOC<sub>fossil</sub> and POC<sub>fossil</sub> is the overestimate of POC<sub>fossil</sub> by the EC tracer method. POC<sub>fossil</sub> is calculated by multiplying EC<sub>fossil</sub> with primary OC/EC ratios for fossil sources ( $r_{fossil}$  in Eq. 11). Thus, an overestimate of POC<sub>fossil</sub> result has two causes. First,  $r_{fossil}$  might be overestimated (as EC<sub>fossil</sub> is well constrained by <sup>14</sup>C), which could result either from a too high estimated fraction of coal burning in the warm period, or through rapid evaporation of POC at warmer temperatures. In the warm period, semi-volatile OC from fossil emission sources partitions more readily to the gas-phase leading to lower primary OC/EC ratios compared to winter. This is supported by laboratory studies and ambient observations, which find that the primary OC/EC ratio for vehicle emissions is lower in warm period than in winter (Xie et al., 2017; X. H. H. Huang et al., 2014). Second, during longer residence time in the atmosphere POC might not be chemically stable and  $r_{fossil}$  decreases with aging time in the atmosphere”. (page 18, line 7-16)

Further, the large uncertainties in  $r_{fossil}$  lead to large uncertainties in the resulted POC<sub>fossil</sub> and SOC<sub>fossil</sub>, but WIOC<sub>fossil</sub> and WSOC<sub>fossil</sub> are well-constrained by <sup>14</sup>C. So we decide to keep this sentence.

**Minor comments:**

22) Page 4, line 15: “< 0.2  $\mu\text{g m}^{-2}$ ) compared to the TC loading of the samples (13–246  $\mu\text{g m}^{-2}$ ”. Replace with “< 0.2  $\mu\text{g cm}^{-2}$ ) compared to the TC loading of the samples (13–246  $\mu\text{g cm}^{-2}$ ”

**Response:** Thank you for spotting out the typo. Corrected (page 4, line 16).

23) Pag.5 line 7: “WSOC can be calculated as the difference between OC and WIOC”. Unclear why this sentence is here. The previous reference to radiocarbon measurements is confusing (as radiocarbon determination is not carried out as difference, as explained on page 7)

**Response:** Thank you for pointing this out. We have rephrased the sentence to avoid confusion as follows:

“ $^{14}\text{C}$  values of WSOC are calculated from  $^{14}\text{C}$  values of OC and WIOC according to the isotope mass balance (Eq. 4)” (page 5, line 13-14)

**24)** Page 5, line 19: “By water-extraction, water-soluble OC (WSOC) is removed from filter pieces (Dusek et al., 2014)”. The role of WSOC removal as a key procedure for reducing the impact of possible pyrolysis on  $^{14}\text{C}$  measurements of EC merits to be better evidenced as a key step for the correct  $^{14}\text{C}$  in EC measurement. In the years 2012-2014 three thermal treatments were developed nearly in parallel and all of them identified WSOC removal as a key step for radiocarbon measurement on EC. Suitable reference should include also Zhang et al, 2012 (<https://doi.org/10.5194/acp-12-10841-2012>) and Bernardoni et al, 2013 (<http://dx.doi.org/10.1016/j.jaerosci.2012.06.001>). Please note that these were the methods object of the inter-comparison reported in the mentioned Zenker et al., 2017 papers.

**Response:** We have added Zhang et al. (2012) and Bernardoni et al. (2013) in the text, the revised manuscript shows:

“By water-extraction, water-soluble OC (WSOC) is removed from filter pieces ([Zhang et al., 2012](#); [Bernardoni et al., 2013](#); Dusek et al., 2014)”. (page 5, line 27-28)

Accordingly, Zhang et al. (2012) and Bernardoni et al. (2013) have been added to the reference list.

**25)** Page 10, lines 23-24: “Beijing shows a very different seasonal trend, where  $f_{\text{bb}}(\text{EC})$  was lowest in summer ( $\sim 7\%$ ) and increased to  $\sim 20\%$  during the rest of the year (Zhang et al., 2017)”. Please, introduce the sentence, e.g. “By comparison with literature data for Beijing”

**Response:** Done. The revised text shows:

“[By comparison with literature data for Beijing](#), Beijing shows a very different seasonal trend, where  $f_{\text{bb}}(\text{EC})$  was lowest in summer ( $\sim 7\%$ ) and increased to  $\sim 20\%$  during the rest of the year (Zhang et al., 2017).” (page 11, line 26-27)

**26)** Page 10 line 30 (and following): change “around” with “about”

**Response:** Corrected. There are 4 occasions (page 12, line 1, 3, 8; page 15, line 6).

**27)** Pag.16, line 1: “Fossil WIOC ( $\text{WIOC}_{\text{fossil}}$ ) and WSOC ( $\text{WSOC}_{\text{fossil}}$ ) has been used”. Change into “Fossil WIOC ( $\text{WIOC}_{\text{fossil}}$ ) and WSOC ( $\text{WSOC}_{\text{fossil}}$ ) have been used”

**Response:** Corrected (page 17, line 13).

**28)** Pag.16, line 26: “Thus, an overestimate of  $\text{POC}_{\text{fossil}}$  result have two causes”. Change into: “Thus, an overestimate of  $\text{POC}_{\text{fossil}}$  result has two causes.

**Response:** Corrected (page 18, line 10).

**29)** Pag. 17, line 27: “An increased contributions”. Change into: “An increased contribution”

**Response:** Done (page 19, line 11).



## References:

- Chow, J. C., Watson, J. G., Chen, L.-W. A., Chang, M. O., Robinson, N. F., Trimble, D., and Kohl, S.: The IMPROVE\_A temperature protocol for thermal/optical carbon analysis: maintaining consistency with a long-term database, *J. Air Waste Manage.*, 57, 1014–1023, 2007.
- Dusek, U., Monaco, M., Prokopiou, M., Gongriep, F., Hitzemberger, R., Meijer, H. A. J., and Röckmann, T.: Evaluation of a two-step thermal method for separating organic and elemental carbon for radiocarbon analysis, *Atmos. Meas. Tech.*, 7, 1943–1955, <https://doi.org/10.5194/amt-7-1943-2014>, 2014.
- Han, Y. M., Chen, L.W., Huang, R.J., Chow, J. C., Watson, J. G., Ni, H. Y., Liu, S. X., Fung, K. K., Shen, Z. X., Wei, C., Wang, Q. Y., Tian, J., Zhao, Z. Z., Prévôt, A. S. H., and Cao, J. J.: Carbonaceous aerosols in megacity Xi'an, China: implications of thermal/optical protocols comparison, *Atmos. Environ.*, 132, 58–68, 2016.
- Heal, M. R.: The application of carbon-14 analyses to the source apportionment of atmospheric carbonaceous particulate matter: a review, *Anal. Bioanal. Chem.*, 406, 81–98, 2014.
- Huang, L., Brook, J., Zhang, W., Li, S., Graham, L., Ernst, D., Chivulescu, A., and Lu, G.: Stable isotope measurements of carbon fractions (OC/EC) in airborne particulate: a new dimension for source characterization and apportionment, *Atmos. Environ.*, 40, 2690–2705, 2006.
- Levin, I., B. Kromer, and Hammer, S.: Atmospheric  $\Delta^{14}\text{CO}_2$  trend in Western European background air from 2000 to 2012, *Tellus B*, 65, 20092, [doi: 10.3402/tellusb.v65i0.20092](https://doi.org/10.3402/tellusb.v65i0.20092), 2013
- Levin, I., Naegler, T., Kromer, B., Diehl, M., Francey, R. J., Gomez-Pelaez, A. J., Steele, L., Wagenbach, D., Weller, R., and Worthy, D. E.: Observations and modelling of the global distribution and long-term trend of atmospheric  $^{14}\text{CO}_2$ , *Tellus B*, 62, 26–46, 2010.
- Lewis, C. W., Klouda, G. A., and Ellenson, W. D.: Radiocarbon measurement of the biogenic contribution to summertime PM-2.5 ambient aerosol in Nashville, TN, *Atmos. Environ.*, 38, 6053–6061, 2004.
- Mohn, J., Szidat, S., Fellner, J., Rechberger, H., Quartier, R., Buchmann, B., and Emmenegger, L.: Determination of biogenic and fossil  $\text{CO}_2$  emitted by waste incineration based on  $^{14}\text{CO}_2$  and mass balances, *Bioresource Technol.*, 99, 6471–6479, 2008.
- Wu, C. and Yu, J. Z.: Evaluation of linear regression techniques for atmospheric applications: the importance of appropriate weighting, *Atmos. Meas. Tech.*, 11, 1233–1250, [doi:10.5194/amt-11-1233-2018](https://doi.org/10.5194/amt-11-1233-2018), 2018.
- Zenker, K., Vonwiller, M., Szidat, S., Calzolari, G., Giannoni, M., Bernardoni, V., Jedynska, A. D., Henzing, B., Meijer, H. A., and Dusek, U.: Evaluation and inter-comparison of oxygen-based OC-EC separation methods for radiocarbon analysis of ambient aerosol particle samples, *Atmosphere*, 8, 226, <https://doi.org/10.3390/atmos8110226>, 2017.
- Zhao, Z., Cao, J., Zhang, T., Shen, Z., Ni, H., Tian, J., Wang, Q., Liu, S., Zhou, J., Gu, J., and Shen, G.: Stable carbon isotopes and levoglucosan for  $\text{PM}_{2.5}$  elemental carbon source apportionments in the largest city of Northwest China, *Atmos. Environ.*, 185, 253–261, <https://doi.org/10.1016/j.atmosenv.2018.05.008>, 2018.

### **Anonymous reviewer #3:**

The paper reports results of a 1-year source apportionment of carbonaceous aerosol fractions in a polluted Chinese city, based on radiocarbon ( $^{14}\text{C}$ ) and stable carbon isotope ( $\delta^{13}\text{C}$ ) measurements. Large focus is devoted to  $^{14}\text{C}$  source apportionment of WIOC and WSOC, and discussion on whether  $^{14}\text{C}$ -apportioned WIOC and WSOC can be used as proxies of primary emissions and secondary formation of OC, respectively. To my knowledge, there are limited  $^{14}\text{C}$  results of WIOC and WSOC in the literature, especially this study covers a full year cycle. The data and methodology are presented clearly and appear to be valid. The well-written manuscript is acceptable for publication after minor revisions.

1)  $^{14}\text{C}$  measurement is known to be expensive and time-consuming. In this study, only 3 samples/season (in total, 12 samples/year) were selected for  $^{14}\text{C}$  measurements of EC, OC and WIOC. How are those 12 samples representative of a year?

**Response:** We did the whole year measurement in Xi'an for the year 2015/2016. But we did not measure  $^{14}\text{C}$  for all samples, as  $^{14}\text{C}$  measurement is costly and time-consuming (we thank the reviewer for her/his awareness of this). In this study, to get the representative samples for  $^{14}\text{C}$  analysis, we selected samples with varying concentrations of carbonaceous aerosols for  $^{14}\text{C}$  analysis. The selected samples cover periods of low, medium and high TC concentrations to get samples representative of the various pollution conditions that did occur in each season. Each sample consists of 2 to 4 24 hr filter pieces with similar TC loadings (Fig. S1). The selected 12 samples for the year 2015/2016 cover 33 days.

In Xi'an, we see from this study (Table S1, Fig. 1) but also our earlier studies (Ni et al., 2018) that the  $F^{14}\text{C}$  values do not change very much between polluted days and clean days within each season, even though OC and EC mass concentrations varied considerably (Fig. 1). This increases our confidence that the selected samples are representative. Details on sample selection for  $^{14}\text{C}$  analysis are presented in Sect. 2.4.1.

2) Section 2.2. Are the samples corrected for field blanks?

**Response:** The average field blank of OC was  $0.9 \pm 0.2 \mu\text{g cm}^{-2}$  ( $n=6$ , equivalent to  $\sim 0.23 \pm 0.05 \mu\text{g m}^{-3}$ ), which was subtracted from the sample OC concentrations. EC on field blanks was in most cases below the detection level. We thus did not conduct the blank correction for EC concentrations. This description is added to the Sect. 2.2 (page 4, line 17–19).

According, we add the sampling information of field blanks in Method Sect. 2.1:

“Field blank filters were treated exactly like the sample filters, except that no air was drawn through the filter.” (page 3, line 30 to page 4, line 1)

3) Page 6, line 6-8. Why  $\delta^{13}\text{C}$  of  $-25\text{‰}$  is used to correct isotope fractionation?

**Response:** We report the  $^{14}\text{C}$  results of our aerosol samples as fraction modern ( $F^{14}\text{C}$ ), following the nomenclature of Reimer et al. (2004). The normalizations of samples and the standards (i.e., OXII) to  $\delta^{13}\text{C} = -25 \text{‰}$  with respect to V-PDB is implicit in the definition of this unit and if we

chose another value our  $^{14}\text{C}$  values would not be reported in fraction modern, but some non standard unit.  $\delta^{13}\text{C} = -25 \text{ ‰}$  is chosen for normalization for isotope fractionations because it is a representative average of the majority of organic samples in nature (Stuiver and Polach, 1977; Mook and van der Plicht, 1999).

The revised text shows:

“The  $^{14}\text{C}/^{12}\text{C}$  ratio of an aerosol sample is usually normalized to the  $^{14}\text{C}/^{12}\text{C}$  ratio of an oxalic acid standard (OXII) and expressed as fraction modern ( $F^{14}\text{C}$ ). Following the definition of fraction modern (Mook and van der Plicht, 1999; Reimer et al., 2004), the  $^{14}\text{C}/^{12}\text{C}$  ratio of OXII is related to the unperturbed atmosphere in the reference year of 1950 by multiplying it with a factor of 0.7459:

$$F^{14}\text{C} = \frac{(^{14}\text{C}/^{12}\text{C})_{\text{sample},[-25]}}{0.7459 \times (^{14}\text{C}/^{12}\text{C})_{\text{OXII},[-25]}} \quad (2)$$

where the  $^{14}\text{C}/^{12}\text{C}$  ratio of the sample and OXII are both corrected for machine background and normalized to  $\delta^{13}\text{C} = -25 \text{ ‰}$  with respect to V-PDB to correct for isotope fractionation.  $\delta^{13}\text{C} = -25 \text{ ‰}$  is the postulated mean value of terrestrial wood (Stuiver and Polach, 1977).” (page 6, line 13-20)

4) Page 7, line 2. “ $M_{\text{OC}}$  is measured by the thermal-optical method as described in Sect. 2.2”. In Sect. 2.2, EUSAAR\_2 protocol is used. In Sect. 2.4.2, for  $^{14}\text{C}$  measurement, OC is extracted by heating filter samples in  $\text{O}_2$  at  $375^\circ\text{C}$ . So I see two different protocols. How comparable are they?

**Response:** EUSAAR\_2 protocol has been used as a reference method to measure OC and EC concentrations in aerosol samples (Cavalli et al., 2010). In EUSAAR\_2 protocol, OC fractions are desorbed in inert helium (He) atmosphere in different steps up to  $650^\circ\text{C}$ . A laser transmission signal is used for correction of charred OC. Mass concentration of OC in aerosol samples ( $M_{\text{OC}}$ ) is determined by subtracting the charred OC from the sum of OC fractions desorbed in He.

However, most OC/EC extraction systems for  $^{14}\text{C}$  measurements including our aerosol combustion system (ACS) do not have the laser to distinguish between OC and EC. For  $^{14}\text{C}$  measurement, OC is extracted by heating filter samples in  $\text{O}_2$  at  $375^\circ\text{C}$  using our ACS and is assumed to be representative of OC (Dusek et al., 2014). The OC combustion temperature of  $375^\circ\text{C}$  in the ACS is highly likely not high enough to recover 100 % of OC, despite the high combustion efficiency of carbon in  $\text{O}_2$ . Thus, the OC mass extracted using ACS ( $M_{\text{OC},e}$ ) is usually lower than  $M_{\text{OC}}$ . By dividing  $M_{\text{OC},e}$  with  $M_{\text{OC}}$  we can estimate the OC recovery. The OC recovery in this study is on average  $75 \pm 5 \%$ .

Our earlier study (Dusek et al., 2014) and we recently test  $F^{14}\text{C}_{(\text{OC})}$  as a function of OC combustion temperature on ACS, using test filters collected in China and Europe. We found that no change in  $F^{14}\text{C}_{(\text{OC})}$  up to  $400^\circ\text{C}$ , even though we extracted more OC at higher temperatures.

This indicates that the  $F^{14}C_{(OC)}$  is representative of ambient OC samples. Any further increase in OC combustion temperature (i.e., higher than 400 °C) has the risk to burn out less refractory EC as well. Due to the fact that ambient OC and EC have very different  $F^{14}C$ , a small mixture of EC into OC can lead to a biased  $F^{14}C$  of OC.

5) Page 7, line 10-11. “The most likely value of  $M_{WIOC}$  is chosen at  $M1_{WIOC} + 2/3 \times (M2_{WIOC} - M1_{WIOC})$ , because it is more likely that WIOC has a similar recovery as OC rather than 100% recovery”. Do you have any evidence to support this statement? I care this because the estimated  $M_{WIOC}$  is used in Eq. 4 to determine the  $F^{14}C$  and mass of WSOC.

**Response:** Thank you for this comment. To validate this statement, we did the water-extraction for sample Winter-M and Autumn-H to remove WSOC. Then the WIOC amount (referred to as  $M_{WIOC\_WE}$ ) on the water-extracted filter samples was measured directly following the same procedures of non-treated samples.

We find that the directly measured  $M_{WIOC\_WE}$  is closer to  $M2_{WIOC}$  than to  $M1_{WIOC}$  (Table R1). This suggests that it is more likely that WIOC has a similar recovery as OC (i.e., assumption used to estimate  $M2_{WIOC}$ ) rather than 100% recovery (i.e., assumption used to estimate  $M1_{WIOC}$ ).

Due to the limited filter materials, we could not measure  $M_{WIOC\_WE}$  for all the samples. In this study,  $M_{WIOC}$  is assumed to vary from  $M1_{WIOC}$  to  $M2_{WIOC}$ . The most likely value of  $M_{WIOC}$  is chosen at  $M1_{WIOC} + 2/3 \times (M2_{WIOC} - M1_{WIOC})$ . Once  $M_{WIOC}$  is estimated, the  $F^{14}C_{(WSOC)}$  can be calculated following the Eq. (4). The best estimate and ranges of  $F^{14}C_{(WSOC)}$  is presented in Fig. S2 and Table S1.  $F^{14}C_{(WSOC)}$  is only slightly sensitive to  $M_{WIOC}$ . If we shift the  $M_{WIOC}$  from  $M1_{WIOC}$  to  $M2_{WIOC}$ , the average values of  $F^{14}C_{(WSOC)}$  only change by less than 0.03 (absolute differences). The underlined sentences have been added to the Sect. 2.5 (page 7, line 25–26).

**Table R1.** Mass concentrations of WIOC ( $M_{WIOC}$ ) for sample Winter-M and Autumn-H. See details in estimation of  $M1_{WIOC}$  and  $M2_{WIOC}$  in Sect. 2.5. In this study, we chose  $M1_{WIOC} + 2/3 \times (M2_{WIOC} - M1_{WIOC})$  as the most likely value of  $M_{WIOC}$ .  $M_{WIOC\_WE}$  is the directly measured  $M_{WIOC}$  on water-extracted filters.

| Sample Name | $M1_{WIOC}$<br>( $\mu\text{g m}^{-3}$ ) | $M2_{WIOC}$<br>( $\mu\text{g m}^{-3}$ ) | $M1_{WIOC} + 2/3 \times (M2_{WIOC} - M1_{WIOC})$<br>( $\mu\text{g m}^{-3}$ ) | Directly measured $M_{WIOC}$<br>(referred to as $M_{WIOC\_WE}$ )<br>( $\mu\text{g m}^{-3}$ ) |
|-------------|-----------------------------------------|-----------------------------------------|------------------------------------------------------------------------------|----------------------------------------------------------------------------------------------|
| Winter-M    | 13.1                                    | 18.7                                    | 16.8                                                                         | 18.2                                                                                         |
| Autumn-H    | 9.0                                     | 11.0                                    | 10.4                                                                         | 10.8                                                                                         |

6) Page 7, line 14-20. Conversion factors are applied to convert  $F^{14}C$  to the relative contribution of non-fossil sources to EC/OC. The conversion factors are  $F^{14}C_{bb}$  ( $= 1.10 \pm 0.05$ ) for EC and  $F^{14}C_{nf}$  ( $= 1.09 \pm 0.05$ ) for OC, respectively. Why are the two conversion factors slightly different? I suggest the authors to explain this clearly in the method section.

**Response:**  $F^{14}C_{nf}$  ( $1.09 \pm 0.05$ ) for OC is slightly smaller than  $F^{14}C_{bb}$  ( $1.10 \pm 0.05$ ) for EC, because except biomass burning, biogenic emissions also contribute to OC, but have a smaller  $F^{14}C$  than that of biomass burning. This is clarified in the Method Sect. 2.5:

“ $F^{14}C_{bb}$  represents  $F^{14}C$  of biomass burning including wood burning and crop residue burning.” (page 7, line 29)

“ $F^{14}C_{nf}$  is  $F^{14}C$  of non-fossil sources include both biomass burning and biogenic emissions.” (page 8, line 9-10)

“ $F^{14}C_{nf}$  is thus estimated as  $1.09 \pm 0.05$  (Lewis et al., 2004; Levin et al., 2010; Y. L. Zhang et al., 2014). The central value of 1.09 corresponds to 15% contribution of biogenic OC to OC.” (page 8, line 13-14)

7) Page 9, line 15-16. Are the measurement uncertainties of  $F^{14}C_{(EC)}$  and  $\delta^{13}C_{EC}$  considered in the MCMC calculations?

**Response:** The measurement uncertainties of  $F^{14}C_{(EC)}$  and  $\delta^{13}C_{EC}$  are inputs of MCMC and thus are considered in the MCMC calculations. This is clarified in the Method Sect. 2.6 by adding the following underlined sentence:

“The MCMC technique takes into account the variability in the source signatures of  $F^{14}C$  and  $\delta^{13}C$  (Parnell et al., 2010, 2013), where  $\delta^{13}C$  introduces a larger uncertainty than  $F^{14}C$ . Uncertainties of  $\delta^{13}C_{bb}$ ,  $\delta^{13}C_{liq.fossil}$ ,  $\delta^{13}C_{coal}$  and  $F^{14}C_{bb}$  as well as the measured ambient  $\delta^{13}C_{EC}$  and  $F^{14}C_{(EC)}$  are propagated.” (page 10, line 15-16)

Consequently, we add the uncertainties of  $\delta^{13}C_{EC}$  in Table S1.

**Technical comments:**

8) Page 4, line 1. “a” between “in” and “pre-baked” should be deleted.

**Response:** Corrected. (page 4, line 2)

9) Page 8, line 8. To be consistent with the text, I think it should a comma in “ $OC_{o,nf}$ ” in Eq. (8). Please check all instances

**Response:** Thank you for your careful reading. This is corrected in Eq. (8).

There are also several occasions in the rest of the manuscript, and the revised manuscript shows:

“As for OC from secondary origin (i.e.,  $SOC_{fossil}$  and  $OC_{o,nf}$ ),” (page 16, line 5)

**Figure 7. (a)** The estimated mass concentrations of  $POC_{bb}$ ,  $OC_{o,nf}$ ,  $POC_{fossil}$ ,  $SOC_{fossil}$  ( $\mu g m^{-3}$ ) in total OC of  $PM_{2.5}$  samples. The error bars indicate the interquartile range (25th–75th percentile) of the median values. **(b)** The percentage of  $POC_{bb}$ ,  $OC_{o,nf}$ ,  $POC_{fossil}$ ,  $SOC_{fossil}$  in total OC. **(c)** Average source apportionment results of OC in each season and over the year. The numbers below the pie charts represent the seasonally/annually averaged OC concentrations.” (page 35)

**Figure S3. (a)** An example probability density functions (PDFs) of concentrations of  $POC_{fossil}$  (red),  $SOC_{fossil}$  (light blue) for sample Autumn-L. **(b)** PDFs of concentrations of and  $OC_{o,nf}$  (light blue) and  $POC_{bb}$  (red) for the same sample.” (page S6 in the Supplement)

**10).** Page 8, line 11. A citation is missing for the statement that “In most cases, contributions of primary biogenic OC to PM<sub>2.5</sub> are likely small”.

**Response:** We add Gelencsér et al. (2007) and Guo et al. (2012). (page 9, line 6)

The new citations are included in the revised reference list:

Gelencsér, A., May, B., Simpson, D., Sánchez-Ochoa, A., Kasper-Giebl, A., Puxbaum, H., Caseiro, A., Pio, C., and Legrand, M.: Source apportionment of PM<sub>2.5</sub> organic aerosol over Europe: Primary/secondary, natural/anthropogenic, and fossil/biogenic origin, *J. Geophys. Res.*, 112, D23S04, doi:10.1029/2006JD008094, 2007.

Guo, S., Hu, M., Guo, Q., Zhang, X., Zheng, M., Zheng, J., Chang, C. C., Schauer, J. J., and Zhang, R.: Primary sources and secondary formation of organic aerosols in Beijing, China, *Environ. Sci. Technol.*, 46, 9846–9853, 2012.

**11)** Page 8, line 19. It should be “combining” instead of “combing”.

**Response:** Thank you for spotting this typo. Corrected (page 9, line 14).

**12)** Page 8, line 25. Give full name of PDF, because it is used for the first time in this manuscript. The authors should check the manuscript again for proper use of abbreviations.

**Response:** We now explain PDF the first time it is used in this revised manuscript:

“For  $p$  values, random values from the respective probability density function (PDF) of  $p$  were used” (page 9, line 20-21)

After the first appearance of the abbreviation, the abbreviation PDF is used in the rest of the manuscript:

“The results of the MCMC calculations are the posterior PDFs for  $f_{bb}$ ,  $f_{liq.fossil}$  and  $f_{coal}$ ” (page 10, line 16-17)

**13)** Page 10, line 22. “a slightly lower value” instead of “a slightly lower values”

**Response:** In response of question (9) from reviewer #1, to be specify, we revised the text and delete the sentence “with a slightly lower value in spring ( $14 \pm 3\%$ )”:

“ $f_{bb}(EC)$  is higher in winter ( $28 \pm 4\%$ ) than that in other seasons (i.e., warm period, on average  $15 \pm 2\%$ ).” (page 11, line 24-25)

**14)** Page 17, line 23. “various carbonaceous aerosol fractions”

**Response:** Done (page 19, line 7).

**15)** Page 17, line 27. “An increased contribution of non-fossil sources to all carbon fractions was observed”

**Response:** Corrected (page 19, line 11).

## References:

Cavalli, F., Viana, M., Yttri, K. E., Genberg, J., and Putaud, J.-P.: Toward a standardised thermal-optical protocol for measuring atmospheric organic and elemental carbon: the EUSAAR protocol, *Atmos. Meas. Tech.*, 3, 79-89, <https://doi.org/10.5194/amt-3-79-2010>, 2010.

Dusek, U., Monaco, M., Prokopiou, M., Gongriep, F., Hitzenberger, R., Meijer, H. A. J., and Röckmann, T.: Evaluation of a two-step thermal method for separating organic and elemental carbon for radiocarbon analysis, *Atmos. Meas. Tech.*, 7, 1943–1955, <https://doi.org/10.5194/amt-7-1943-2014>, 2014.

Mook, W. G. and van der Plicht, J.: Reporting  $^{14}\text{C}$  activities and concentrations, *Radiocarbon*, 41, 227–239, 1999.

Ni, H., Huang, R.-J., Cao, J., Liu, W., Zhang, T., Wang, M., Meijer, H. A. J., and Dusek, U.: Source apportionment of carbonaceous aerosols in Xi'an, China: insights from a full year of measurements of radiocarbon and the stable isotope  $^{13}\text{C}$ , *Atmos. Chem. Phys.*, 18, 16363–16383, <https://doi.org/10.5194/acp-18-16363-2018>, 2018.

Reimer, P. J., Brown, T. A., and Reimer, R. W.: Discussion: reporting and calibration of post-bomb  $^{14}\text{C}$  data, *Radiocarbon*, 46, 1299–1304, 2004.

Stuiver, M. and Polach, H. A.: Discussion: Reporting of  $^{14}\text{C}$  data, *Radiocarbon*, 19, 355–363, 1977.

# Sources and formation of carbonaceous aerosols in Xi'an, China: primary emissions and secondary formation constrained by radiocarbon

Haiyan Ni<sup>1,2,3</sup>, Ru-Jin Huang<sup>1\*</sup>, Junji Cao<sup>1</sup>, Jie Guo<sup>1</sup>, Haoyue Deng<sup>2</sup>, Ulrike Dusek<sup>2</sup>

5 <sup>1</sup>State Key Laboratory of Loess and Quaternary Geology, Key Laboratory of Aerosol Chemistry and Physics, Center for Excellence in Quaternary Science and Global Change, Institute of Earth Environment, Chinese Academy of Sciences, Xi'an, 710061, China

<sup>2</sup>Centre for Isotope Research (CIO), Energy and Sustainability Research Institute Groningen (ESRIG), University of Groningen, Groningen, 9747 AG, the Netherlands

10 <sup>3</sup>University of Chinese Academy of Sciences, Beijing, 100049, China

*Correspondence to:* rujin.huang@ieecas.cn

**Abstract.** To investigate the sources and formation mechanisms of carbonaceous aerosols, a major contributor to severe particulate air pollution, radiocarbon (<sup>14</sup>C) measurements were conducted on aerosols sampled from November 2015 to November 2016 in Xi'an, China. Based on the <sup>14</sup>C content in elemental carbon (EC), organic carbon (OC) and water-  
15 insoluble OC (WIOC), contributions of major sources to carbonaceous aerosols are estimated over a whole seasonal cycle: primary and secondary fossil sources, primary biomass burning, and other non-fossil carbon formed mainly from secondary processes. Primary fossil sources of EC were further sub-divided into coal and liquid fossil fuel combustion by complementing <sup>14</sup>C data with stable carbon isotopic signatures.

The dominant EC source was liquid fossil fuel combustion (i.e., vehicle emissions), accounting for 64% (median; 45–74%,  
20 interquartile range) of EC in autumn, 60% (41–72%) in summer, 53% (33–69%) in spring and 46% (29–59%) in winter, respectively. An increased contribution from biomass burning to EC was observed in winter (~28%) compared to other seasons (warm period; ~15%). In winter, coal combustion (~25%) and biomass burning equally contributed to EC, whereas in the warm period, coal combustion accounted for a larger fraction of EC than biomass burning. The relative contribution of fossil sources to OC was consistently lower than that to EC, with an annual average of  $47 \pm 4\%$ . Non-fossil OC of secondary  
25 origin was an important contributor to total OC ( $35 \pm 4\%$ ) and accounted for more than half of non-fossil OC ( $67 \pm 6\%$ ) throughout the year. Secondary fossil OC (SOC<sub>fossil</sub>) concentrations were higher than primary fossil OC (POC<sub>fossil</sub>) concentrations in winter, but lower than POC<sub>fossil</sub> in the warm period.

Fossil WIOC and water-soluble OC (WSOC) have been widely used as proxies for POC<sub>fossil</sub> and SOC<sub>fossil</sub>, respectively. This assumption was evaluated by (1) comparing their mass concentrations with POC<sub>fossil</sub> and SOC<sub>fossil</sub>, and (2) comparing ratios  
30 of fossil WIOC to fossil EC to typical primary OC to EC ratios from fossil sources including both coal combustion and vehicle emissions. The results suggest that fossil WIOC and fossil WSOC are probably a better approximation for primary and secondary fossil OC, respectively, than POC<sub>fossil</sub> and SOC<sub>fossil</sub> estimated using the EC tracer method.



## 1. Introduction

Carbonaceous aerosols are an important component of  $PM_{2.5}$  (particles with aerodynamic diameter  $<2.5 \mu m$ ), constituting typically 20–50% of  $PM_{2.5}$  mass in many urban areas in China (Cao et al., 2012; R. J. Huang et al., 2014; Tao et al., 2017). The total carbon content of carbonaceous aerosols (TC) is operationally classified into elemental carbon (EC) and organic carbon (OC) (Pöschl, 2005). EC is emitted as primary aerosols from incomplete combustion of biomass (e.g., wood, crop residues, and grass) and fossil fuels (e.g., coal, gasoline and diesel). In addition to these combustion sources, OC has other non-combustion sources, for example, biogenic emissions, cooking, etc. Unlike EC that is exclusively emitted as primary aerosols, OC includes both primary and secondary OC (POC and SOC, respectively), where SOC is formed in the atmosphere by chemical reaction and gas-to-particle conversion of volatile organic compounds (VOCs) from non-fossil (e.g., biomass burning, biogenic emissions, and cooking) and fossil sources (Jacobson et al., 2000; Kanakidou et al., 2005; Hallquist et al., 2009). Moreover, OC can be separated into water-soluble OC (WSOC) and water-insoluble OC (WIOC), according to water solubility of OC.

High concentrations of carbonaceous aerosols have been observed during severe air pollution events in China (R. J. Huang et al., 2014; Elser et al., 2016; Liu et al., 2016a, 2016b). Knowledge and understanding of the sources and formation processes of carbonaceous aerosols, which remain unclear due to the complicated chemical composition, are highly needed to improve air quality. Clear-cut separation between fossil and non-fossil sources of carbonaceous aerosols can be successfully achieved by radiocarbon measurement (Gustafsson et al., 2009; Szidat et al., 2009; Dusek et al., 2013). Radiocarbon ( $^{14}C$ ) source apportionment exploits the fact that carbonaceous aerosol emitted from fossil sources (e.g., coal combustion, vehicle emissions) does not contain  $^{14}C$ , whereas carbonaceous aerosol released from non-fossil (or “contemporary”) sources has a typical contemporary  $^{14}C$  signature. Radiocarbon studies show that a sizeable fraction of carbonaceous aerosols is from non-fossil origins, even for aerosols collected in urban areas (Heal, 2014; Cao et al., 2017). For example, Zhang et al. (2015b) found that  $48 \pm 9\%$  total carbonaceous aerosols were contributed by non-fossil sources in urban areas of 4 large Chinese cities in winter of 2013.  $^{14}C$  measurements conducted in early winter in 10 Chinese cities show that on average  $65 \pm 7\%$  total carbonaceous aerosols were derived from non-fossil sources (Liu et al., 2017). When  $^{14}C$  analysis is conducted for OC and EC separately, contributions from biomass burning and other non-fossil sources to carbonaceous aerosols can be separated for a more comprehensive source apportionment.

$^{14}C$  measurements on either WIOC or WSOC can help to separate primary from secondary OC from fossil sources. Fossil sources tend to mainly produce WIOC in primary emissions (Weber et al., 2007; Dai et al., 2015; Yan et al., 2017). Therefore, fossil WIOC ( $WIOC_{fossil}$ ) can be used as a proxy of fossil POC ( $POC_{fossil}$ ). WSOC can be directly emitted as primary aerosols mainly from biomass burning or produced as SOC. There is evidence that SOC produced through the oxidation of VOCs followed by gas-to-particle conversion contains more polar compounds and thus may be an important source of WSOC (Miyazaki et al., 2006; Sannigrahi et al., 2006; Kondo et al., 2007; Weber et al., 2007). Fossil WSOC

(WSOC<sub>fossil</sub>) therefore is thought to be a good proxy of fossil SOC (SOC<sub>fossil</sub>). <sup>14</sup>C analysis of WIOC and WSOC can therefore provide new insights into sources and formation processes of primary and secondary OC, respectively, and has been applied in several source apportionment studies (e.g., Liu et al., 2016a, 2016b; Dusek et al., 2017; Liu et al., 2017). For example, using this approach, Y. L. Zhang et al. (2014) found that secondary fossil OC dominates total fossil OC in a background site in southern China. Measurements in 4 Chinese megacities highlight the importance of secondary formation to both fossil and non-fossil WSOC in severe winter haze episodes, by combining <sup>14</sup>C measurements of WSOC with positive matrix factorization of aerosol mass spectrometer data (Zhang et al., 2018).

<sup>14</sup>C measurements on EC allow direct separation of fossil and biomass burning source contributions. In addition, analysis of the stable carbon isotopic composition (namely the <sup>13</sup>C/<sup>12</sup>C ratio, expressed as δ<sup>13</sup>C in Eq. 1) of EC can be used to separate fossil sources into coal and liquid fossil fuel combustion (i.e., vehicle emissions), because EC from coal combustion is on average more enriched in the stable carbon isotope <sup>13</sup>C compared to liquid fossil fuel combustion (Andersson et al., 2015; Winiger et al., 2015, 2016; Fang et al., 2018). The interpretation of the stable carbon isotope signature for OC source apportionment is more difficult, because OC is chemically reactive and δ<sup>13</sup>C signatures of OC are not only determined by the source signatures but also influenced by chemical reactions of the organic compounds in the atmosphere (Irei et al., 2011; Pavuluri and Kawamura, 2016).

In this study, one-year PM<sub>2.5</sub> samples collected from Xi'an, China are investigated. Xi'an is the largest city in northwest China and is also one of the most polluted cities in the world. We present, to our best knowledge, the first ~~1-year~~<sup>14</sup>C measurements covering all four seasons that distinguish fossil and non-fossil contributions to various carbon fractions, including EC, OC, WIOC and WSOC in Xi'an. Fossil sources of EC are further divided into coal and liquid fossil fuel combustion by complementing radiocarbon with the stable carbon isotopic signature. Concentrations of POC<sub>fossil</sub> and SOC<sub>fossil</sub> are modeled based on the <sup>14</sup>C-apportioned OC and EC and compared with their widely used proxies, i.e., <sup>14</sup>C-apportioned WIOC<sub>fossil</sub> and WSOC<sub>fossil</sub>, respectively.

## 2. Methods

### 2.1 Sampling

Sampling was conducted in Xi'an, China from 30 November 2015 to 17 November 2016. PM<sub>2.5</sub> samples were collected on the rooftop (~10 m) of a two-floor building located at the Institute of Earth Environment, Chinese Academy of Sciences (34.2° N, 108.9° E). This site is a typical urban background site surrounded by residential and education areas. The 24 h integrated PM<sub>2.5</sub> samples were collected from 10:00 to 10:00 the next day (local standard time, LST). PM<sub>2.5</sub> samples were collected on pre-baked (780 °C for 3 h) quartz fiber filter (QM/A, Whatman Inc., Clifton, NJ, USA, 20.3 cm × 25.4 cm) using a high-volume sampler (TE-6070 MFC, Tisch Inc., Cleveland, OH, USA) at a flow rate of 1.0 m<sup>3</sup> min<sup>-1</sup>. Field blank

[filters were treated exactly like the sample filters, except that no air was drawn through the filter.](#) After collection, the filters ~~sample were~~ immediately removed from the sampler, packed in ~~a~~ pre-baked aluminum foils (450 °C for 3 h), sealed in polyethylene bags and stored in a freezer at -18 °C until analysis.

## 2.2 Thermal/optical organic carbon (OC) and elemental carbon (EC) analysis

5 Filter pieces of 1.5 cm<sup>2</sup> were taken for OC and EC analysis using a carbon analyzer (Model 5L, Sunset Laboratory, Inc., Portland, OR, USA) following the thermal-optical transmittance protocol EUSAAR\_2 (Cavalli et al., 2010). In the EUSAAR\_2 protocol the filter sample is heated stepwise in an inert helium (He) atmosphere up to 650 °C to thermally desorb organic compounds. After a rapid cooling to 500 °C the sample is heated again stepwise up to 850 °C in an oxidizing 98% He/2% O<sub>2</sub> atmosphere to oxidize EC. All carbon gases are converted to CO<sub>2</sub> and detected with a non-dispersive infrared  
10 (NDIR) detector. During heating in the inert He atmosphere, a fraction of OC pyrolyzes (chars) to light-absorbing EC, as demonstrated by decreasing transmission signal. When the charred OC and original EC are released in the He/O<sub>2</sub> atmosphere, transmission signal increases again. The split between OC and EC is set when the transmission signal reaches their pre-pyrolysis value. The sum of OC and EC is total carbon (TC).

At the beginning of each work day, the instrument is calibrated using a sucrose standard solution. The instrument blank, representing the background contamination of the instrument during the analysis, is measured every day and negligible (TC  
15 < 0.2 µg cm<sup>-2</sup>) compared to the TC loading of the samples (13–246 µg cm<sup>-2</sup>; range). The reproducibility determined by duplicate analysis of the filter samples was within 6% for OC and 5% for EC. [The average field blank of OC was 0.9 ± 0.2 µg cm<sup>-2</sup> \(N=6, equivalent to ~ 0.23 ± 0.05 µg m<sup>-3</sup>\), which was subtracted from the sample OC concentrations. EC on field blanks was in most cases below the detection level.](#) Details of the OC/EC measurement can also be found in Zenker et al.  
20 (2017).

## 2.3 Stable carbon isotopic composition of EC

The stable carbon isotopic composition of EC was measured at the Stable Isotope Laboratory at the Institute of Earth Environment, Chinese Academy of Sciences. To remove OC, filter pieces were heated at 375 °C for 3 h in a vacuum-sealed quartz tube in the presence of CuO catalyst grains. Extraction of EC was done by heating the carbon that remained on the  
25 filters at 850 °C for 5 h [in another vacuum-sealed quartz tube](#). The resulting CO<sub>2</sub> from EC was isolated by a series of cold traps and quantified manometrically. The stable carbon isotopic composition of the purified CO<sub>2</sub> was determined as δ<sup>13</sup>C (δ<sup>13</sup>C<sub>EC</sub> for EC) by offline analysis with a Finnigan MAT-251 mass spectrometer (Bremen, Germany). δ<sup>13</sup>C values are expressed in the delta notation as per mil (‰) deviation from the international standard Vienna Pee Dee Belemnite (V-PDB):

$$30 \quad \delta^{13}\text{C} (\text{‰}) = \left[ \frac{(^{13}\text{C}/^{12}\text{C})_{\text{sample}}}{(^{13}\text{C}/^{12}\text{C})_{\text{V-PDB}}} - 1 \right] \times 1000. \quad (1)$$

A routine laboratory working standard with a known  $\delta^{13}\text{C}$  value was measured every day. The analytical precision of  $\delta^{13}\text{C}$  was better than  $\pm 0.3$  ‰ based on duplicate analyses. Details of stable carbon isotope measurements are described in our previous studies (Cao et al., 2011, 2013; Ni et al., 2018).

5 [Pyrolyzed OC can be formed through charring during the OC removal procedure and is released at the high temperature of EC step. To assess the potential effect of pyrolyzed OC on the measured  \$\delta^{13}\text{C}\_{\text{EC}}\$ , we conducted a sensitivity analysis based on isotope mass balance \(See details in the Supplemental S1\). This analysis shows that even for high contribution from pyrolyzed OC to the isolated EC of 20%, the expected difference in  \$\delta^{13}\text{C}\$  between measured EC and true EC is <1‰.](#)

## 2.4 Radiocarbon ( $^{14}\text{C}$ ) measurements of OC, WIOC and EC

### 2.4.1 Sample selection for $^{14}\text{C}$ analysis

10 For  $^{14}\text{C}$  analysis of OC, WIOC and EC, 3 composite samples per season were selected to represent high (H), medium (M) and low (L) concentrations of total carbon (TC = OC + EC), to cover various pollution conditions in each season. Each composite sample consists of 2 to 4 24 h filter pieces with similar TC loadings and air mass backward trajectories (Fig. S1, Table S1). In total, 36 radiocarbon data were measured, including 12 OC, 12 WIOC and 12 EC.  [\$^{14}\text{C}\$  values of WSOC are calculated from  \$^{14}\text{C}\$  values of OC and WIOC according to the isotope mass balance \(Eq. 4\). WSOC can be calculated as the](#)  
15 [difference between OC and WIOC.](#)

### 2.4.2 Extraction of OC, WIOC and EC

OC, WIOC and EC extractions were conducted on our custom-built aerosol combustion system (ACS). The ACS has been described in detail by Dusek et al. (2014) and evaluated in two intercomparison studies (Szidat et al., 2013; Zenker et al., 2017). In brief, the ACS consists of a reaction tube and a  $\text{CO}_2$  purification line. In the reaction tube aerosol filter samples are  
20 inserted into a filter holder and heated at different temperatures in pure  $\text{O}_2$ . Combustion products are fully oxidized using a platinum catalyst. The resulting  $\text{CO}_2$  is separated from other gases (e.g.,  $\text{NO}_x$ , water vapor) in the purification line. Here,  $\text{NO}_x$  and liberated halogens are first removed by a heated oven (650 °C) filled with copper grains and silver, water is then removed by a U-type tube cooled with dry ice-ethanol mixture (around -70 °C) and a flask containing phosphorus pentoxide ( $\text{P}_2\text{O}_5$ ). The amount of purified  $\text{CO}_2$  is determined manometrically in a calibrated volume and  $\text{CO}_2$  is subsequently stored in  
25 flame-sealed glass ampoules.

OC is combusted by heating filter pieces at 375 °C for 10 min. WIOC and EC are combusted from water-extracted filter pieces. By water-extraction, water-soluble OC (WSOC) is removed from filter pieces ([Zhang et al., 2012; Bernardoni et al., 2013; Dusek et al., 2014](#)). For WIOC, a water-extracted filter piece is heated at 375 °C for 10 minutes. Subsequently, the oven temperature is increased to 450 °C for 3 min to remove the most refractory OC that left on the filter. However, during  
30 this step some less refractory EC might be lost. After this step, OC has been completely removed from the filter pieces.

Finally, the remaining EC is combusted by heating the filter at 650 °C in O<sub>2</sub> for 5 min (Dusek et al., 2017; Zenker et al., 2017). [EC recovery after the intermediate 450 °C step was approximately 70%, estimated by comparing to the EC quantified by EUSAAR 2 protocol.](#)

Contamination during the extraction procedure is determined by following the same extraction procedures with either empty filter boat or pre-heated filters (at 650 °C in O<sub>2</sub> for 10 min). The contamination yields on average 0.85 µgC OC, 0.73 µgC WIOC and 0.72 µgC EC per extraction, respectively. Compared with our sample size of 45–210 µgC OC, 45–328 µgC WIOC and 15–184 µgC EC, the contamination is relatively small (<5 % of the sample amount).

### 2.4.3 <sup>14</sup>C measurements by accelerator mass spectrometer (AMS)

<sup>14</sup>C measurements were conducted using the the Mini Carbon Dating System (MICADAS) AMS at the Centre for Isotope Research at the University of Groningen. The extracted CO<sub>2</sub> is released from the glass ampules and captured by a zeolite trap within a gas inlet system (Ruff et al., 2007), where the sample is diluted using He to 5% CO<sub>2</sub> (Salazar et al., 2015). The CO<sub>2</sub>/He mixture is directly introduced into the Cs sputter ion sources of the MICADAS at a constant rate (Synal et al., 2007).

The <sup>14</sup>C/<sup>12</sup>C ratio of an aerosol sample is usually normalized to the <sup>14</sup>C/<sup>12</sup>C ratio of an oxalic acid standard (OXII) and expressed as fraction modern (F<sup>14</sup>C). [Following the definition of fraction modern \(Mook and van der Plicht, 1999; Reimer et al., 2004\),](#) the <sup>14</sup>C/<sup>12</sup>C ratio of OXII is related to the unperturbed atmosphere in the reference year of 1950 by multiplying it with a factor of 0.7459 [\(Mook and Van Der Plicht, 1999; Reimer et al., 2004\):](#)

$$F^{14}\text{C} = \frac{(^{14}\text{C}/^{12}\text{C})_{\text{sample},[-25]}}{0.7459 \times (^{14}\text{C}/^{12}\text{C})_{\text{OXII},[-25]}} \quad (2)$$

where the <sup>14</sup>C/<sup>12</sup>C ratio of the sample and OXII are both corrected for machine background and normalized to δ<sup>13</sup>C = -25 ‰ [with respect to V-PDB](#) to correct for isotope fractionation. [δ<sup>13</sup>C = -25 ‰ is the postulated mean value of terrestrial wood \(Stuiver and Polach, 1977\).](#)

The F<sup>14</sup>C values are corrected for memory effect (Wacker et al., 2010) using alternate measurements of OXII and <sup>14</sup>C-free material as gaseous standards. Correction for instrument background (Salazar et al., 2015) is done by subtracting the memory corrected F<sup>14</sup>C values of the <sup>14</sup>C-free standard. Finally, the values are normalized to the average value of the (memory and background corrected) OXII standards. A set of secondary standards is used to assess the robustness and reliability of the data. This includes IAEA-C7 with a consensus value of F<sup>14</sup>C = 0.4953 ± 0.0012 and sample masses of 76 µg and 80 µg and IAEA-C8 with a consensus value of F<sup>14</sup>C = 0.1503 ± 0.0017 and sample masses of 63 µg and 100 µg. All standards including OXII and <sup>14</sup>C-free material used for data correction and IAEA-C7 and IAEA-C8 for quality control of AMS measurements are measured on the same day as the samples. F<sup>14</sup>C values of secondary standards undergo the same data correction as the samples. Results of IAEA-C7 and C8 agree within uncertainties (Table S2).

$F^{14}C$  of carbon from fossil sources is 0, and carbon from non-fossil sources (or “contemporary” sources) should have  $F^{14}C$  of 1. But the extensive release of  $^{14}C$  from nuclear bomb tests in the late 1950s and early 1960s and  $^{14}C$ -free  $CO_2$  from fossil fuel combustion has perturbed the atmospheric  $F^{14}C$  values significantly. The former increased the  $F^{14}C$  in the atmosphere by up to a factor of 2 in the northern hemisphere in the 1960s. The nuclear tests have been banned in the atmosphere, outer space and under water since 1963. Since then, the atmospheric  $F^{14}C$  has been slowly decreasing, as  $^{14}C$  is mainly taken up by the oceans and terrestrial biosphere and diluted by  $^{14}C$ -free  $CO_2$  (Hua and Barbetti, 2004; Levin et al., 2010). [Currently In 2010](#), the  $F^{14}C$  of the atmospheric  $CO_2$  is approximately 1.04 (Levin et al., 2008, [2010](#)), [whereas in 2014 it decreased to 1.02 \(Vlachou et al., 2018\)](#).

## 2.5 Estimation of source contributions to different carbon fractions

$F^{14}C$  of EC, OC and WIOC (i.e.,  $F^{14}C_{(EC)}$ ,  $F^{14}C_{(OC)}$  and  $F^{14}C_{(WIOC)}$ , respectively) are directly measured. Mass concentrations ( $M_{WSOC}$ ) and  $F^{14}C$  of WSOC ( $F^{14}C_{(WSOC)}$ ) can be calculated as

$$M_{WSOC} = M_{OC} - M_{WIOC} \quad (3)$$

$$F^{14}C_{(WSOC)} = \frac{F^{14}C_{(OC)} \times M_{OC} - F^{14}C_{(WIOC)} \times M_{WIOC}}{M_{OC} - M_{WIOC}}. \quad (4)$$

where  $M_{OC}$  and  $M_{WIOC}$  are mass concentrations of OC and WIOC, respectively.  $M_{OC}$  is measured by the thermal-optical method as described in Sect. 2.2.

To estimate  $M_{WIOC}$ , we assume two extreme cases following the method of Dusek et al. (2017). (1) WIOC is completely recovered. That is, the recovery of WIOC is 100%, where the recovery is estimated by dividing the WIOC mass extracted using ACS ( $M_{WIOC,e}$ ) with the WIOC mass in the aerosol samples. But the WIOC combustion temperature of 375 °C in the ACS is highly likely not high enough to recover 100 % of WIOC. Thus, this estimation is an underestimate of  $M_{WIOC}$  ( $M1_{WIOC}$ ). (2) We assume that WIOC has the same recovery as OC. The  $M_{WIOC}$  can be calculated by dividing  $M_{WIOC,e}$  by the OC recovery. Due to the fact that usually less WIOC than OC is lost to charring, this probably is an overestimate of  $M_{WIOC}$  ( $M2_{WIOC}$ ).  $M_{WIOC}$  is assumed to vary from  $M1_{WIOC}$  to  $M2_{WIOC}$ . The most likely value of  $M_{WIOC}$  is chosen at  $M1_{WIOC} + 2/3 \times (M2_{WIOC} - M1_{WIOC})$ , because it is more likely that WIOC has a similar recovery as OC rather than 100 % recovery. Once  $M_{WIOC}$  is estimated, the  $F^{14}C_{(WSOC)}$  can be calculated following the Eq. (4). The best estimate and ranges of  $F^{14}C_{(WSOC)}$  is presented in Fig. S2 and Table S1. [F<sup>14</sup>C<sub>\(WSOC\)</sub> is only slightly sensitive to M<sub>WIOC</sub>. If we shift the M<sub>WIOC</sub> from M1<sub>WIOC</sub> to M2<sub>WIOC</sub>, the average values of F<sup>14</sup>C<sub>\(WSOC\)</sub> only change by less than 0.03 \(absolute differences\)](#).

$F^{14}C_{(EC)}$  can be converted to the relative contribution of biomass burning to EC ( $f_{bb}(EC)$ ) by dividing with  $F^{14}C$  of biomass burning ( $F^{14}C_{bb} = 1.10 \pm 0.05$ ; (Lewis et al., 2004; Mohn et al., 2008; Palstra and Meijer, 2014), to eliminate the effect from nuclear bomb tests in the 1960s. [F<sup>14</sup>C<sub>bb</sub> represents F<sup>14</sup>C of biomass burning including wood burning and crop residue](#)

burning. This is because that biomass burning in Xi'an mainly includes household usage of wood and crop residues as well as open burning of crop residues.  $F^{14}C$  for burning of annual crop has a similar value of current atmospheric  $CO_2$ .  $F^{14}C$  of wood burning is higher than that and varies with the age of tree. Estimates of  $F^{14}C$  for wood burning are based on tree-growth models (e.g., Lewis et al., 2004; Mohn et al., 2008) and found to range from 1.08 to 1.30 relating to wood age and fell date (Heal, 2014, and references therein). The lower limit of  $F^{14}C_{bb}$  corresponds to burning of young wood (5–10 years old tree harvested between 2010 and 2015) and crop residues as main sources of EC, and the upper end of  $F^{14}C_{bb}$  corresponds to older wood (30–60 years old tree) combustion as the main source of EC.

Analogously, the relative contribution of non-fossil sources to OC, WIOC and WSOC (i.e.,  $f_{nf}(OC)$ ,  $f_{nf}(WIOC)$  and  $f_{nf}(WSOC)$ , respectively) can be estimated from their corresponding  $F^{14}C$  values and  $F^{14}C_{nf}$ .  $F^{14}C_{nf}$  is  $F^{14}C$  of non-fossil sources include both biomass burning and biogenic emissions.  $F^{14}C$  of biogenic sources can be estimated from long-term  $^{14}CO_2$  measurements at the Schauinsland background station (Levin and Hammer, 2013; Levin et al., 2010). In Xi'an, biogenic OC is probably not very important, as could be expected from high concentrations of carbonaceous aerosols and strong anthropogenic sources. ( $F^{14}C_{nf}$  is thus estimated as  $1.09 \pm 0.05$ ; (Lewis et al., 2004; Levin et al., 2010; Y. L. Zhang et al., 2014;). The central value of 1.09 corresponds to 15% contribution of biogenic OC to OC. The lower limit of  $F^{14}C_{nf}$  corresponds to current biospheric sources as the source of OC (1.04), and the upper limit corresponds to wood combustion as the main source of OC, with only minor contribution from annual crops.

EC is primarily produced from biomass burning ( $EC_{bb}$ ) and fossil fuel combustion ( $EC_{fossil}$ ), and absolute EC concentrations from each source can be estimated as:

$$EC_{bb} = M_{EC} \times f_{bb}(EC) \quad (5)$$

$$EC_{fossil} = M_{EC} \times (1 - f_{bb}(EC)) = M_{EC} \times f_{fossil}(EC) \quad (6)$$

where  $f_{fossil}(EC)$  is the relative contribution of fossil sources to EC,  $M_{EC}$  are mass concentrations of EC. Analogously, mass concentrations of OC, WIOC and WSOC from non-fossil sources ( $OC_{nf}$ ,  $WIOC_{nf}$  and  $WSOC_{nf}$ , respectively) and fossil sources ( $OC_{fossil}$ ,  $WIOC_{fossil}$  and  $WSOC_{fossil}$ , respectively) can be determined.

More detailed source apportionment of OC can be achieved by combining  $^{14}C$ -apportioned OC and EC with characteristic primary OC/EC ratios for each source (i.e., using EC as a tracer of primary emissions; EC tracer method). Biomass burning usually has higher primary OC/EC ratios ( $r_{bb} = 3-10$ ) than those for coal combustion ( $r_{coal} = 1.6-3$ ) and vehicle exhausts ( $r_{vehicle} = 0.5-1.3$ ) (Ni et al. (2017) and references therein). Best estimate of  $r_{bb}$  ( $4 \pm 1$ ; average  $\pm$  SD),  $r_{coal}$  ( $2.38 \pm 0.44$ ), and  $r_{vehicle}$  ( $0.85 \pm 0.16$ ) is done through a literature search as described in Ni et al. (2018) and comparable to values used in ealier  $^{14}C$  source apportionment in China (Y. L. Zhang et al., 2014, 2015a).

Primary biomass burning OC ( $POC_{bb}$ ) can be estimated by multiplying  $EC_{bb}$  with  $r_{bb}$ :

$$\text{POC}_{\text{bb}} = \text{EC}_{\text{bb}} \times r_{\text{bb}} \quad (7)$$

Other non-fossil OC excluding  $\text{POC}_{\text{bb}}$  ( $\text{OC}_{\text{o,nf}}$ ) can be estimated as:

$$\text{OC}_{\text{o,nf}} = \text{OC}_{\text{nf}} - \text{POC}_{\text{bb}} \quad (8)$$

where  $\text{OC}_{\text{o,nf}}$  includes OC from all non-fossil sources other than primary biomass burning, thus mainly consists of secondary OC from biomass burning ( $\text{SOC}_{\text{bb}}$ ), primary and secondary biogenic OC, as well as cooking emissions. In most cases, contributions of primary biogenic OC to  $\text{PM}_{2.5}$  are likely small ([Gelencsér et al., 2007](#); [Guo et al., 2012](#)).

$\text{OC}_{\text{fossil}}$  includes both primary and secondary OC from fossil sources ( $\text{POC}_{\text{fossil}}$  and  $\text{SOC}_{\text{fossil}}$ , respectively):

$$\text{OC}_{\text{fossil}} = \text{POC}_{\text{fossil}} + \text{SOC}_{\text{fossil}}, \quad (9)$$

where  $\text{POC}_{\text{fossil}}$  can be estimated from  $\text{EC}_{\text{fossil}}$  and primary OC/EC ratio of fossil fuel combustion ( $r_{\text{fossil}}$ ):

$$\text{POC}_{\text{fossil}} = \text{EC}_{\text{fossil}} \times r_{\text{fossil}}. \quad (10)$$

Fossil sources in China are almost exclusively from coal combustion and vehicle emissions, thus  $r_{\text{fossil}}$  can be estimated as

$$r_{\text{fossil}} = r_{\text{coal}} \times p + r_{\text{vehicle}} \times (1 - p), \quad (11)$$

where  $p$  is the relative contribution of coal combustion to fossil EC. That is,  $p = \text{EC}_{\text{coal}}/\text{EC}_{\text{fossil}}$ , where estimation of  $\text{EC}_{\text{coal}}$  is achieved by combining  $\text{F}^{14}\text{C}_{(\text{EC})}$  and  $\delta^{13}\text{C}_{\text{EC}}$  with the Bayesian calculations as described in details in the Sect. 2.6 and Supplement S4S2.

To propagate uncertainties, a Monte Carlo simulation with 10000 individual calculations was conducted. For each individual calculation,  $\text{F}^{14}\text{C}_{(\text{EC})}$ ,  $\text{F}^{14}\text{C}_{(\text{OC})}$ ,  $\text{F}^{14}\text{C}_{(\text{WIOC})}$  and concentrations of EC, OC and WIOC are randomly chosen from a normal distribution symmetric around the measured values with the experimental uncertainties as standard deviation (SD). For  $\text{F}^{14}\text{C}_{\text{bb}}$ ,  $\text{F}^{14}\text{C}_{\text{nf}}$ ,  $r_{\text{bb}}$ ,  $r_{\text{coal}}$  and  $r_{\text{vehicle}}$  random values are chosen from a triangular frequency distribution with its maximum at the central value and is 0 at the lower limit and upper limit. For  $p$  values, random values from the respective [probability density function](#) (PDF) of  $p$  were used (Supplement S1). In this way 10000 random sets of variables can be generated. For  $f_{\text{bb}}(\text{EC})$ ,  $f_{\text{nf}}(\text{OC})$ ,  $f_{\text{nf}}(\text{WIOC})$ ,  $f_{\text{nf}}(\text{WSOC})$ ,  $\text{EC}_{\text{bb}}$ ,  $\text{EC}_{\text{fossil}}$ ,  $\text{OC}_{\text{nf}}$ ,  $\text{OC}_{\text{fossil}}$ ,  $\text{WIOC}_{\text{nf}}$ ,  $\text{WIOC}_{\text{fossil}}$ ,  $\text{WSOC}_{\text{nf}}$ ,  $\text{WSOC}_{\text{fossil}}$ ,  $\text{POC}_{\text{bb}}$  and  $\text{OC}_{\text{o,nf}}$ , the derived average represents the best estimate, and the SD represents the combined uncertainties (Tables S3S1, S4). For  $\text{POC}_{\text{fossil}}$  and  $\text{SOC}_{\text{fossil}}$ , the median value is considered as the best estimates and the interquartile range (25th–75th percentile) are used as uncertainties, because the PDFs of  $\text{POC}_{\text{fossil}}$  and  $\text{SOC}_{\text{fossil}}$  are asymmetric (Fig. S3b, Table S5S4).

## 2.6 Source apportionment of EC using Bayesian statistics

Using  $\text{F}^{14}\text{C}$  and  $\delta^{13}\text{C}$  signatures of EC ( $\text{F}^{14}\text{C}_{(\text{EC})}$ ,  $\delta^{13}\text{C}_{\text{EC}}$ ) and assuming isotope mass balance in combination with a Bayesian Markov chain Monte Carlo (MCMC) scheme, it is possible to differentiate the 3 main sources of EC: biomass burning,



liquid fossil fuel combustion (i.e., vehicle emissions) and coal combustion (Andersson et al., 2015; Li et al., 2016; Winiger et al., 2016; Fang et al., 2018). [EC from fossil sources can be first separated from biomass burning by  \$F^{14}C\_{\(EC\)}\$ . Further,  \$\delta^{13}C\_{EC}\$  allows separation of fossil sources into coal and liquid fossil fuel burning:](#)

$$\begin{pmatrix} F^{14}C_{(EC)} \\ \delta^{13}C_{EC} \\ 1 \end{pmatrix} = \begin{pmatrix} F^{14}C_{bb} & F^{14}C_{liq.fossil} & F^{14}C_{coal} \\ \delta^{13}C_{bb} & \delta^{13}C_{liq.fossil} & \delta^{13}C_{coal} \\ 1 & 1 & 1 \end{pmatrix} \begin{pmatrix} f_{bb} \\ f_{liq.fossil} \\ f_{coal} \end{pmatrix} \quad (12)$$

5 where the last row ensures the mass balance;  $f_{bb}$ ,  $f_{liq.fossil}$  and  $f_{coal}$  are the relative contribution from biomass burning, liquid fossil fuel combustion and coal combustion to EC, respectively;  $F^{14}C_{bb}$  is the  $F^{14}C$  of biomass burning ( $1.10 \pm 0.05$ ), as mentioned in Sect. 2.5.  $F^{14}C_{liq.fossil}$  and  $F^{14}C_{coal}$  are zero due to the long-time decay.  $\delta^{13}C_{bb}$ ,  $\delta^{13}C_{liq.fossil}$  and  $\delta^{13}C_{coal}$  are the  $\delta^{13}C$  signature of EC emitted from biomass burning, liquid fossil fuel combustion and coal combustion, respectively. The means and the standard deviations for  $\delta^{13}C_{bb}$  ( $-26.7 \pm 1.8$  ‰ for C3 plants, and  $-16.4 \pm 1.4$  ‰ for corn stalk),  $\delta^{13}C_{liq.fossil}$  ( $-25.5 \pm$   
10  $1.3$  ‰), and  $\delta^{13}C_{coal}$  ( $-23.4 \pm 1.3$  ‰) are compiled and established by literature studies in previous publications (Andersson et al. (2015) and references therein; Ni et al., 2018). [The source endmembers for  \$\delta^{13}C\$  are less well-constrained than for  \$F^{14}C\$ , as  \$\delta^{13}C\$  varies with fuel types and burning conditions. For example, the range of possible  \$\delta^{13}C\_{liq.fossil}\$  overlaps to a small extent with the range of  \$\delta^{13}C\_{coal}\$ , although liquid fossil fuels are usually more depleted than coal.](#) The MCMC technique takes into account the variability in the source signatures of  $F^{14}C$  and  $\delta^{13}C$  (Parnell et al., 2010, 2013), where  $\delta^{13}C$  introduces  
15 a larger uncertainty than  $F^{14}C$  ~~as  $\delta^{13}C$  varies with fuel types and combustion conditions.~~ [Uncertainties of  \$\delta^{13}C\_{bb}\$ ,  \$\delta^{13}C\_{liq.fossil}\$ ,  \$\delta^{13}C\_{coal}\$  and  \$F^{14}C\_{bb}\$  as well as the measured ambient  \$\delta^{13}C\_{EC}\$  and  \$F^{14}C\_{\(EC\)}\$  are propagated.](#) The results of the MCMC calculations are the posterior [probability density functions \(PDFs\)](#) for  $f_{bb}$ ,  $f_{liq.fossil}$  and  $f_{coal}$  (Fig. S4). [The PDFs of  \$f\_{liq.fossil}\$  and  \$f\_{coal}\$  are skewed. By contrast, the PDFs of  \$f\_{bb}\$  is symmetric as it is well-constrained by  \$F^{14}C\$  \(Fig. 6\). In this study, the median was used to represent the best estimate of the  \$f\_{bb}\$ ,  \$f\_{liq.fossil}\$  and  \$f\_{coal}\$ .](#) Uncertainties of this best estimate are expressed  
20 as an interquartile range (25th-75th percentile) of the corresponding PDFs. The MCMC-derived  $f_{bb}$  (calculated by Eq. 12) is very similar to that obtained [directly](#) from radiocarbon data ( $f_{bb}(EC)$ , Eq. 5) as both of them are well constrained by  $F^{14}C$ . In this study,  $f_{bb}$  and  $f_{bb}(EC)$  are therefore used interchangeably. Details on the MCMC-driven Bayesian approach have been described in our earlier study (Ni et al., 2018).

### 3 Results

#### 25 3.1 $^{14}C$ -based source apportionment of EC and OC

EC is derived mainly from fossil sources, regardless of differences in EC concentrations and seasonal variations. The relative contribution of fossil fuel combustion to EC ( $f_{fossil}(EC)$ ) ranges from 69% to 89%, with an annual average of  $82 \pm 6\%$  (Fig. 1a). The relative contribution of fossil sources to OC ( $f_{fossil}(OC)$ ) is consistently smaller than  $f_{fossil}(EC)$  (Fig. 1b). The values of  $f_{fossil}(OC)$  range from 41% to 51%, with an annual average of  $47 \pm 4\%$ . The absolute difference in the fossil fractions

between OC and EC is on average 35% (28%–42%; range). The main reason for this difference is that biomass burning emits more OC relative to EC compared to the fossil sources (Streets et al., 2003; Akagi et al., 2011; Zhou et al., 2017). Thus, even if biomass burning contributes a small fraction to EC, it will have a much higher contribution to primary OC. Additionally other non-fossil sources, such as secondary biomass burning emissions, primary and secondary biogenic emissions as well as cooking contribute to OC, but not to EC.

The annual average  $f_{\text{fossil}}(\text{EC})$  and  $f_{\text{fossil}}(\text{OC})$  reported here is consistent with the results reported at an urban site of the same Chinese city in 2008/2009 ( $f_{\text{fossil}}(\text{EC}) = 83 \pm 5\%$ ,  $f_{\text{fossil}}(\text{OC}) = 46 \pm 8\%$ ; Ni et al., 2018), an urban site of Beijing, China in 2013/2014 ( $f_{\text{fossil}}(\text{EC}) = 82 \pm 7\%$ ,  $f_{\text{fossil}}(\text{OC}) = 48 \pm 12\%$ ; Zhang et al., 2017) and 2010/2011 ( $f_{\text{fossil}}(\text{EC}) = 79 \pm 6\%$ ; Zhang et al., 2015b) and a background receptor site of Ningbo, China ( $f_{\text{fossil}}(\text{EC}) = 77 \pm 15\%$ ; Liu et al., 2013). Much lower  $f_{\text{fossil}}(\text{EC})$  and  $f_{\text{fossil}}(\text{OC})$  was found at a regional background site in South China in 2005/2006 ( $f_{\text{fossil}}(\text{EC}) = 38 \pm 11\%$  and  $f_{\text{fossil}}(\text{OC}) = 19 \pm 10\%$  for Hainan; Y. L. Zhang et al., 2014), regional receptor sites in South Asia in 2008/2009 ( $f_{\text{fossil}}(\text{EC}) = 27 \pm 6\%$  and  $f_{\text{fossil}}(\text{OC}) = 31 \pm 5\%$  for Hanimaadhoo, Maldives and  $f_{\text{fossil}}(\text{EC}) = 41 \pm 5\%$  and  $f_{\text{fossil}}(\text{OC}) = 36 \pm 5\%$  for Sinhad, India; Sheesley et al., 2012), where regional/local biomass burning contributes much more to carbonaceous aerosols than fossil fuel combustion and the  $^{14}\text{C}$  levels can change significantly with the origin of air masses.

The  $f_{\text{fossil}}(\text{EC})$  and  $f_{\text{fossil}}(\text{OC})$  follow the same seasonal trends: the values are lower in winter and higher in the rest of the seasons (i.e., warm period). ~~In~~ Within the warm period, ~~there is a slight but consistent tendency to be both~~ are slightly higher in spring ( $f_{\text{fossil}}(\text{EC}) = 86 \pm 3\%$ ,  $f_{\text{fossil}}(\text{OC}) = 50 \pm 1\%$ ) than in summer and autumn ( $f_{\text{fossil}}(\text{EC}) = 84 \pm 2\%$ ,  $f_{\text{fossil}}(\text{OC}) = 47 \pm 3\%$ ) in general and also to be slightly lower under the cleanest periods (i.e., in spring, summer and autumn,  $f_{\text{fossil}}(\text{EC})$  and  $f_{\text{fossil}}(\text{OC})$  in polluted days (“H” and “M” samples) were higher than in clean days (“L” samples); Fig. 1, Tables S31, S65). The low  $f_{\text{fossil}}(\text{EC})$  in winter is due to the substantially increased contribution from biomass burning (mainly wood burning) for heating in winter, which gradually stops in spring but in summer and early autumn, open biomass burning (mainly crop residues) occurs in Xi’an and its surrounding areas. Some biomass burning for cooking is probably present all year round (Huang et al., 2012; T. Zhang et al., 2014). The seasonality in biomass burning activity is consistent with the variations of  $f_{\text{bb}}(\text{EC})$ ;  $f_{\text{bb}}(\text{EC})$  which is higher in winter ( $28 \pm 4\%$ ) and lower than that in other seasons (i.e., warm period, on average around  $15 \pm 2\%$ ), with a slightly lower values in spring ( $14 \pm 3\%$ ). This is in line with our previous study in Xi’an, China in 2008/2009 (Ni et al., 2018). By comparison with literature data for Beijing, Beijing shows a very different seasonal trend, where  $f_{\text{bb}}(\text{EC})$  was lowest in summer ( $\sim 7\%$ ) and increased to  $\sim 20\%$  during the rest of the year (Zhang et al., 2017). The distinct different values and seasonality of  $f_{\text{bb}}(\text{EC})$  in Xi’an and Beijing indicate that biomass burning emissions are seasonally dependent and their influences vary spatially in different Chinese cities. The seasonal trends of  $f_{\text{fossil}}(\text{OC})$  were different in Beijing as well, with higher  $f_{\text{fossil}}(\text{OC})$  in winter than in other seasons (Yan et al., 2017; Zhang et al., 2017). This is in line with previous source apportionment results that during wintertime biomass burning is a major source of OC in Xi’an and coal combustion is a dominant source for OC in Beijing (R. J. Huang et al., 2014; Elser et al., 2016).

EC concentrations from fossil fuel combustion ( $EC_{\text{fossil}}$ ) span a range from ~~around~~ about 0.6 to 7  $\mu\text{g m}^{-3}$  and increase by roughly a factor of 3 from summer to winter when separately comparing clean and polluted periods. The remaining EC is contributed by biomass burning ( $EC_{\text{bb}}$ ), which varies in a wider range than  $EC_{\text{fossil}}$  from ~~about~~ around 0.1 to 3  $\mu\text{g m}^{-3}$  (Fig. 1a, Table [S4S3](#)).  $EC_{\text{fossil}}$  values are on average 2–3 times higher than  $EC_{\text{bb}}$  in winter and 5–8 times higher in other seasons. This implies that the winter-summer differences in biomass burning emissions is larger than fossil fuel combustion emissions, regardless of the fact that both biomass burning and coal combustion are expected to increase during wintertime for heating (T. Zhang et al., 2014; Shen et al., 2017; Zhu et al., 2017). OC concentrations from fossil fuel combustion ( $OC_{\text{fossil}}$ ) range from ~~around~~ about 1 to 20  $\mu\text{g m}^{-3}$ , with an ~~annual~~ average of  $6.8 \pm 6.0$   $\mu\text{g m}^{-3}$ , which is comparable to non-fossil OC concentrations (range: 2–28  $\mu\text{g m}^{-3}$ ; mean:  $8.2 \pm 8.2$   $\mu\text{g m}^{-3}$ ). Clear seasonal variations were observed in both EC and OC from fossil and non-fossil sources, with maxima in winter and minima in summer (Table [S7S6](#)). This is mainly because of an increase in coal burning and biomass burning for heating as well as unfavorable meteorological conditions in winter.

### 3.2 $^{14}\text{C}$ - based source apportionment of water-soluble and water-insoluble OC

The fossil contribution to total WIOC ( $f_{\text{fossil}}(\text{WIOC})$ ) varied from  $49 \pm 1\%$  in winter to  $60 \pm 5\%$  in summer, with an annual average of  $55 \pm 5\%$ . In winter the enhanced biomass burning is a source of non-fossil WIOC (Dusek et al., 2017). The relative contributions of fossil sources to WSOC ( $f_{\text{fossil}}(\text{WSOC}) = 42 \pm 6\%$ ) were smaller than that to WIOC for nearly all the samples throughout the year. In winter both primary emission and secondary formation from biomass burning contribute to WSOC and in the warm period additionally biogenic SOC, though the latter concentrations are probably relatively low. In addition, primary fossil emissions are expected to contribute very little to WSOC, so the lower fossil fractions in WSOC are in line with expectations. In this study, the largest differences between fossil fractions in WIOC and WSOC were found to be 36% for sample Summer-L (e.g., low TC concentrations in summer). Summer-L had the lowest  $f_{\text{fossil}}(\text{WSOC})$  of  $28 \pm 2\%$  (Fig. 2a), which was contrary to the stable  $f_{\text{fossil}}(\text{EC})$  in the warm period (Fig. 1a) and therefore cannot be explained by an increase in primary (or probably secondary) biomass burning OC. This indicates that the lowest  $f_{\text{fossil}}(\text{WSOC})$  for Summer-L was probably due to the impact of biogenic OC in the clean period.

~~As shown in Fig. 2a,~~ WSOC concentrations from non-fossil sources ( $\text{WSOC}_{\text{nf}}$ ) are larger than WSOC from fossil sources ( $\text{WSOC}_{\text{fossil}}$ ) at 95% confidence level (paired  $t$ -test,  $P$ -value=0.016), with an ~~annual~~ average of  $5.1 \pm 4.9$   $\mu\text{g m}^{-3}$  (range of  $1.5$ – $16.7$   $\mu\text{g m}^{-3}$ ) for  $\text{WSOC}_{\text{nf}}$  versus an average of  $3.6 \pm 3.0$   $\mu\text{g m}^{-3}$  (range of  $0.6$ – $9.4$   $\mu\text{g m}^{-3}$ ) for  $\text{WSOC}_{\text{fossil}}$  (Fig. 2). WIOC concentrations from non-fossil sources ( $\text{WIOC}_{\text{nf}}$ ) ~~are comparable with those do not differ significantly~~ from fossil sources ( $\text{WIOC}_{\text{fossil}}$ ) (paired  $t$ -test,  $P$ -value=0.113).  $\text{WSOC}_{\text{nf}}$ ,  $\text{WSOC}_{\text{fossil}}$ ,  $\text{WIOC}_{\text{nf}}$  and  $\text{WIOC}_{\text{fossil}}$  show the same seasonal trends, with higher mass concentrations in winter and lower in the warm period.  $\text{WSOC}_{\text{nf}}$  is responsible for  $\sim 35\%$  of the increased OC mass in winter, followed by  $\text{WIOC}_{\text{nf}}$  ( $\sim 24\%$ ),  $\text{WIOC}_{\text{fossil}}$  ( $\sim 22\%$ ) and  $\text{WSOC}_{\text{ff}}$  ( $\sim 19\%$ ).

Figure 2b shows the fraction of  $\text{WIOC}_{\text{nf}}$ ,  $\text{WSOC}_{\text{nf}}$ ,  $\text{WIOC}_{\text{fossil}}$  and  $\text{WSOC}_{\text{fossil}}$  in the total OC in different seasons. WSOC (the sum of the blue areas) on yearly average accounted for  $60 \pm 5\%$  of OC (ranging from 53–70%), consistent with previous measurements in Xi'an (Cheng et al., 2013; Zhang et al., 2018; Zhao et al., 2018). The remaining  $40 \pm 5\%$  of OC is WIOC (the sum of red areas). Throughout the year,  $\text{WSOC}_{\text{nf}}$  was the largest contributor to OC, which accounts for about one-third of the total OC, probably resulting from the mostly water-soluble biomass-burning POC and SOC as well as biogenic SOC (e.g., Mayol-Bracero et al., 2002; Nozière et al., 2015; Dusek et al., 2017). The respective proportions of  $\text{WSOC}_{\text{fossil}}$ ,  $\text{WIOC}_{\text{fossil}}$  and  $\text{WIOC}_{\text{nf}}$  in OC were 26 %, 21% and 17% on a yearly average in descending order, very likely related to secondary fossil OC, primary fossil OC and primary biomass burning, respectively (Weber et al., 2007; Dai et al., 2015; Dusek et al., 2017; Yan et al., 2017).

10 The majority (60–76%) of the non-fossil OC was water-soluble. This result is qualitatively consistent with findings reported for an urban site of Xi'an (Zhang et al., 2018) and other places such as at an urban site of Beijing, China (Zhang et al., 2018), an urban or rural site in Switzerland (Zhang et al., 2013), a remote site on Hainan Island, southern China (Y. L. Zhang et al., 2014) and two rural sites in the eastern United States (Wozniak et al., 2012) and a regional background site in the Netherlands (Dusek et al., 2017). Seasonal variations of  $(\text{WSOC}/\text{OC})_{\text{nf}}$  ratios were also observed, with lower ratios in winter (around 0.6) and higher ratios in summer and spring (around 0.7). This reflects the higher fraction of  $\text{WIOC}_{\text{nf}}$  in  $\text{OC}_{\text{nf}}$  during wintertime, resulting from primary biomass burning emissions (Dusek et al., 2017). In summer and spring, concentrations of  $\text{WSOC}_{\text{nf}}$  and  $\text{OC}_{\text{nf}}$  are both small and the contribution of biogenic SOC to  $\text{WSOC}_{\text{nf}}$  can be noticeable (Dusek et al., 2017).

The fossil OC is less water soluble in winter with somewhat lower  $(\text{WSOC}/\text{OC})_{\text{fossil}}$  ratios ~~of around 0.5~~ than in the rest of seasons (i.e., warm period (Fig. 3)).  $(\text{WSOC}/\text{OC})_{\text{fossil}}$  ratios in winter ( $0.50 \pm 0.03$ , with a range of 0.48–0.53) fall into the lower end of the range of  $(\text{WSOC}/\text{OC})_{\text{fossil}}$  ratios in warm period ( $0.57 \pm 0.08$ , with a range of 0.42–0.70; Fig. 3).  $\text{WSOC}_{\text{fossil}}$  can come mainly from secondary formation and/or photochemical aging of primary organic aerosols, thus the higher  $(\text{WSOC}/\text{OC})_{\text{fossil}}$  ratios in the warm period suggest an enhanced SOC formation from fossil VOCs from vehicle emissions and/or coal burning. In spring and summer there is a clear increasing trend of  $(\text{WSOC}/\text{OC})_{\text{fossil}}$  in more polluted periods. Elevated  $(\text{WSOC}/\text{OC})_{\text{fossil}}$  ratios in polluted periods are very likely related to the formation of high pollutant concentrations in spring and summer. More stagnant conditions in the polluted periods (indicated by lower wind speed, see Fig. 3) that allow for accumulation of pollutants also provide more time for photochemical processes and SOC formation. As a consequence, formation of fossil WSOC will increase in stagnant conditions. At the same time,  $(\text{WIOC}/\text{OC})_{\text{fossil}}$  ratios decline when pollution gets worse, suggesting removal of WIOC, likely through photochemical reactions. This can shift the water-soluble vs. water-insoluble distribution for fossil OC to WSOC (Szidat et al., 2009). As a consequence, the  $(\text{WSOC}/\text{OC})_{\text{fossil}}$  ratio is higher for Summer-H (70.62%) than for Summer-L (52.42%).

### 3.3 Combustion sources apportioned by stable carbon isotopes

Along with radiocarbon data, the stable carbon isotopic ratio of EC (denoted by  $\delta^{13}\text{C}_{\text{EC}}$ ) provides additional insight into source apportionment of EC, especially between different type of fossil sources (i.e., coal versus liquid fossil fuel combustion). Figure 4 shows  $^{14}\text{C}$ -based  $f_{\text{fossil}}(\text{EC})$  against  $\delta^{13}\text{C}_{\text{EC}}$  in Xi'an in different seasons for 2015/2016 from this study and in winter for 2008/2009 from Ni et al. (2018), together with the ranges of endmembers (i.e., isotopic signature) for the different EC sources of coal combustion, liquid fossil fuel combustion and biomass burning (C3 and C4 plants).  $f_{\text{fossil}}(\text{EC})$  is well constrained [by  \$F^{14}\text{C}\_{\text{EC}}\$](#) , clearly separating fossil sources from biomass burning. In contrast to  $^{14}\text{C}$ , the source endmembers (i.e., isotopic signature) for  $\delta^{13}\text{C}$  are less well constrained and  $\delta^{13}\text{C}$  values for liquid fossil fuel combustion overlap with  $\delta^{13}\text{C}$  values for both coal and C3 plant combustion. Regardless of the changes of  $\delta^{13}\text{C}_{\text{EC}}$  in different seasons, all the  $\delta^{13}\text{C}_{\text{EC}}$  data points fall within the range of burning C3 plant, coal and liquid fossil fuel, indicating that C3 plant is the dominating biomass type in Xi'an with little influence from C4 plant burning. In Xi'an, the dominant C4 plant is corn stalk, which is burned for cooking and heating in the areas surrounding Xi'an (Sun et al., 2017; Zhu et al., 2017).

The annually averaged  $\delta^{13}\text{C}_{\text{EC}}$  is  $-24.9 \pm 0.4 \text{ ‰}$  ( $\pm$  SD). Moderate seasonal variation of  $\delta^{13}\text{C}_{\text{EC}}$  was observed, reflecting a moderate shift in the relative contributions from combustion sources throughout the year. The  $\delta^{13}\text{C}_{\text{EC}}$  in autumn ( $-25.3 \pm 0.2 \text{ ‰}$ ) and summer ( $-25.0 \pm 0.3 \text{ ‰}$ ) are most depleted and fall into the overlapped  $\delta^{13}\text{C}$  range for liquid fossil fuel combustion and C3 plant burning. Because the  $^{14}\text{C}$  values in autumn and summer indicate that biomass burning contribution to EC is relatively low ( $\sim 16\%$ ), we can expect that liquid fossil fuel combustion dominates EC in autumn and summer.  $\delta^{13}\text{C}_{\text{EC}}$  signatures in winter ( $-24.8 \pm 0.2 \text{ ‰}$ ) scatter into the range for C3 plant, liquid fossil fuel and coal combustion, implying that EC is influenced by mixed sources. The  $\delta^{13}\text{C}_{\text{EC}}$  signatures in spring ( $-24.6 \pm 0.3 \text{ ‰}$ ) overlaps with both liquid fossil fuel combustion and coal combustion. Only the sample Spring-L is characterized by the most enriched  $\delta^{13}\text{C}_{\text{EC}}$  value among all the samples, even more enriched than wintertime  $\delta^{13}\text{C}_{\text{EC}}$ , when coal combustion for heating is expected to influence EC strongly. At the same time, higher contributions from biomass burning (i.e., lower  $f_{\text{fossil}}(\text{EC})$ ) were observed for Spring-L. This suggests contributions from a  $^{13}\text{C}$ -enriched biomass burning, that is, corn stalk burning (C4 plant). The contribution of this regional source can become noticeable in the relatively clean air that characterizes Spring-L.

To estimate seasonal source contributions to EC, we combined all the data points from each season for the Bayesian Markov chain Monte Carlo techniques (MCMC) calculations. The MCMC results (Figs. 5a, 6 Fig. S4, Table S8) show that the dominant EC source is liquid fossil fuel combustion (i.e., vehicle emissions). Liquid fossil fuel combustion accounts for 64 % (median; 45–74%, interquartile range) of EC in autumn, 60% (41–72%) in summer, 53% (33–69%) in spring, and 46% (29–59%) in winter, respectively, in descending order. Biomass burning EC is a small fraction of total EC throughout the year. However, the relative contribution of biomass burning to EC increased in winter (28 %; 26–31%), and is comparable to the relative contribution of coal combustion (25%; 13–41%). In the warm period, coal combustion for cooking accounts for a larger fraction of EC than biomass burning. [The interquartile ranges for  \$f\_{\text{liq.fossil}}\$  overlap with those for  \$f\_{\text{coal}}\$  in winter and](#)

spring (Table S7). However, comparing the PDFs distribution for both cases give a more complete picture. As shown in Fig. 6, there is fair amount of overlap between the PDFs distributions of  $f_{\text{liq.fossil}}$  and  $f_{\text{coal}}$ . Though with some overlaps, in all seasons, the distribution of  $f_{\text{liq.fossil}}$  are skewed to the left, while  $f_{\text{coal}}$  is skewed to the right, with considerably higher median  $f_{\text{liq.fossil}}$  than median  $f_{\text{coal}}$ .

5 EC concentrations from biomass burning ( $\text{EC}_{\text{bb}}$ ) increased by 9 times from summer (seasonal average of  $0.2 \mu\text{g m}^{-3}$ ) to winter ( $1.8 \mu\text{g m}^{-3}$ ; Fig. 5b, Table S9S8). EC from coal combustion ( $\text{EC}_{\text{coal}}$ ) has a 5-fold increase from ~~around-about~~  $0.3 \mu\text{g m}^{-3}$  in summer and autumn to  $1.6 \mu\text{g m}^{-3}$  in winter. EC from liquid fossil fuel ( $\text{EC}_{\text{liq.fossil}}$ ) varies less strongly than  $\text{EC}_{\text{bb}}$  and  $\text{EC}_{\text{coal}}$ , by 4-times from  $0.7 \mu\text{g m}^{-3}$  in summer and  $2.9 \mu\text{g m}^{-3}$  in winter. Liquid fossil fuel combustion (i.e., vehicle emissions) should be roughly constant throughout the year. The increased concentrations of  $\text{EC}_{\text{liq.fossil}}$  in winter are most likely due to  
10 unfavorable meteorological conditions. An increase larger than a factor of 4 therefore suggests increasing emissions in winter. Compared to the 4-times increase in  $\text{EC}_{\text{liq.fossil}}$  from summer to winter,  $\text{EC}_{\text{coal}}$  only increases by five times moderately in winter, reflecting the moderate seasonal variation of  $\delta^{13}\text{C}_{\text{EC}}$  (Fig. 4). ~~This suggests that coal combustion is a more constant source over the year 2015/2016.~~ Coal use for heating during wintertime has been decreasing since the year 2008/2009 (Ni et al., 2018), suggested by the more depleted wintertime  $\delta^{13}\text{C}_{\text{EC}}$  in 2015/2016 than that in 2008/2009 (Fig. 4). The decreasing  
15 contribution from coal combustion to EC is consistent with the changes in energy consumption and the decreasing concentrations of coal combustion indicators (e.g., As and Pb) in Xi'an as found in pervious studies (Xu et al., 2016; Ni et al., 2018). The poor separation of fossil sources of EC into coal combustion and liquid fossil fuel combustion could be another reason, but it is difficult to quantify this effect due to our poor knowledge of  $\delta^{13}\text{C}$  source endmembers.

### 3.4 Primary and secondary OC

20 Based on the EC tracer method,  $\text{OC}_{\text{o,nf}}$  is representative of  $\text{SOC}_{\text{nf}}$ , or can be considered an upper limit of  $\text{SOC}_{\text{nf}}$  if cooking sources are significant. The fractions of primary OC ( $\text{POC}_{\text{bb}}$  and  $\text{POC}_{\text{fossil}}$ ) and secondary OC ( $\text{OC}_{\text{o,nf}}$ , and  $\text{SOC}_{\text{fossil}}$ ) in total OC are shown in Figure 6-7 and Table S5S4. On a yearly basis, the most important contributor to OC was  $\text{OC}_{\text{o,nf}}$  (around 35%). For all samples,  $\text{OC}_{\text{o,nf}}$  concentrations were higher than  $\text{POC}_{\text{bb}}$ , despite the wide range of total OC concentrations in different seasons.  $\text{POC}_{\text{bb}}$  contributed a relatively small fraction of OC (15–18%) in the warm period, which increased to 22%  
25 during winter when Xi'an was impacted significantly by biomass burning for heating and cooking. Enhanced biomass burning activities during wintertime in Xi'an have also been reported by measurements of markers for biomass burning such as levoglucosan and  $\text{K}^+$  (T. Zhang et al., 2014; Shen et al., 2017). In winter,  $\text{SOC}_{\text{fossil}}$  was generally more abundant than  $\text{POC}_{\text{fossil}}$ , suggesting that secondary formation rather than primary emissions was a more important contributor to total  $\text{OC}_{\text{fossil}}$ . However, in the warm period, for fossil fuel derived OC ( $\text{POC}_{\text{fossil}}$  and  $\text{SOC}_{\text{fossil}}$ ), primary emissions dominated over  
30 secondary formation (Figs. 6b7b, 6e7c). The  $\text{SOC}_{\text{fossil}}/\text{OC}_{\text{fossil}}$  ratios indicate that  $\text{SOC}_{\text{fossil}}$  contributes roughly 57% to  $\text{OC}_{\text{fossil}}$  in winter versus 37% in the warm period. However, the lower  $\text{SOC}_{\text{fossil}}/\text{OC}_{\text{fossil}}$  ratios in the warm period (especially in summer) than winter in this study is unexpected due to the favorable atmospheric conditions (e.g., higher temperature and

stronger solar radiation). Much higher contribution of  $\text{SOC}_{\text{fossil}}$  to  $\text{OC}_{\text{fossil}}$  (an annual average of around 70%) was found in southern China (Y. L. Zhang et al., 2014). The importance of fossil derived SOC formation to fossil OC during wintertime was also found in other Chinese cities, including Beijing, Shanghai and Guangzhou (Zhang et al., 2015a), ~~suggesting the rapid formation of SOC even in winter (R. J. Huang et al., 2014).~~

5 As for OC from secondary origin (i.e.,  $\text{SOC}_{\text{fossil}}$  and  $\text{OC}_{\text{o.nf}}$ ),  $65 \pm 4\%$  is derived from non-fossil sources throughout of the year, with decreased contribution during wintertime ( $\sim 60\%$ ). Using multiple state-of-the-art analytical techniques (e.g.,  $^{14}\text{C}$  measurements and aerosol mass spectrometry), R. J. Huang et al. (2014) found higher non-fossil contribution to SOC (65–85%) in Xi'an and Guangzhou and lower non-fossil contribution to SOC (35–55%) in Beijing and Shanghai in winter  
10 considerable differences in SOC composition in different cities might be due to the significant difference in SOC precursors from different emission sources and atmospheric processes.

### 3.5 Fossil WIOC vs. fossil EC

Figure ~~7a-8a~~ shows a scatter plot of  $\text{WIOC}_{\text{fossil}}$  and  $\text{EC}_{\text{fossil}}$  concentrations.  $\text{EC}_{\text{fossil}}$  is emitted by the combustion of fossil fuels, mainly coal combustion and vehicle emissions in Xi'an.  $\text{WIOC}_{\text{fossil}}$  increases concurrently with  $\text{EC}_{\text{fossil}}$  suggests that primary  
15 emissions by fossil fuel combustion are an important source for  $\text{WIOC}_{\text{fossil}}$  as well. However, a much higher slope of  $\text{WIOC}_{\text{fossil}}$  against  $\text{EC}_{\text{fossil}}$  was found in winter when compared with warm periods, implying that  $\text{WIOC}_{\text{fossil}}$  and  $\text{EC}_{\text{fossil}}$  originated from different fossil sources in winter and warm periods. In northern China, coal is used widely in winter for heating, which has higher primary OC/EC ratios than vehicle emissions.

The ratio of  $\text{WIOC}_{\text{fossil}}$  to  $\text{EC}_{\text{fossil}}$  ( $(\text{WIOC}/\text{EC})_{\text{fossil}}$ ) can give real world constraints on primary OC/EC ratios of an integrated  
20 fossil source. In the warm period, individual  $(\text{WIOC}/\text{EC})_{\text{fossil}}$  measured in this study ranged from 0.62 to 1.1 (averaged  $0.85 \pm 0.14$ ), falling into the range of typical primary OC/EC ratios for vehicle emissions in tunnel studies (Cheng et al., 2010; Dai et al., 2015; Cui et al., 2016), excluding sample Summer-L with the highest  $(\text{WIOC}/\text{EC})_{\text{fossil}}$  ratio of 1.4 (Fig. ~~7b8b~~). The higher  $(\text{WIOC}/\text{EC})_{\text{fossil}}$  for Summer-L is likely due to the less efficient removal of WIOC in cleaner periods in contrast to more polluted periods during summertime. The more stagnant conditions in more polluted periods (Fig. 3) provide longer  
25 time for photochemical processes and SOC formation contributing formation of WSOC and result in decreased  $(\text{WIOC}/\text{EC})_{\text{fossil}}$  ratios as discussed in Sect. 3.2. The  $(\text{WIOC}/\text{EC})_{\text{fossil}}$  during wintertime averaged  $1.6 \pm 0.1$ , which is closer to the primary OC/EC ratios for coal combustion than that for vehicle emissions (Fig. ~~7b8b~~), suggesting coal combustion is an important fossil source in winter besides vehicle emissions. Higher  $(\text{WIOC}/\text{EC})_{\text{fossil}}$  ratios in winter than in the warm period is also found in Beijing in northern China, with  $(\text{WIOC}/\text{EC})_{\text{fossil}}$  ratio of 1.6–2.4 in winter versus 0.7–1.2 in the warm period  
30 (Liu et al., 2018). However, no strong seasonal trends of  $(\text{WIOC}/\text{EC})_{\text{fossil}}$  ratios was found in southern Chinese cities, such as Shanghai (range: 1.2–1.6; Liu et al., 2018), Guangzhou (range: 0.7–1.4; Liu et al., 2018) and Hainan (around 1; Y. L. Zhang

et al., 2014). Lower  $(\text{WIOC}/\text{EC})_{\text{fossil}}$  ratios were found in the Netherlands ( $0.6 \pm 0.3$ ; Dusek et al., 2017), Switzerland or Sweden (ranging roughly from 0.5 to 1; Szidat et al., 2004, 2009). Those higher values in China than in Europe could be attributed to the combined effects of less efficient combustion of fuel in older vehicles in China and higher primary OC/EC ratios from coal combustion that is more common in China (especially in winter in northern China) than in Europe.

5 In warm period, most of individual  $(\text{WIOC}/\text{EC})_{\text{fossil}}$  falls in the range of primary OC/EC ratio for vehicle emissions, indicating that vehicle emission is the overwhelming fossil source with negligible contribution from coal combustion. However, EC source apportionment by combining  $\text{F}^{14}\text{C}$  and  $\delta^{13}\text{C}$  of EC in this study (Fig. 5) and previous studies in Xi'an (Wang et al., 2015; Ni et al., 2018) indicates that even in the warm period, coal combustion is also an important source of fine particles. Another inconsistency is that the considerable difference in  $(\text{WIOC}/\text{EC})_{\text{fossil}}$  between winter and warm period  
10 suggests strong seasonal variation of coal combustion, whereas only moderate seasonal changes of  $\delta^{13}\text{C}_{\text{EC}}$  were observed. Possible causes of these contradictions will be discussed-explained in the following section.

### 3.6 Fossil OC: water-insoluble OC versus primary OC, water-soluble OC versus secondary OC

Fossil WIOC ( $\text{WIOC}_{\text{fossil}}$ ) and WSOC ( $\text{WSOC}_{\text{fossil}}$ ) ~~have~~has been used widely as proxies of the fossil POC ( $\text{POC}_{\text{fossil}}$ ) and SOC ( $\text{SOC}_{\text{fossil}}$ ), respectively (e.g., Liu et al., 2014; Y. L. Zhang et al., 2014), because primary OC from fossil sources are  
15 mainly WIOC. Figure 8-9 compares the mass concentrations of  $\text{WIOC}_{\text{fossil}}$  with  $\text{POC}_{\text{fossil}}$ , as well as  $\text{WSOC}_{\text{fossil}}$  with  $\text{SOC}_{\text{fossil}}$ . The wider uncertainty ranges of  $\text{POC}_{\text{fossil}}$  and  $\text{SOC}_{\text{fossil}}$  than  $^{14}\text{C}$ -apportioned  $\text{WIOC}_{\text{fossil}}$  and  $\text{WSOC}_{\text{fossil}}$  are mainly propagated from wide range of primary OC/EC ratios for fossil emissions (Sect. 2.5).

The same trend is observed for  $\text{WIOC}_{\text{fossil}}$  and  $\text{POC}_{\text{fossil}}$  throughout the year (Fig. 8a9a). In winter, the averaged  $\text{WIOC}_{\text{fossil}}$  concentrations of  $7.1 \pm 3.5 \mu\text{g m}^{-3}$  (range of  $3.3\text{--}10.1 \mu\text{g m}^{-3} \pm \text{SD}$ ) matched the averaged  $\text{POC}_{\text{fossil}}$  concentrations of  $6.0 \pm 3.3 \mu\text{g m}^{-3}$  (range of  $2.7\text{--}9.2 \mu\text{g m}^{-3}$ ). However, in the warm period, the  $\text{WIOC}_{\text{fossil}}$  concentrations ( $1.8 \pm 1.4 \mu\text{g m}^{-3}$ , with a range of  $0.8\text{--}5.4 \mu\text{g m}^{-3}$ ) do not match the estimated  $\text{POC}_{\text{fossil}}$  ( $2.7 \pm 2.0 \mu\text{g m}^{-3}$ , with a range of  $0.8\text{--}7.1 \mu\text{g m}^{-3}$ ) equally well.  $\text{WIOC}_{\text{fossil}}$  is still highly correlated with  $\text{POC}_{\text{fossil}}$  but deviates strongly from the 1:1 line of  $\text{WIOC}_{\text{fossil}}$  against  $\text{POC}_{\text{fossil}}$ , with a linear regression having a slope of 1.31, and intercept of 0.32 and an  $R^2$  of 0.92. The higher  $\text{POC}_{\text{fossil}}$  than  $\text{WIOC}_{\text{fossil}}$  is well outside the measurement uncertainties, at least for most of samples representing high (H) and medium (M) TC  
25 concentrations (i.e., Spring-H, Spring-M, Summer-H, Autumn-H and Autumn-M). Previous studies have found that a part of WIOC can also be secondary origin from fossil sources in Egypt (Favez et al., 2008), France (Sciare et al., 2011) and Beijing, China (Zhang et al., 2018), but this would cause the opposite trend (higher  $\text{WIOC}_{\text{fossil}}$  than  $\text{POC}_{\text{fossil}}$ ). On the other hand, measurements of fresh emissions from fossil sources show that only a small fraction ( $\sim 10\%$ ) of primary fossil OC is water-soluble (Dai et al., 2015; Yan et al., 2017). The differences between  $\text{POC}_{\text{fossil}}$  and  $\text{WIOC}_{\text{fossil}}$  (25–55%) are much larger than that and therefore the small fraction of primary fossil WSOC can not explain the differences between  $\text{POC}_{\text{fossil}}$  and  $\text{WIOC}_{\text{fossil}}$ .  
30 The best explanation for the differences in summer and spring during polluted periods is the loss of fossil WIOC, indicated



by decreased  $(\text{WIOC}/\text{EC})_{\text{fossil}}$  when pollution gets worse. This is probably due to more stagnant conditions in polluted periods, which allows for accumulation of pollutants and also more time for photochemical processing of WIOC and SOC formation, as discussed in Sect. 3.2. Evaporation of WIOC is not a likely explanation for this trend as temperatures do not differ strongly between clean and polluted periods and partitioning to the gas-phase should be stronger in clean conditions.

5 However, this decreasing trend of  $(\text{WIOC}/\text{EC})_{\text{fossil}}$  with increasing TC is not found in autumn, where  $\text{WIOC}_{\text{fossil}}$  is lower than estimated  $\text{POC}_{\text{fossil}}$  by a roughly constant factor. In the fall wind speed is generally low and not very variable, and photochemical processing would be weaker than in the summer and spring.

Overall, the most likely explanation for the difference between  $\text{WIOC}_{\text{fossil}}$  and  $\text{POC}_{\text{fossil}}$  is the overestimate of  $\text{POC}_{\text{fossil}}$  by the EC tracer method.  $\text{POC}_{\text{fossil}}$  is calculated by multiplying  $\text{EC}_{\text{fossil}}$  with primary OC/EC ratios for fossil sources ( $r_{\text{fossil}}$  in Eq. 11).

10 Thus, an overestimate of  $\text{POC}_{\text{fossil}}$  result ~~have~~ has two causes. First,  $r_{\text{fossil}}$  might be overestimated (as  $\text{EC}_{\text{fossil}}$  is well constrained by  $^{14}\text{C}$ ), which could result either from a too high estimated fraction of coal burning in the warm period, or through rapid evaporation of POC at warmer temperatures. In the warm period, semi-volatile OC from fossil emission sources partitions more readily to the gas-phase leading to lower primary OC/EC ratios compared to winter. This is supported by laboratory studies and ambient observations, which find that the primary OC/EC ratio for vehicle emissions is

15 lower in warm period than in winter (Xie et al., 2017; X. H. H. Huang et al., 2014). Second, during longer residence time in the atmosphere POC might not be chemically stable and  $r_{\text{fossil}}$  decreases with aging time in the atmosphere. This is the only mechanism that can explain the decreasing  $\text{WIOC}_{\text{fossil}}/\text{EC}_{\text{fossil}}$  ratios with higher pollutant concentrations and it is in line with findings from our earlier study that OC loss due to active photochemistry is more intense under high temperature and humidity in a warm period than in a cold winter (Ni et al., 2018).

20 As a consequence, a good match between  $\text{WSOC}_{\text{fossil}}$  and  $\text{SOC}_{\text{fossil}}$  was observed in winter. As shown in Fig. ~~8d~~ 9d, the 3 data points fall close the 1:1 line of  $\text{WSOC}_{\text{fossil}}$  against  $\text{SOC}_{\text{fossil}}$ . However, in the warm period, the data points fall below the 1:1 line of  $\text{WSOC}_{\text{fossil}}$  against  $\text{SOC}_{\text{fossil}}$ , with a linear regression having a slope of 0.62, and intercept of 0.01 and an  $R^2$  of 0.92. Higher  $\text{WSOC}_{\text{fossil}}$  than  $\text{SOC}_{\text{fossil}}$  can be explained by either underestimated  $\text{SOC}_{\text{fossil}}$  or overestimated  $\text{WSOC}_{\text{fossil}}$ , or both.  $\text{SOC}_{\text{fossil}}$  is calculated by subtracting  $\text{POC}_{\text{fossil}}$  from  $\text{OC}_{\text{fossil}}$ . Thus, underestimated  $\text{SOC}_{\text{fossil}}$  in warm period can result directly

25 ~~from overestimated  $\text{POC}_{\text{fossil}}$  due to active OC loss. On the other hand, measurements of fresh emissions from fossil sources show that a small fraction of primary fossil OC is water soluble (Dai et al., 2015; Yan et al., 2017). If the differences between  $\text{WSOC}_{\text{fossil}}$  and  $\text{SOC}_{\text{fossil}}$  are considered as the primary  $\text{WSOC}_{\text{fossil}}$ , the primary  $\text{WSOC}_{\text{fossil}}$  would constitute 25–55%  $\text{POC}_{\text{fossil}}$ , which is much larger than that observed in fresh fossil emissions ( $< 10\%$ ; Dai et al., 2015; Yan et al., 2017). Thus, the small fraction of  $\text{WSOC}$  in primary fossil OC is not enough to explain the differences between  $\text{WSOC}_{\text{fossil}}$  and estimated~~

30  $\text{SOC}_{\text{fossil}}$ .

The comparisons between  $\text{WIOC}_{\text{fossil}}$  and  $\text{POC}_{\text{fossil}}$ ,  $\text{WSOC}_{\text{fossil}}$  and  $\text{SOC}_{\text{fossil}}$  suggest that it is feasible to use  $\text{WIOC}_{\text{fossil}}$  and  $\text{WSOC}_{\text{fossil}}$  as indicator of  $\text{POC}_{\text{fossil}}$  and  $\text{SOC}_{\text{fossil}}$ , respectively, with respect to trends and variations of  $\text{POC}_{\text{fossil}}$  and  $\text{SOC}_{\text{fossil}}$ .

However, the absolute concentrations of  $\text{WIOC}_{\text{fossil}}$  and  $\text{WSOC}_{\text{fossil}}$  are not equal to those of respective estimated  $\text{POC}_{\text{fossil}}$  and  $\text{SOC}_{\text{fossil}}$ , especially in the warm period. If we consider photochemical loss as the primary reason of the differences between  $\text{WIOC}_{\text{fossil}}$  and  $\text{POC}_{\text{fossil}}$ ,  $\text{WSOC}_{\text{fossil}}$  and  $\text{SOC}_{\text{fossil}}$ , then  $^{14}\text{C}$ -based  $\text{WIOC}_{\text{fossil}}$  and  $\text{WSOC}_{\text{fossil}}$  are probably a better approximation for primary and secondary fossil OC, respectively, than  $\text{POC}_{\text{fossil}}$  and  $\text{SOC}_{\text{fossil}}$  estimated using the EC tracer method (Sect. 2.5, Eqs. 7–10).

#### 4 Conclusions

This study presents the first ~~1-year~~ source apportionment of various carbonaceous aerosol fractions, including EC, OC,  $\text{WIOC}$  and  $\text{WSOC}$  in Xi'an, China based on radiocarbon ( $^{14}\text{C}$ ) measurement in four seasons for the year 2015/2016.  $^{14}\text{C}$  analysis shows that non-fossil sources are an important contributor to OC fractions throughout the year, accounting for  $58 \pm 6\%$   $\text{WSOC}$ ,  $53 \pm 4\%$  OC and  $55 \pm 5\%$   $\text{WIOC}$ , whereas fossil sources dominated EC, with non-fossil sources contributing  $18 \pm 6\%$  EC on the yearly average. An increased contribution of non-fossil sources to all carbon fractions were observed in winter, because of enhanced non-fossil activities in winter, mainly biomass burning. Fossil sources of EC were further divided into liquid fossil fuel combustion (i.e., vehicle emissions) and coal combustion by combining radiocarbon and stable carbon signatures in a Bayesian Markov chain Monte Carlo (MCMC) approach. The MCMC results indicate that liquid fossil fuel combustion dominated EC over the whole year, contributing more than half of EC in the warm period and  $\sim 46\%$  of EC in winter, despite the source changes in different seasons. The remaining fossil EC was contributed by coal combustion: in winter, coal combustion ( $\sim 25\%$ ) and biomass burning ( $\sim 28\%$ ) equally affected EC, whereas in the warm period, coal combustion contributed a larger fraction of EC than biomass burning did.

Concentrations of all carbon fractions were higher in winter than in the warm period. Non-fossil  $\text{WSOC}$  was responsible for  $\sim 35\%$  of the increased OC mass in winter, followed by non-fossil  $\text{WIOC}$  ( $\sim 24\%$ ), fossil  $\text{WIOC}$  ( $\sim 22\%$ ;  $\text{WIOC}_{\text{fossil}}$ ) and fossil  $\text{WSOC}$  ( $\sim 19\%$ ;  $\text{WSOC}_{\text{fossil}}$ ). Fossil EC and biomass burning EC on average accounted for 62 % and 38 % increased EC mass in winter. Fossil  $\text{WIOC}/\text{EC}$  ratios ( $(\text{WIOC}/\text{EC})_{\text{fossil}}$ ) in the warm period averaged  $0.85 \pm 0.14$ , well within the range of typical primary OC/EC ratios for vehicle emissions in tunnel studies (Cheng et al., 2010; Dai et al., 2015; Cui et al., 2016). Much higher  $(\text{WIOC}/\text{EC})_{\text{fossil}}$  values were found in winter, with an average of  $1.6 \pm 0.11$ , which is closer to the primary OC/EC ratios for coal combustion ( $2.38 \pm 0.44$ ; Sect. 2.5) than that for vehicle emissions, indicating additional contribution from coal burning in winter. Higher  $(\text{WIOC}/\text{EC})_{\text{fossil}}$  in winter than in the warm period is also found in Beijing in northern China (Liu et al., 2018). However, no strong seasonal trends of  $(\text{WIOC}/\text{EC})_{\text{fossil}}$  was found in southern China, such as Shanghai (Liu et al., 2018), Guangzhou (Liu et al., 2018) and Hainan (Y. L. Zhang et al., 2014), where there is no official heating season using coal.

The majority (60–76%) of the non-fossil OC was water-soluble in all seasons, probably resulting from the mostly water-soluble biomass-burning POC and SOC and biogenic SOC. The fossil OC in winter is less water-soluble than warm period,

suggesting an enhanced SOC formation from fossil VOCs from vehicle emissions and/or coal burning in the warm period. In spring and summer, there is a clear increasing trend of  $(\text{WSOC}/\text{OC})_{\text{fossil}}$  and decreasing trend of  $(\text{WIOC}/\text{EC})_{\text{fossil}}$  in more polluted conditions. This suggests that the fossil WSOC formation as well as fossil WIOC removal increase under the stagnant conditions that characterize polluted periods and allow for accumulation of pollutants and also photochemical processing and secondary OC formation. WIOC<sub>fossil</sub> and WSOC<sub>fossil</sub> have been used widely as proxies of the [primary and secondary fossil OC](#) ( $\text{POC}_{\text{fossil}}$ ) and  $\text{SOC}_{\text{fossil}}$ , respectively, since primary fossil sources tend to produce mainly WIOC. In winter, mass concentrations of WIOC<sub>fossil</sub> were comparable to POC<sub>fossil</sub> and WSOC<sub>fossil</sub> to SOC<sub>fossil</sub>, where POC<sub>fossil</sub> and SOC<sub>fossil</sub> are estimated using EC tracer method. However, the agreement was worse in the warm period, even though the respective concentrations were highly correlated. [In other words, This indicates that it is feasible to use variations in WIOC<sub>fossil</sub> and WSOC<sub>fossil</sub> follow as indicator of POC<sub>fossil</sub> and SOC<sub>fossil</sub>, respectively, with respect to similar trends and variations of as POC<sub>fossil</sub> and SOC<sub>fossil</sub>, respectively.](#) However, the absolute concentrations of WIOC<sub>fossil</sub> and WSOC<sub>fossil</sub> are not equal to those of estimated POC<sub>fossil</sub> and SOC<sub>fossil</sub>, especially in the warm period. The higher mass of POC<sub>fossil</sub> than WIOC<sub>fossil</sub> in the warm period was probably due to overestimated POC<sub>fossil</sub> (thus underestimated SOC<sub>fossil</sub>) resulted from overestimated primary fossil OC/EC ratios. In the warm period, at relatively high temperatures, semi-volatile OC from emission sources becomes volatilized more quickly owing to higher temperatures, leading to lower primary OC/EC ratios than other seasons. This is in line with the laboratory and ambient observations that the primary OC/EC ratio for vehicle emissions is lower in the warm period than in winter (Xie et al., 2017; X. H. H. Huang et al., 2014), and the findings from our earlier study that in the warm period, that photochemical OC loss is active and affect final OC concentrations (Ni et al., 2018). We suggest that WIOC<sub>fossil</sub> and WSOC<sub>fossil</sub> are probably a better approximation for primary and secondary fossil OC, respectively, than POC<sub>fossil</sub> and SOC<sub>fossil</sub> estimated using the EC tracer method.

### Data availability

All data needed to evaluate the conclusions in this study are present in the paper and the Supplement. Additional data related to this paper are available upon request to the corresponding author.

### Author contributions

UD, RJH, HN and JC designed the study. HN and HD conducted the  $^{14}\text{C}$  measurements. HN, HD and UD interpreted the  $^{14}\text{C}$  data. JG performed the measurements of stable isotope  $^{13}\text{C}$ . HN and UD interpreted the  $^{13}\text{C}$  data. HN and UD prepared display items and HN wrote the manuscript. All authors commented on and discussed the manuscript.

### **Competing interests**

The authors declare that they have no conflict of interest.

### **Acknowledgments**

This work was supported by the National Key Research and Development Program of China (no. 2017YFC0212701), the  
5 National Natural Science Foundation of China (NSFC; no. 91644219 and 41877408), and a KNAW project (no. 530-  
5CDP30). The authors acknowledge the financial support from the Gratama Foundation. Special thanks are given to Dipayan  
Paul, Marc Bleeker and Henk Been for their help with the AMS measurements at CIO, and to Anita Aerts-Bijma and Dicky  
van Zonneveld for her help with <sup>14</sup>C data correction at CIO.

## References

- Akagi, S. K., Yokelson, R. J., Wiedinmyer, C., Alvarado, M. J., Reid, J. S., Karl, T., Crouse, J. D., and Wennberg, P. O.: Emission factors for open and domestic biomass burning for use in atmospheric models, *Atmos. Chem. Phys.*, 11, 4039-4072, <https://doi.org/10.5194/acp-11-4039-2011>, 2011.
- 5 Andersson, A., Deng, J., Du, K., Zheng, M., Yan, C., Sköld, M., and Gustafsson, Ö.: Regionally-varying combustion sources of the January 2013 severe haze events over eastern China, *Environ. Sci. Technol.*, 49, 2038–2043, 2015.
- [Bernardoni, V., Calzolari, G., Chiari, M., Fedi, M., Lucarelli, F., Nava, S., Piazzalunga, A., Riccobono, F., Taccetti, F., Valli, G., and Vecchi, R.: Radiocarbon analysis on organic and elemental carbon in aerosol samples and source apportionment at an urban site in Northern Italy, \*J. Aerosol Sci.\*, 56, 88–99, doi:10.1016/j.jaerosci.2012.06.001, 2013.](#)
- 10 Cao, F., Zhang, Y., Ren, L., Liu, J., Li, J., Zhang, G., Liu, D., Sun, Y., Wang, Z., Shi, Z., and Fu, P.: New insights into the sources and formation of carbonaceous aerosols in China: potential applications of dual-carbon isotopes, *Natl. Sci. Rev.*, 4, 804–806, 2017.
- Cao, J.-J., Chow, J. C., Tao, J., Lee, S.C., Watson, J. G., Ho, K.F., Wang, G.H., Zhu, C.S., and Han, Y.M.: Stable carbon isotopes in aerosols from Chinese cities: influence of fossil fuels, *Atmos. Environ.*, 45, 1359–1363, 2011.
- 15 Cao, J.-J., Shen, Z.-X., Chow, J. C., Watson, J. G., Lee, S.-C., Tie, X.-X., Ho, K.-F., Wang, G.-H., and Han, Y.-M.: Winter and summer PM<sub>2.5</sub> chemical compositions in fourteen Chinese cities, *J. Air Waste Manage.*, 62, 1214-1226, <https://doi.org/10.1080/10962247.2012.701193>, 2012.
- Cao, J.-J., Zhu, C.-S., Tie, X.-X., Geng, F.-H., Xu, H.-M., Ho, S. S. H., Wang, G.-H., Han, Y.-M., and Ho, K.-F.: Characteristics and sources of carbonaceous aerosols from Shanghai, China, *Atmos. Chem. Phys.*, 13, 803-817, <https://doi.org/10.5194/acp-13-803-2013>, 2013.
- 20 Cavalli, F., Viana, M., Yttri, K. E., Genberg, J., and Putaud, J.-P.: Toward a standardised thermal-optical protocol for measuring atmospheric organic and elemental carbon: the EUSAAR protocol, *Atmos. Meas. Tech.*, 3, 79-89, <https://doi.org/10.5194/amt-3-79-2010>, 2010.
- Cheng, C., Wang, G., Zhou, B., Meng, J., Li, J., Cao, J., and Xiao, S.: Comparison of dicarboxylic acids and related compounds in aerosol samples collected in Xi'an, China during haze and clean periods, *Atmos. Environ.*, 81, 443-449, 2013.
- 25 Cheng, Y., Lee, S. C., Ho, K. F., Chow, J. C., Watson, J. G., Louie, P. K. K., Cao, J. J., and Hai, X.: Chemically-specified on-road PM<sub>2.5</sub> motor vehicle emission factors in Hong Kong, *Sci. Total Environ.*, 408, 1621-1627, <http://dx.doi.org/10.1016/j.scitotenv.2009.11.061>, 2010.
- Cui, M., Chen, Y., Tian, C., Zhang, F., Yan, C., and Zheng, M.: Chemical composition of PM<sub>2.5</sub> from two tunnels with different vehicular fleet characteristics, *Sci. Total Environ.*, 550, 123-132, <http://dx.doi.org/10.1016/j.scitotenv.2016.01.077>, 2016.
- 30 Dai, S., Bi, X., Chan, L. Y., He, J., Wang, B., Wang, X., Peng, P., Sheng, G., and Fu, J.: Chemical and stable carbon isotopic composition of PM<sub>2.5</sub> from on-road vehicle emissions in the PRD region and implications for vehicle emission control policy, *Atmos. Chem. Phys.*, 15, 3097-3108, <https://doi.org/10.5194/acp-15-3097-2015>, 2015.
- 35 Dusek, U., Ten Brink, H., Meijer, H., Kos, G., Mrozek, D., Röckmann, T., Holzinger, R., and Weijers, E.: The contribution of fossil sources to the organic aerosol in the Netherlands, *Atmos. Environ.*, 74, 169-176, 2013.
- Dusek, U., Monaco, M., Prokopiou, M., Gongriep, F., Hitzenberger, R., Meijer, H. A. J., and Röckmann, T.: Evaluation of a two-step thermal method for separating organic and elemental carbon for radiocarbon analysis, *Atmos. Meas. Tech.*, 7, 1943-1955, <https://doi.org/10.5194/amt-7-1943-2014>, 2014.
- 40 Dusek, U., Hitzenberger, R., Kasper-Giebl, A., Kistler, M., Meijer, H. A. J., Szidat, S., Wacker, L., Holzinger, R., and Röckmann, T.: Sources and formation mechanisms of carbonaceous aerosol at a regional background site in the Netherlands:

- insights from a year-long radiocarbon study, *Atmos. Chem. Phys.*, 17, 3233-3251, <https://doi.org/10.5194/acp-17-3233-2017>, 2017.
- 5 Elser, M., Huang, R.-J., Wolf, R., Slowik, J. G., Wang, Q., Canonaco, F., Li, G., Bozzetti, C., Daellenbach, K. R., Huang, Y., Zhang, R., Li, Z., Cao, J., Baltensperger, U., El-Haddad, I., and Prévôt, A. S. H.: New insights into PM<sub>2.5</sub> chemical composition and sources in two major cities in China during extreme haze events using aerosol mass spectrometry, *Atmos. Chem. Phys.*, 16, 3207-3225, <https://doi.org/10.5194/acp-16-3207-2016>, 2016.
- Fang, W., Du, K., Andersson, A., Xing, Z., Cho, C., Kim, S. W., Deng, J., and Gustafsson, Ö.: Dual-isotope constraints on seasonally-resolved source fingerprinting of Black Carbon aerosols in sites of the four emission hotspot regions of China, *J. Geophys. Res.-Atmos.*, 123, 11735-11747, <https://doi.org/10.1029/2018JD028607>, 2018.
- 10 Favez, O., Sciare, J., Cachier, H., Alfaro, S. C., and Abdelwahab, M. M.: Significant formation of water-insoluble secondary organic aerosols in semi-arid urban environment, *Geophys. Res. Lett.*, 35, L15801, <https://doi.org/10.1029/2008GL034446>, 2008.
- [Gelencsér, A., May, B., Simpson, D., Sánchez-Ochoa, A., Kasper-Giebl, A., Puxbaum, H., Caseiro, A., Pio, C., and Legrand, M.: Source apportionment of PM<sub>2.5</sub> organic aerosol over Europe: Primary/secondary, natural/anthropogenic, and fossil/biogenic origin, \*J. Geophys. Res.\*, 112, D23S04, doi:10.1029/2006JD008094, 2007.](#)
- 15 [Guo, S., Hu, M., Guo, Q., Zhang, X., Zheng, M., Zheng, J., Chang, C. C., Schauer, J. J., and Zhang, R.: Primary sources and secondary formation of organic aerosols in Beijing, China, \*Environ. Sci. Technol.\*, 46, 9846–9853, 2012.](#)
- Gustafsson, Ö., Kruså, M., Zencak, Z., Sheesley, R. J., Granat, L., Engström, E., Praveen, P., Rao, P., Leck, C., and Rodhe, H.: Brown clouds over South Asia: biomass or fossil fuel combustion?, *Science*, 323, 495-498, 2009.
- 20 Hallquist, M., Wenger, J. C., Baltensperger, U., Rudich, Y., Simpson, D., Claeys, M., Dommen, J., Donahue, N. M., George, C., Goldstein, A. H., Hamilton, J. F., Herrmann, H., Hoffmann, T., Iinuma, Y., Jang, M., Jenkin, M. E., Jimenez, J. L., Kiendler-Scharr, A., Maenhaut, W., McFiggans, G., Mentel, Th. F., Monod, A., Prévôt, A. S. H., Seinfeld, J. H., Surratt, J. D., Szmigielski, R., and Wildt, J.: The formation, properties and impact of secondary organic aerosol: current and emerging issues, *Atmos. Chem. Phys.*, 9, 5155-5236, <https://doi.org/10.5194/acp-9-5155-2009>, 2009.
- 25 Heal, M. R.: The application of carbon-14 analyses to the source apportionment of atmospheric carbonaceous particulate matter: a review, *Anal. Bioanal. Chem.*, 406, 81-98, 2014.
- Hua, Q. and Barbetti, M.: Review of tropospheric bomb <sup>14</sup>C data for carbon cycle modeling and age calibration purposes, *Radiocarbon*, 46, 1273-1298, 2004.
- 30 Huang, R. J., Zhang, Y., Bozzetti, C., Ho, K. F., Cao, J. J., Han, Y., Daellenbach, K. R., Slowik, J.G., Platt, S. M., Canonaco, F., Zotter, P., Wolf, R., Pieber, S. M., Bruns, E. A., Crippa, M., Ciarelli, G., Piazzalunga, A., Schwikowski, M., Abbaszade, G., SchnelleKreis, J., Zimmermann, R., An, Z., Szidat, S., Baltensperger, U., El Haddad, I., and Prévôt, A. S. H.: High secondary aerosol contribution to particulate pollution during haze events in China, *Nature*, 514, 218–222, doi:10.1038/nature13774, 2014.
- Huang, X., Li, M., Li, J., and Song, Y.: A high-resolution emission inventory of crop burning in fields in China based on MODIS Thermal Anomalies/Fire products, *Atmos. Environ.*, 50, 9-15, 2012.
- 35 Huang, X. H. H., Bian, Q. J., Louie, P. K. K., and Yu, J. Z.: Contributions of vehicular carbonaceous aerosols to PM<sub>2.5</sub> in a roadside environment in Hong Kong, *Atmos. Chem. Phys.*, 14, 9279-9293, <https://doi.org/10.5194/acp-14-9279-2014>, 2014.
- Irei, S., Rudolph, J., Huang, L., Auld, J., and Hastie, D.: Stable carbon isotope ratio of secondary particulate organic matter formed by photooxidation of toluene in indoor smog chamber, *Atmos. Environ.*, 45, 856–862, 2011.
- 40 Jacobson, M. C., Hansson, H. C., Noone, K. J., and Charlson, R. J.: Organic atmospheric aerosols: review and state of the science, *Rev. Geophys.*, 38, 267–294, 2000.

- Kanakidou, M., Seinfeld, J. H., Pandis, S. N., Barnes, I., Dentener, F. J., Facchini, M. C., Van Dingenen, R., Ervens, B., Nenes, A., Nielsen, C. J., Swietlicki, E., Putaud, J. P., Balkanski, Y., Fuzzi, S., Horth, J., Moortgat, G. K., Winterhalter, R., Myhre, C. E. L., Tsigaridis, K., Vignati, E., Stephanou, E. G., and Wilson, J.: Organic aerosol and global climate modelling: a review, *Atmos. Chem. Phys.*, 5, 1053-1123, <https://doi.org/10.5194/acp-5-1053-2005>, 2005.
- 5 Kondo, Y., Miyazaki, Y., Takegawa, N., Miyakawa, T., Weber, R. J., Jimenez, J. L., Zhang, Q., and Worsnop, D. R.: Oxygenated and water-soluble organic aerosols in Tokyo, *J. Geophys. Res.-Atmos.*, 112, D01203, doi:10.1029/2006JD007056, 2007.
- [Levin, I., B. Kromer, and Hammer, S.: Atmospheric  \$\Delta^{14}\text{CO}\_2\$  trend in Western European background air from 2000 to 2012, \*Tellus B\*, 65, 20092, doi: 10.3402/tellusb.v65i0.20092, 2013.](#)
- 10 Levin, I., Hammer, S., Kromer, B., and Meinhardt, F.: Radiocarbon observations in atmospheric  $\text{CO}_2$ : determining fossil fuel  $\text{CO}_2$  over Europe using Jungfraujoch observations as background, *Sci. Total Environ.*, 391, 211-216, 2008.
- Levin, I., Naegler, T., Kromer, B., Diehl, M., Francey, R. J., Gomez-Pelaez, A., Steele, P., Wagenbach, D., Weller, R., and Worthy, D.: Observations and modelling of the global distribution and long-term trend of atmospheric  $^{14}\text{CO}_2$ , *Tellus B*, 62, 26-46, 2010.
- 15 Lewis, C. W., Klouda, G. A., and Ellenson, W. D.: Radiocarbon measurement of the biogenic contribution to summertime  $\text{PM}_{2.5}$  ambient aerosol in Nashville, TN, *Atmos. Environ.*, 38, 6053-6061, 2004.
- Li, C., Bosch, C., Kang, S., Andersson, A., Chen, P., Zhang, Q., Cong, Z., Chen, B., Qin, D., and Gustafsson, Ö.: Sources of black carbon to the Himalayan-Tibetan Plateau glaciers, *Nat. Commun.*, 7, 12574, doi: 10.1038/ncomms12574, 2016.
- Liu, D., Li, J., Zhang, Y., Xu, Y., Liu, X., Ding, P., Shen, C., Chen, Y., Tian, C., and Zhang, G.: The use of levoglucosan and radiocarbon for source apportionment of  $\text{PM}_{2.5}$  carbonaceous aerosols at a background site in East China, *Environ. Sci. Technol.*, 47, 10454-10461, 2013.
- Liu, D., Li, J., Cheng, Z., Zhong, G., Zhu, S., Ding, P., Shen, C., Tian, C., Chen, Y., Zhi, G., and Zhang, G.: Sources of non-fossil-fuel emissions in carbonaceous aerosols during early winter in Chinese cities, *Atmos. Chem. Phys.*, 17, 11491-11502, <https://doi.org/10.5194/acp-17-11491-2017>, 2017.
- 25 Liu, D., Vonwiller, M., Li, J., Liu, J., Szidat, S., Zhang, Y., Tian, C., Chen, Y., Cheng, Z., Zhong, G., Fu, P., and Zhang, G.: Fossil and non-fossil sources of organic and elemental carbon aerosols in Beijing, Shanghai and Guangzhou: seasonal variation of carbon source, *Atmos. Chem. Phys. Discuss.*, <https://doi.org/10.5194/acp-2018-295>, 2018.
- Liu, J., Li, J., Zhang, Y., Liu, D., Ding, P., Shen, C., Shen, K., He, Q., Ding, X., Wang, X., Chen, D., and Zhang, G.: Source apportionment using radiocarbon and organic tracers for  $\text{PM}_{2.5}$  carbonaceous aerosols in Guangzhou, South China: contrasting local-and regional-scale aaze events, *Environ. Sci. Technol.*, 48, 12002-12011, 2014.
- 30 Liu, J., Li, J., Liu, D., Ding, P., Shen, C., Mo, Y., Wang, X., Luo, C., Cheng, Z., Szidat, S., Zhang, Y., Chen, Y., and Zhang, G.: Source apportionment and dynamic changes of carbonaceous aerosols during the haze bloom-decay process in China based on radiocarbon and organic molecular tracers, *Atmos. Chem. Phys.*, 16, 2985-2996, <https://doi.org/10.5194/acp-16-2985-2016>, 2016a.
- 35 Liu, J., Li, J., Vonwiller, M., Liu, D., Cheng, H., Shen, K., Salazar, G., Agrios, K., Zhang, Y., He, Q., Ding, X., Zhong, G., Wang, X., Szidat, S., and Zhang, G.: The importance of non-fossil sources in carbonaceous aerosols in a megacity of central China during the 2013 winter haze episode: a source apportionment constrained by radiocarbon and organic tracers, *Atmos. Environ.*, 144, 60-68, 2016b.
- 40 Mayol-Bracero, O. L., Guyon, P., Graham, B., Roberts, G., Andreae, M. O., Decesari, S., Facchini, M. C., Fuzzi, S., and Artaxo, P.: Water-soluble organic compounds in biomass burning aerosols over Amazonia, 2, apportionment of the chemical composition and importance of the polyacidic fraction, *J. Geophys. Res.-Atmos.*, 107(D20), 8091, doi:10.1029/2001JD000522, 2002.

- Miyazaki, Y., Kondo, Y., Takegawa, N., Komazaki, Y., Fukuda, M., Kawamura, K., Mochida, M., Okuzawa, K., and Weber, R. J.: Time-resolved measurements of water-soluble organic carbon in Tokyo, *J. Geophys. Res.-Atmos.*, 111, D23206, doi:[10.1029/2006JD007125](https://doi.org/10.1029/2006JD007125), 2006
- 5 Mohn, J., Szidat, S., Fellner, J., Rechberger, H., Quartier, R., Buchmann, B., and Emmenegger, L.: Determination of biogenic and fossil CO<sub>2</sub> emitted by waste incineration based on <sup>14</sup>C and mass balances, *Bioresource Technol.*, 99, 6471–6479, 2008.
- Mook, W. G. and van der Plicht, J.: Reporting <sup>14</sup>C activities and concentrations, *Radiocarbon*, 41, 227–239, 1999.
- Ni, H., Tian, J., Wang, X., Wang, Q., Han, Y., Cao, J., Long, X., Chen, L. W. A., Chow, J. C., Watson, J. G., Huang, R.-J., and Dusek, U.: PM<sub>2.5</sub> emissions and source profiles from open burning of crop residues, *Atmos. Environ.*, 169, 229–237, <https://doi.org/10.1016/j.atmosenv.2017.08.063>, 2017.
- 10 Ni, H., Huang, R.-J., Cao, J., Liu, W., Zhang, T., Wang, M., Meijer, H. A. J., and Dusek, U.: Source apportionment of carbonaceous aerosols in Xi'an, China: insights from a full year of measurements of radiocarbon and the stable isotope <sup>13</sup>C, *Atmos. Chem. Phys.*, 18, 16363–16383, <https://doi.org/10.5194/acp-18-16363-2018>, 2018.
- Nozière, B., Kalberer, M., Claeys, M., Allan, J., D'Anna, B., Decesari, S., Finessi, E., Glasius, M., Grgić, I., Hamilton, J. F., Hoffmann, T., Inuma, Y., Jaoui, M., Kahnt, A., Kampf, C. J., Kourtev, I., Maenhaut, W., Marsden, N., Saarikoski, S., Schnelle-Kreis, J., Surratt, J. D., Szidat, S., Szmigielski, R., and Wisthaler, A.: The molecular identification of organic compounds in the atmosphere: state of the art and challenges, *Chem. Rev.*, 115, 3919–3983, [10.1021/cr5003485](https://doi.org/10.1021/cr5003485), 2015.
- 15 Palstra, S. W. and Meijer, H. A.: Biogenic carbon fraction of biogas and natural gas fuel mixtures determined with <sup>14</sup>C, *Radiocarbon*, 56, 7–28, 2014.
- 20 Parnell, A. C., Inger, R., Bearhop, S., and Jackson, A. L.: Source partitioning using stable isotopes: coping with too much variation, *PloS ONE*, 5, e9672, 2010.
- Parnell, A. C., Phillips, D. L., Bearhop, S., Semmens, B. X., Ward, E. J., Moore, J. W., Jackson, A. L., Grey, J., Kelly, D. J., and Inger, R.: Bayesian stable isotope mixing models, *Environmetrics*, 24, 387–399, 2013.
- Pavuluri, C. M. and Kawamura, K.: Enrichment of <sup>13</sup>C in diacids and related compounds during photochemical processing of aqueous aerosols: new proxy for organic aerosols aging, *Sci. Rep.*, 6, 36467, 2016.
- 25 Pöschl, U.: Atmospheric aerosols: composition, transformation, climate and health effects, *Angew. Chem. Int. Ed. Engl.*, 44, 7520–7540, 2005.
- Reimer, P. J., Brown, T. A., and Reimer, R. W.: Discussion: reporting and calibration of post-bomb <sup>14</sup>C data, *Radiocarbon*, 46, 1299–1304, 2004.
- 30 Ruff, M., Wacker, L., Gäggeler, H., Suter, M., Synal, H.-A., and Szidat, S.: A gas ion source for radiocarbon measurements at 200 kV, *Radiocarbon*, 49, 307–314, 2007.
- Salazar, G., Zhang, Y. L., Agrios, K., and Szidat, S.: Development of a method for fast and automatic radiocarbon measurement of aerosol samples by online coupling of an elemental analyzer with a MICADAS AMS, *Nucl. Instrum. Meth. B*, 361, 163–167, <https://doi.org/10.1016/j.nimb.2015.03.051>, 2015.
- 35 Sannigrahi, P., Sullivan, A. P., Weber, R. J., and Ingall, E. D.: Characterization of water-soluble organic carbon in urban atmospheric aerosols using solid-state <sup>13</sup>C NMR spectroscopy, *Environ. Sci. Technol.*, 40, 666–672, 2006.
- Sciare, J., d'Argouges, O., Sarda-Estève, R., Gaimoz, C., Dolgorouky, C., Bonnaire, N., Favez, O., Bonsang, B., and Gros, V.: Large contribution of water-insoluble secondary organic aerosols in the region of Paris (France) during wintertime, *J. Geophys. Res.-Atmos.*, 116, D22203, doi:[10.1029/2011JD015756](https://doi.org/10.1029/2011JD015756), 2011.
- 40 Sheesley, R. J., Kirillova, E., Andersson, A., Krusá, M., Praveen, P., Budhavant, K., Safai, P. D., Rao, P., and Gustafsson, Ö.: Year-round radiocarbon-based source apportionment of carbonaceous aerosols at two background sites in South Asia, *J. Geophys. Res.-Atmos.*, 117, 2012.



- Shen, Z., Lei, Y., Zhang, L., Zhang, Q., Zeng, Y., Tao, J., Zhu, C., Cao, J., Xu, H., and Liu, S.: Methanol extracted brown carbon in PM<sub>2.5</sub> over Xi'an, China: seasonal variation of optical properties and sources identification, *Aerosol Sci. Eng.*, 1, 57-65, 1-9, 10.1007/s41810-017-0007-z, 2017.
- Streets, D., Yarber, K., Woo, J. H., and Carmichael, G.: Biomass burning in Asia: annual and seasonal estimates and atmospheric emissions, *Global Biogeochem. Cy.*, 17, 1099, <https://doi.org/10.1029/2003GB002040>, 2003.
- 5 [Stuiver, M. and Polach, H. A.: Discussion: Reporting of <sup>14</sup>C data, \*Radiocarbon\*, 19, 355–363, 1977.](#)
- Sun, J., Shen, Z., Cao, J., Zhang, L., Wu, T., Zhang, Q., Yin, X., Lei, Y., Huang, Y., Huang, R., Liu, S., Han, Y., Xu, H., Zheng, C., and Liu, P.: Particulate matters emitted from maize straw burning for winter heating in rural areas in Guanzhong Plain, China: current emission and future reduction, *Atmos. Res.*, 184, 66–76, 2017.
- 10 Synal, H.-A., Stocker, M., and Suter, M.: MICADAS: A new compact radiocarbon AMS system, *Nucl. Instrum. Meth. B*, 259, 7-13, <https://doi.org/10.1016/j.nimb.2007.01.138>, 2007.
- Szidat, S., Jenk, T. M., Gäggeler, H. W., Synal, H. A., Fisseha, R., Baltensperger, U., Kalberer, M., Samburova, V., Reimann, S., Kasper-Giebl, A., and Hajdas, I.: Radiocarbon (<sup>14</sup>C)-deduced biogenic and anthropogenic contributions to organic carbon (OC) of urban aerosols from Zürich, Switzerland, *Atmos. Environ.*, 38, 4035-4044, 15 <https://doi.org/10.1016/j.atmosenv.2004.03.066>, 2004.
- Szidat, S., Ruff, M., Perron, N., Wacker, L., Synal, H.-A., Hallquist, M., Shannigrahi, A. S., Yttri, K. E., Dye, C., and Simpson, D.: Fossil and non-fossil sources of organic carbon (OC) and elemental carbon (EC) in Göteborg, Sweden, *Atmos. Chem. Phys.*, 9, 1521-1535, <https://doi.org/10.5194/acp-9-1521-2009>, 2009.
- Szidat, S., Bench, G., Bernardoni, V., Calzolari, G., Czimczik, C.I., Derendorp, L., Dusek, U., Elder, K., Fedi, M.E., Genberg, J., Gustafsson, Ö., Kirillova, E., Kondo, M., McNichol, A. P., Perron, N., Santos, G. M., Stenström, K., Swietlicki, E., Uchida, M., Vecchi, R., Wachter, L., Zhang, Y., and Prévôt, A. S. H.: Intercomparison of <sup>14</sup>C analysis of carbonaceous aerosols: exercise 2009. *Radiocarbon*, 55, 1496-1509, 2013.
- 20 Tao, J., Zhang, L., Cao, J., and Zhang, R.: A review of current knowledge concerning PM<sub>2.5</sub> chemical composition, aerosol optical properties and their relationships across China, *Atmos. Chem. Phys.*, 17, 9485-9518, <https://doi.org/10.5194/acp-17-9485-2017>, 2017.
- 25 [Vlachou, A., Daellenbach, K. R., Bozzetti, C., Chazeau, B., Salazar, G. A., Szidat, S., Jaffrezo, J.-L., Hueglin, C., Baltensperger, U., Haddad, I. E., and Prévôt, A. S. H.: Advanced source apportionment of carbonaceous aerosols by coupling offline AMS and radiocarbon size-segregated measurements over a nearly 2-year period, \*Atmos. Chem. Phys.\*, 18, 6187–6206. <https://doi.org/10.5194/acp-18-6187-2018>.](#)
- 30 Wacker, L., Christl, M., and Synal, H. A.: Bats: A new tool for AMS data reduction, *Nucl. Instrum. Meth. B*, 268, 976-979, <https://doi.org/10.1016/j.nimb.2009.10.078>, 2010.
- Wang, P., Cao, J.J., Shen, Z. X., Han, Y. M., Lee, S. C., Huang, Y., Zhu, C. S., Wang, Q. Y., Xu, H. M., and Huang, R. J.: Spatial and seasonal variations of PM<sub>2.5</sub> mass and species during 2010 in Xi'an, China, *Sci. Total Environ.*, 508, 477-487, 2015.
- 35 Weber, R. J., Sullivan, A. P., Peltier, R. E., Russell, A., Yan, B., Zheng, M., de Gouw, J., Warneke, C., Brock, C., Holloway, J. S., Atlas, E. L., and Edgerton, E.: A study of secondary organic aerosol formation in the anthropogenic-influenced southeastern United States, *J. Geophys. Res.-Atmos.*, 112, D13302, doi:10.1029/2007JD008408, 2007.
- Winiger, P., Andersson, A., Yttri, K. E., Tunved, P., and Gustafsson, Ö.: Isotope-based source apportionment of EC aerosol particles during winter high-pollution events at the Zeppelin Observatory, Svalbard, *Environ. Sci. Technol.*, 49, 11959–11966, 10.1021/acs.est.5b02644, 2015.
- 40 Winiger, P., Andersson, A., Eckhardt, S., Stohl, A., and Gustafsson, Ö.: The sources of atmospheric black carbon at a European gateway to the Arctic, *Nat. Commun.*, 7, 2016.

- Wozniak, A. S., Bauer, J. E., and Dickhut, R. M.: Characteristics of water-soluble organic carbon associated with aerosol particles in the eastern United States, *Atmos. Environ.*, 46, 181-188, 2012.
- Xie, M., Hays, M., and Holder, A.: Light-absorbing organic carbon from prescribed and laboratory biomass burning and gasoline vehicle emissions, *Sci. Rep.*, 7, 7318, 2017.
- 5 Xu, H., Cao, J., Chow, J. C., Huang, R.-J., Shen, Z., Chen, L. A., Ho, K. F., and Watson, J. G.: Inter-annual variability of wintertime PM<sub>2.5</sub> chemical composition in Xi'an, China: evidences of changing source emissions, *Sci. Total Environ.*, 545, 546–555, 2016.
- Yan, C., Zheng, M., Bosch, C., Andersson, A., Desyaterik, Y., Sullivan, A. P., Collett, J. L., Zhao, B., Wang, S., He, K. and Gustafsson, Ö.: Important fossil source contribution to brown carbon in Beijing during winter, *Sci. Rep.*, 7, 2017.
- 10 Zenker, K., Vonwiller, M., Szidat, S., Calzolari, G., Giannoni, M., Bernardoni, V., Jedynska, A. D., Henzing, B., Meijer, H. A., and Dusek, U.: Evaluation and inter-comparison of oxygen-based OC-EC separation methods for radiocarbon analysis of ambient aerosol particle samples, *Atmosphere*, 8, 226, 2017.
- Zhang, T., Cao, J.-J., Chow, J. C., Shen, Z.-X., Ho, K.-F., Ho, S. S. H., Liu, S.-X., Han, Y.-M., Watson, J. G., Wang, G.-H., and Huang, R.-J.: Characterization and seasonal variations of levoglucosan in fine particulate matter in Xi'an, China, *J. Air*
- 15 *Waste Manage.*, 64, 1317–1327, 10.1080/10962247.2014.944959, 2014.
- [Zhang, Y. L., Perron, N., Ciobanu, V. G., Zotter, P., Minguillón, M. C., Wacker, L., Prévôt, A. S. H., Baltensperger, U., and Szidat, S.: On the isolation of OC and EC and the optimal strategy of radiocarbon-based source apportionment of carbonaceous aerosols, \*Atmos. Chem. Phys.\*, 12, 10841-10856, <https://doi.org/10.5194/acp-12-10841-2012>, 2012.](https://doi.org/10.5194/acp-12-10841-2012)
- Zhang, Y. L., Zotter, P., Perron, N., Prévôt, A. S. H., Wacker, L., and Szidat, S.: Fossil and non-fossil sources of different carbonaceous fractions in fine and coarse particles by radiocarbon measurement, *Radiocarbon*, 55, 1510-1520, 2013.
- 20 Zhang, Y. L., Li, J., Zhang, G., Zotter, P., Huang, R.-J., Tang, J.-H., Wacker, L., Prévôt, A. S. H., and Szidat, S.: Radiocarbon-based source apportionment of carbonaceous aerosols at a regional background site on Hainan Island, South China, *Environ. Sci. Technol.*, 48, 2651–2659, 10.1021/es4050852, 2014.
- Zhang, Y. L., Huang, R. J., El Haddad, I., Ho, K. F., Cao, J. J., Han, Y., Zotter, P., Bozzetti, C., Daellenbach, K. R., Canonaco, F., Slowik, J. G., Salazar, G., Schwikowski, M., Schnelle-Kreis, J., Abbaszade, G., Zimmermann, R., Baltensperger, U., Prévôt, A. S. H., and Szidat, S.: Fossil vs. non-fossil sources of fine carbonaceous aerosols in four Chinese cities during the extreme winter haze episode of 2013, *Atmos. Chem. Phys.*, 15, 1299-1312, <https://doi.org/10.5194/acp-15-1299-2015>, 2015a.
- 25 Zhang, Y. L., Schnelle-Kreis, J., Abbaszade, G., Zimmermann, R., Zotter, P., Shen, R. R., Schäfer, K., Shao, L., Prévôt, A. , and Szidat, S.: Source apportionment of elemental carbon in Beijing, China: insights from radiocarbon and organic marker measurements, *Environ. Sci. Technol.*, 49, 8408–8415, 2015b.
- Zhang, Y. L., Ren, H., Sun, Y., Cao, F., Chang, Y., Liu, S., Lee, X., Agrios, K., Kawamura, K., Liu, D., Ren, L., Du, W., Wang, Z., Prévôt, A. S. H., Szidat, S., and Fu, P.: High contribution of nonfossil sources to submicrometer organic aerosols in Beijing, China, *Environ. Sci. Technol.*, 51, 7842–7852, 2017.
- 30 Zhang, Y.-L., El-Haddad, I., Huang, R.-J., Ho, K.-F., Cao, J.-J., Han, Y., Zotter, P., Bozzetti, C., Daellenbach, K. R., Slowik, J. G., Salazar, G., Prévôt, A. S. H., and Szidat, S.: Large contribution of fossil fuel derived secondary organic carbon to water soluble organic aerosols in winter haze in China, *Atmos. Chem. Phys.*, 18, 4005-4017, <https://doi.org/10.5194/acp-18-4005-2018>, 2018.
- Zhao, Z., Cao, J., Zhang, T., Shen, Z., Ni, H., Tian, J., Wang, Q., Liu, S., Zhou, J., Gu, J., and Shen, G.: Stable carbon isotopes and levoglucosan for PM<sub>2.5</sub> elemental carbon source apportionments in the largest city of Northwest China, *Atmos. Environ.*, 185, 253-261, <https://doi.org/10.1016/j.atmosenv.2018.05.008>, 2018.
- 40

Zhou, Y., Xing, X., Lang, J., Chen, D., Cheng, S., Wei, L., Wei, X., and Liu, C.: A comprehensive biomass burning emission inventory with high spatial and temporal resolution in China, *Atmos. Chem. Phys.*, 17, 2839-2864, <https://doi.org/10.5194/acp-17-2839-2017>, 2017.

- 5 Zhu, C. S., Cao, J. J., Tsai, C. J., Zhang, Z. S., and Tao, J.: Biomass burning tracers in rural and urban ultrafine particles in Xi'an, China, *Atmos. Pollut. Res.*, 8, 614–618, <http://dx.doi.org/10.1016/j.apr.2016.12.011>, 2017.

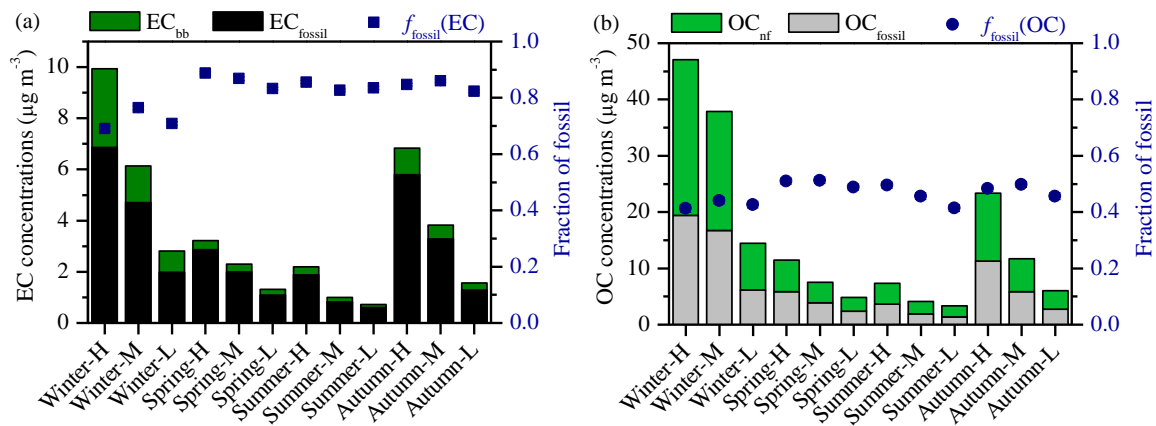

**Figure 1.** (a) Mass concentrations of EC from fossil and non-fossil sources ( $\text{EC}_{\text{fossil}}$  and  $\text{EC}_{\text{bb}}$ , respectively), and fraction of fossil in EC ( $f_{\text{fossil}}(\text{EC})$ ). (b) Mass concentrations of OC from fossil and non-fossil sources ( $\text{OC}_{\text{fossil}}$  and  $\text{OC}_{\text{nf}}$ , respectively), and fraction of fossil in OC

5 ( $f_{\text{fossil}}(\text{OC})$ ).

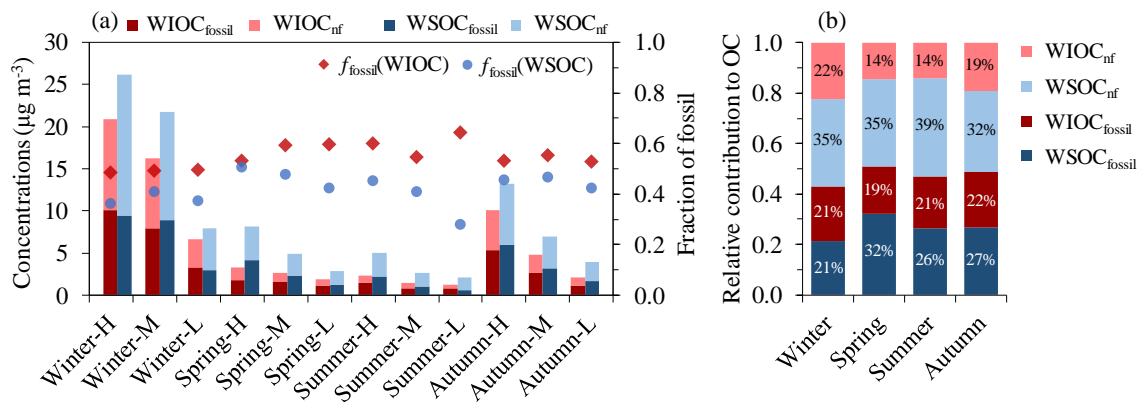

**Figure 2.** (a) Mass concentrations of WIOC and WSOC from fossil and non-fossil sources (WIOC<sub>fossil</sub>, WIOC<sub>nf</sub>, WSOC<sub>fossil</sub> and WSOC<sub>nf</sub>) as well as fraction of fossil in WIOC and WSOC ( $f_{\text{fossil}}(\text{WIOC})$  and  $f_{\text{fossil}}(\text{WSOC})$ , respectively). (b) Averaged relative contribution to OC (%) from WIOC<sub>nf</sub>, WSOC<sub>nf</sub>, WIOC<sub>fossil</sub>, and WSOC<sub>fossil</sub> in each season.

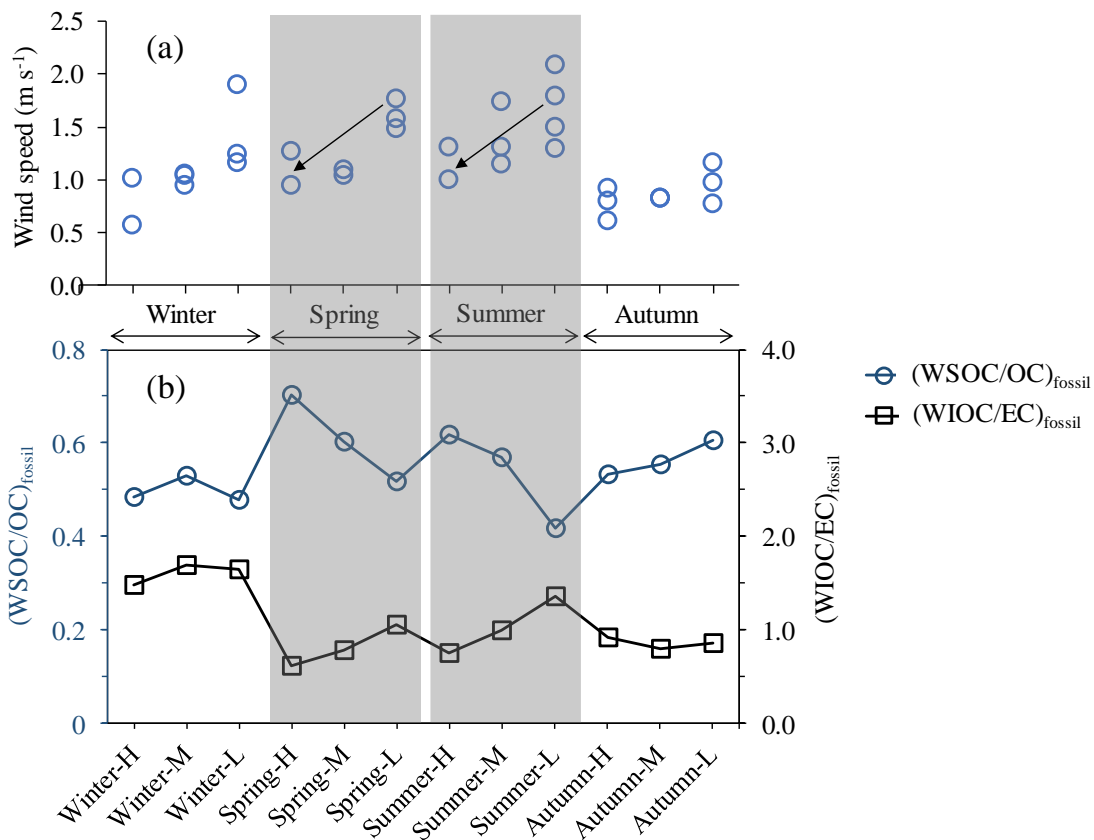

**Figure 3.** (a) Wind speed for each composite sample. Each composite sample consists of 2–4 24h filter samples, and each filter sample is shown as individual datapoint. The wind speed is recorded by the Meteorological Institute of Shaanxi Province, Xi'an, China. (b) The fraction of fossil WSOC in fossil OC ( $(\text{WSOC/OC})_{\text{fossil}}$ , dark blue circle), the fossil WIOC to fossil EC ratio ( $(\text{WIOC/EC})_{\text{fossil}}$ , black square)

5 over all the selected samples throughout the year.

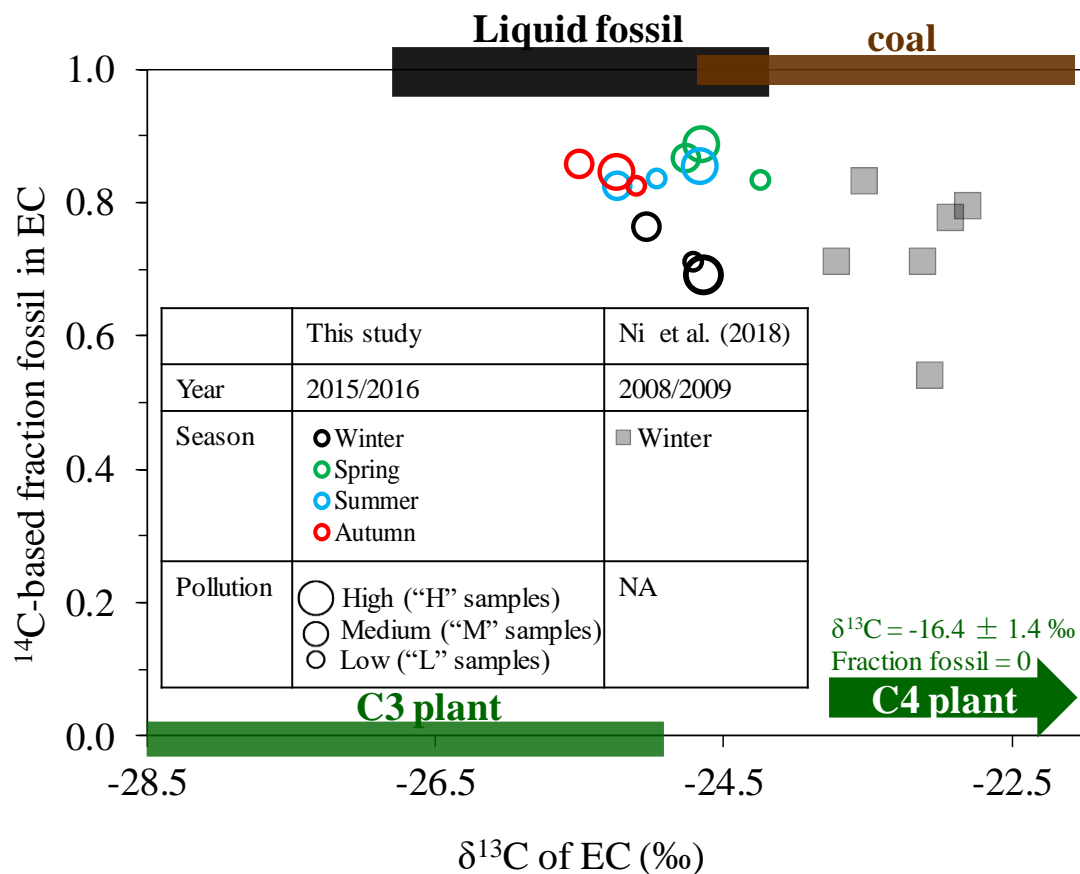

5 **Figure 4.** The  $^{14}\text{C}$ -based fraction fossil versus  $\delta^{13}\text{C}$  for EC in Xi'an, China in different seasons in 2015/2016 (this study, circle symbols), compared with those in winter 2008/2009 from Ni et al. (2018) (square symbols). The size of the symbols for the year 2015/2016 (this study) represents the pollution conditions (high, medium and low) for each sample. The expected  $^{14}\text{C}$  and  $\delta^{13}\text{C}$  endmember ranges for emissions from C3 plant burning, liquid fossil fuel burning and coal burning are shown as green, black and brown bars, respectively. The  $\delta^{13}\text{C}$  signatures are indicated as mean  $\pm$  SD (Sect. 2.6). The  $\delta^{13}\text{C}$  signatures of corn stalk (i.e., C4 plant) burning is  $-16.4 \pm 1.4$  ‰ is also indicated.

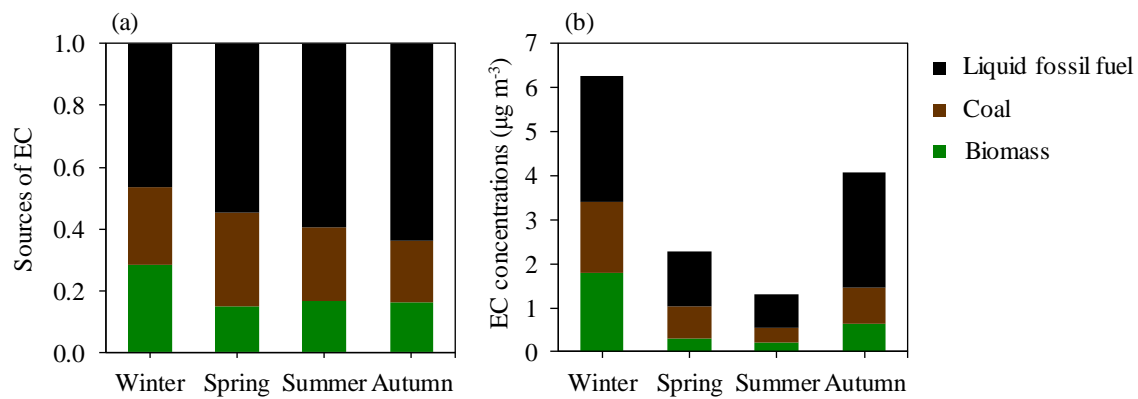

**Figure 5.** (a) Fractional contributions of 3 incomplete combustion sources to EC in different seasons. (b) Mass concentration of EC ( $\mu\text{g m}^{-3}$ ) from each combustion source. The data are presented in Tables [S8-S7](#) and [S9-S8](#).



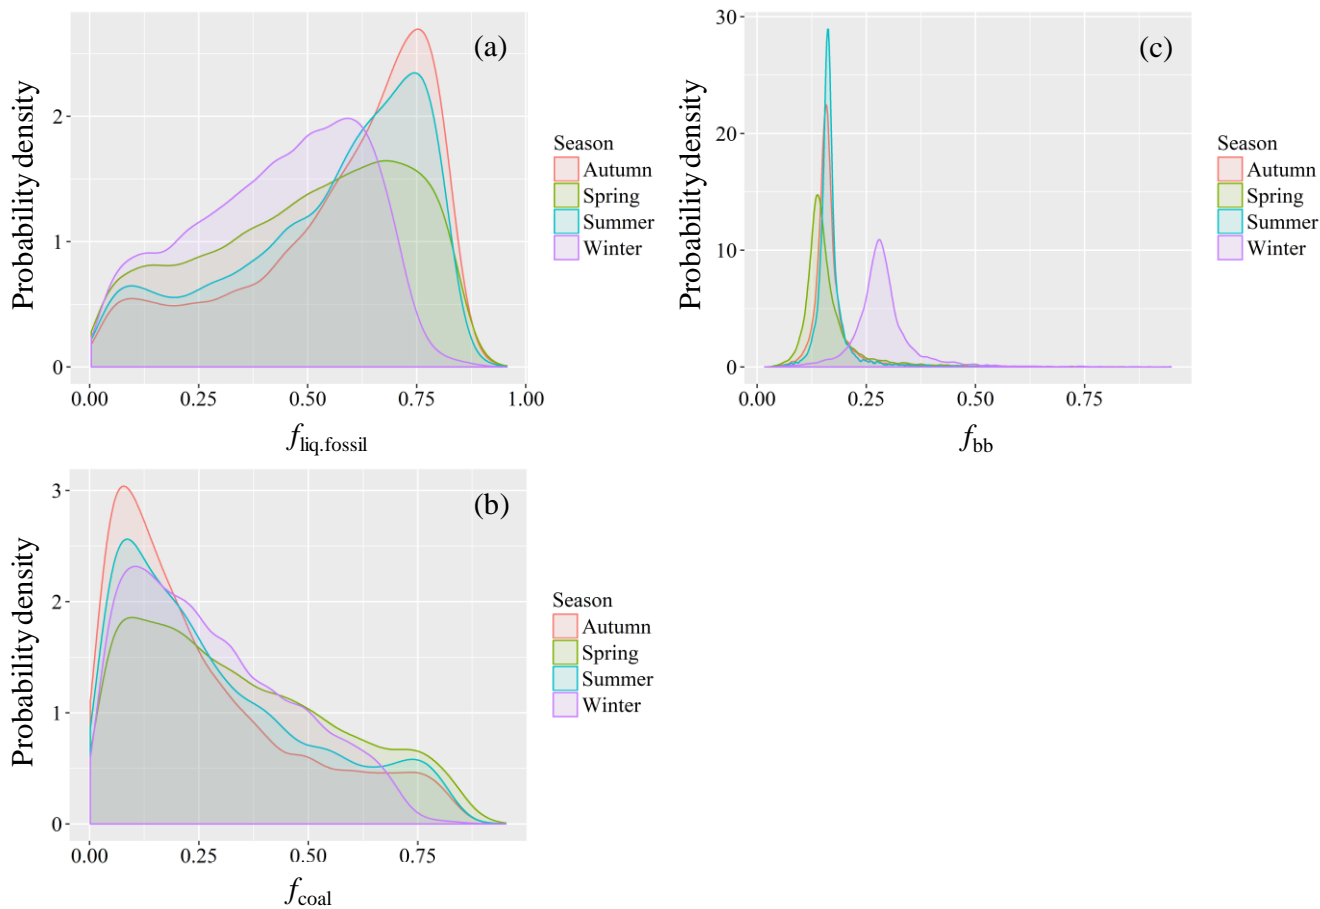

**Figure 6.** Probability density functions (PDFs) of the relative source contributions of (a) liquid fossil fuel combustion ( $f_{\text{liq.fossil}}$ ), (b) coal combustion ( $f_{\text{coal}}$ ) and (c) biomass burning ( $f_{\text{bb}}$ ) to EC constrained by combining radiocarbon and  $\delta^{13}\text{C}$  measurements, calculated using the Bayesian Markov chain Monte Carlo approach. For details, see Sect. 2.6.

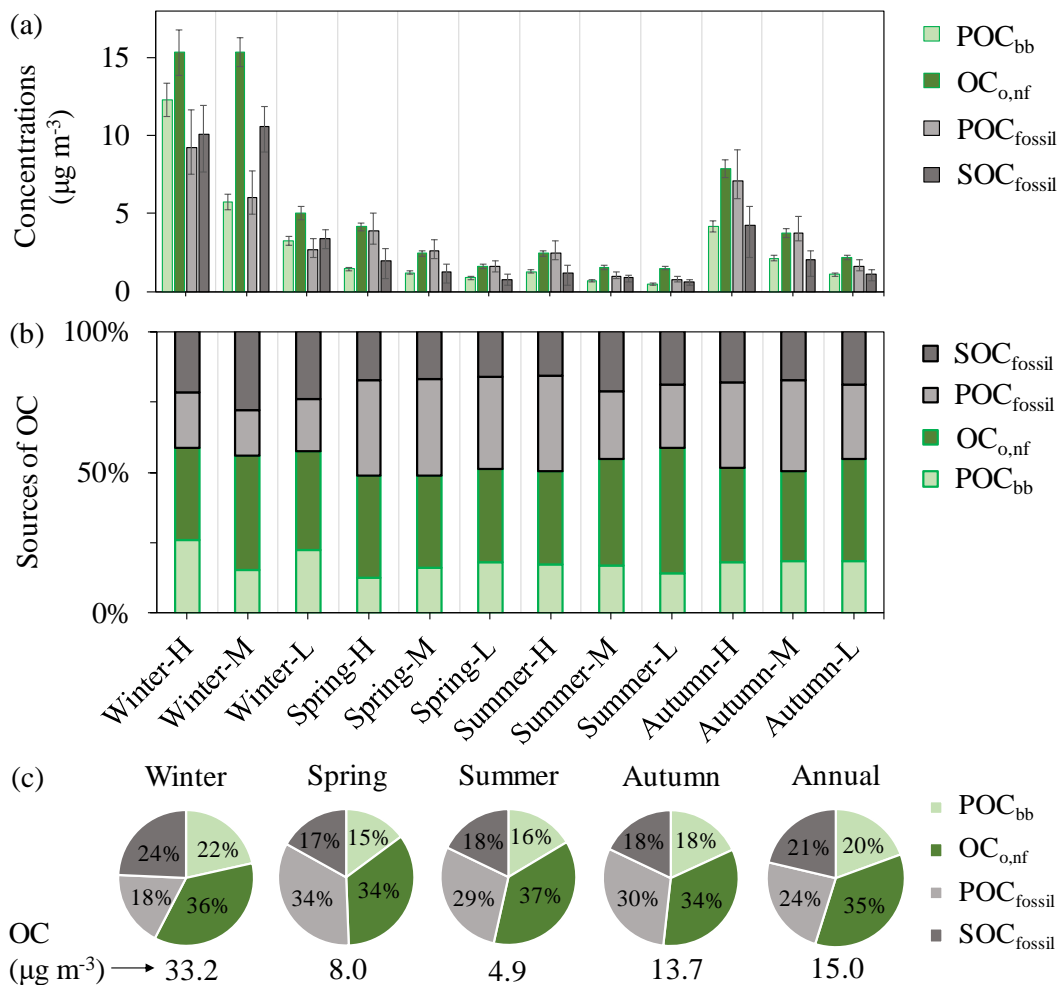

**Figure 67.** (a) The estimated mass concentrations of POC<sub>bb</sub>, OC<sub>o,nf</sub>, POC<sub>fossil</sub>, SOC<sub>fossil</sub> ( $\mu\text{g m}^{-3}$ ) in total OC of PM<sub>2.5</sub> samples. The error bars indicate the interquartile range (25th–75th percentile) of the median values. (b) The percentage of POC<sub>bb</sub>, OC<sub>o,nf</sub>, POC<sub>fossil</sub>, SOC<sub>fossil</sub> in total OC. (c) Average source apportionment results of OC in each season and over the year. The numbers below the pie charts represent the seasonally/annually averaged OC concentrations.

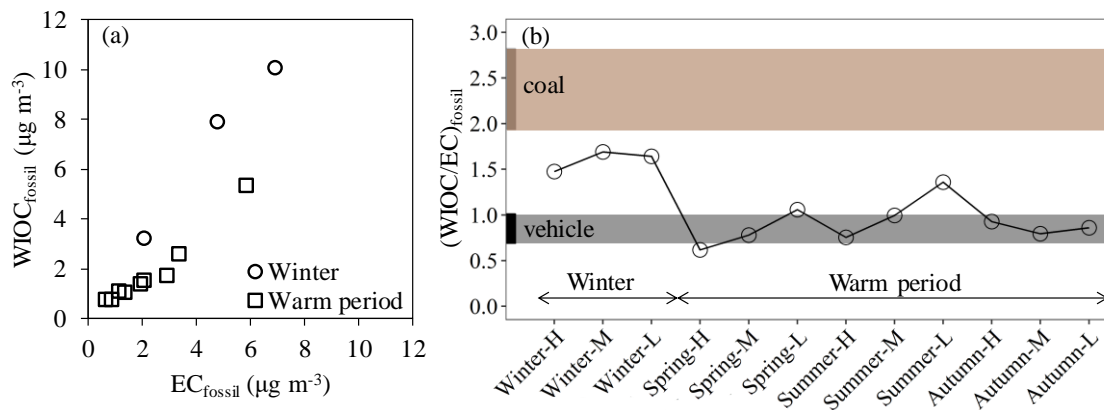

**Figure 78.** (a) A scatter plot of EC concentrations from fossil sources ( $EC_{\text{fossil}}$ ) versus WIOC concentrations from fossil sources ( $WIOC_{\text{fossil}}$ ) in winter (circle) and warm period (square). (b) The WIOC to EC ratio from fossil sources ( $(WIOC/EC)_{\text{fossil}}$ ) over all the selected samples throughout the year. The dashed areas indicate typical primary OC/EC ratios for coal combustion (brown) and vehicle emissions (black).

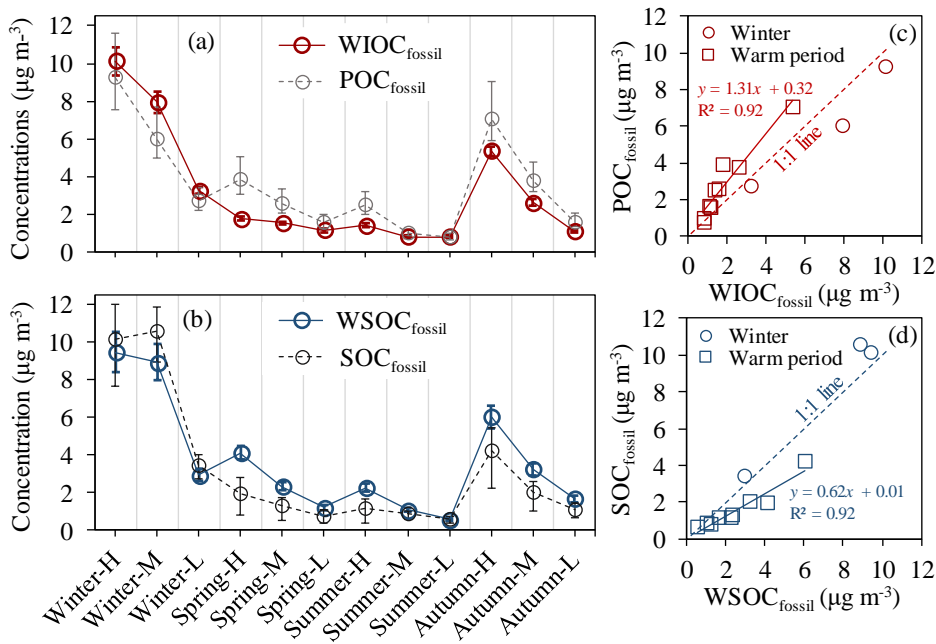

**Figure 89.** (a) Concentrations of WIOC and POC from fossil sources (WIOC<sub>fossil</sub> and POC<sub>fossil</sub>, respectively). Panel a has the same x axis with panel b. (b) Concentrations of WSOC and SOC from fossil sources (WSOC<sub>fossil</sub> and SOC<sub>fossil</sub>, respectively). (c) A scatter plot of WIOC<sub>fossil</sub> concentrations versus POC<sub>fossil</sub> concentrations. (d) A scatter plot of WSOC<sub>fossil</sub> concentrations versus SOC<sub>fossil</sub> concentrations.

5 The interquartile range (25th-75th percentile) of the median POC<sub>fossil</sub> and SOC<sub>fossil</sub> is shown by grey vertical bars in panel a and black vertical bars in panel b.

**Table 1.** Relative contributions of non-fossil sources to EC, OC, WIOC and WSOC ( $f_{bb}(EC)$ ,  $f_{nf}(OC)$ ,  $f_{nf}(WIOC)$ ,  $f_{nf}(WSOC)$ ), and relative fossil sources contribution to EC, OC, WIOC and WSOC ( $f_{fossil}(EC)$ ,  $f_{fossil}(OC)$ ,  $f_{fossil}(WIOC)$ ,  $f_{fossil}(WSOC)$ ) for each sample.

| Sample name | $f_{bb}(EC)$         | $f_{fossil}(EC)$     | $f_{nf}(OC)$         | $f_{fossil}(OC)$     | $f_{nf}(WIOC)$       | $f_{fossil}(WIOC)$   | $f_{nf}(WSOC)$       | $f_{fossil}(WSOC)$   |
|-------------|----------------------|----------------------|----------------------|----------------------|----------------------|----------------------|----------------------|----------------------|
| Winter-H    | <u>0.310 ± 0.008</u> | <u>0.690 ± 0.008</u> | <u>0.587 ± 0.014</u> | <u>0.413 ± 0.014</u> | <u>0.516 ± 0.012</u> | <u>0.484 ± 0.012</u> | <u>0.639 ± 0.014</u> | <u>0.361 ± 0.014</u> |
| Winter-M    | <u>0.235 ± 0.006</u> | <u>0.765 ± 0.006</u> | <u>0.559 ± 0.012</u> | <u>0.441 ± 0.012</u> | <u>0.509 ± 0.012</u> | <u>0.491 ± 0.012</u> | <u>0.590 ± 0.012</u> | <u>0.410 ± 0.012</u> |
| Winter-L    | <u>0.291 ± 0.007</u> | <u>0.709 ± 0.007</u> | <u>0.574 ± 0.012</u> | <u>0.426 ± 0.012</u> | <u>0.504 ± 0.011</u> | <u>0.496 ± 0.011</u> | <u>0.627 ± 0.013</u> | <u>0.373 ± 0.013</u> |
| Spring-H    | <u>0.112 ± 0.004</u> | <u>0.888 ± 0.004</u> | <u>0.490 ± 0.011</u> | <u>0.510 ± 0.011</u> | <u>0.468 ± 0.011</u> | <u>0.532 ± 0.011</u> | <u>0.495 ± 0.010</u> | <u>0.505 ± 0.010</u> |
| Spring-M    | <u>0.132 ± 0.006</u> | <u>0.868 ± 0.006</u> | <u>0.487 ± 0.011</u> | <u>0.513 ± 0.011</u> | <u>0.410 ± 0.010</u> | <u>0.590 ± 0.010</u> | <u>0.525 ± 0.011</u> | <u>0.475 ± 0.011</u> |
| Spring-L    | <u>0.167 ± 0.005</u> | <u>0.833 ± 0.005</u> | <u>0.511 ± 0.011</u> | <u>0.489 ± 0.011</u> | <u>0.406 ± 0.010</u> | <u>0.594 ± 0.010</u> | <u>0.578 ± 0.014</u> | <u>0.422 ± 0.014</u> |
| Summer-H    | <u>0.144 ± 0.005</u> | <u>0.856 ± 0.005</u> | <u>0.504 ± 0.011</u> | <u>0.496 ± 0.011</u> | <u>0.399 ± 0.009</u> | <u>0.601 ± 0.009</u> | <u>0.550 ± 0.012</u> | <u>0.450 ± 0.012</u> |
| Summer-M    | <u>0.173 ± 0.005</u> | <u>0.827 ± 0.005</u> | <u>0.544 ± 0.012</u> | <u>0.456 ± 0.012</u> | <u>0.454 ± 0.010</u> | <u>0.546 ± 0.010</u> | <u>0.591 ± 0.013</u> | <u>0.409 ± 0.013</u> |
| Summer-L    | <u>0.165 ± 0.006</u> | <u>0.835 ± 0.006</u> | <u>0.585 ± 0.012</u> | <u>0.415 ± 0.012</u> | <u>0.359 ± 0.009</u> | <u>0.641 ± 0.009</u> | <u>0.720 ± 0.019</u> | <u>0.280 ± 0.019</u> |
| Autumn-H    | <u>0.153 ± 0.005</u> | <u>0.847 ± 0.005</u> | <u>0.516 ± 0.011</u> | <u>0.484 ± 0.011</u> | <u>0.470 ± 0.011</u> | <u>0.530 ± 0.011</u> | <u>0.545 ± 0.011</u> | <u>0.455 ± 0.011</u> |
| Autumn-M    | <u>0.140 ± 0.004</u> | <u>0.860 ± 0.004</u> | <u>0.502 ± 0.011</u> | <u>0.498 ± 0.011</u> | <u>0.448 ± 0.010</u> | <u>0.552 ± 0.010</u> | <u>0.534 ± 0.011</u> | <u>0.466 ± 0.011</u> |
| Autumn-L    | <u>0.177 ± 0.005</u> | <u>0.823 ± 0.005</u> | <u>0.544 ± 0.012</u> | <u>0.456 ± 0.012</u> | <u>0.472 ± 0.011</u> | <u>0.528 ± 0.011</u> | <u>0.578 ± 0.012</u> | <u>0.422 ± 0.012</u> |

1 *Supplement of*

2 **Sources and formation of carbonaceous aerosols in Xi'an,**  
3 **China: primary emissions and secondary formation**  
4 **constrained by radiocarbon**

5 Haiyan Ni<sup>1,2,3</sup>, Ru-Jin Huang<sup>1\*</sup>, Junji Cao<sup>1</sup>, Jie Guo<sup>1</sup>, Haoyue Deng<sup>2</sup>, Ulrike Dusek<sup>2</sup>

6 <sup>1</sup>State Key Laboratory of Loess and Quaternary Geology, Key Laboratory of Aerosol Chemistry and Physics,  
7 Center for Excellence in Quaternary Science and Global Change, Institute of Earth Environment, Chinese  
8 Academy of Sciences, Xi'an, 710061, China

9 <sup>2</sup>Centre for Isotope Research (CIO), Energy and Sustainability Research Institute Groningen (ESRIG),  
10 University of Groningen, Groningen, 9747 AG, the Netherlands

11 <sup>3</sup>University of Chinese Academy of Sciences, Beijing, 100049, China

12 *Correspondence to:* rujin.huang@ieecas.cn

13 **S1. Sensitivity study for potential pyrolysis effects on  $\delta^{13}\text{C}_{\text{EC}}$**

14 In this study, we used a two-step method (OC step: 375 °C for 3 h; EC step: 850 °C for 5 h) to  
15 isolate OC and EC for  $\delta^{13}\text{C}$  analysis, as described in Sect. 2.3. Our earlier study in Xi'an found that  
16 EC recovery for  $\delta^{13}\text{C}$  analysis (relative to EC quantified by the thermal-optical reflectance protocol  
17 IMPROVE A; Chow et al., 2007) was on average  $123 \pm 8\%$ , higher than 100% (Zhao et al., 2018).  
18 The reason is that pyrolyzed OC (formed through charring during the OC removal procedure) and  
19 possibly some remaining OC compounds (e.g., high molecular weight refractory carbon) can be  
20 released at the high temperature of EC step.

21 The resulted  $\delta^{13}\text{C}$  of EC could be biased by  $\delta^{13}\text{C}$  of pyrolyzed OC, if the contribution from  
22 pyrolyzed OC to the isolated EC is high and  $\delta^{13}\text{C}$  of pyrolyzed OC is very different from  $\delta^{13}\text{C}$  of  
23 pure EC. To examine the effect of pyrolyzed OC on  $\delta^{13}\text{C}$  of EC, a sensitivity analysis is performed.  
24  $\delta^{13}\text{C}$  of pyrolyzed OC is not known, but our recent studies suggest that  $\delta^{13}\text{C}$  of pyrolyzed OC is not  
25 very different from  $\delta^{13}\text{C}_{\text{OC}}$  ( $<1\%$  in many cases). We thus use  $\delta^{13}\text{C}_{\text{OC}}$  to represent  $\delta^{13}\text{C}$  of pyrolyzed  
26 OC.  $\delta^{13}\text{C}$  of pure EC is calculated based on isotope mass balance. This analysis shows that for high  
27 contribution from pyrolyzed OC to the isolated EC of 20%, the expected difference in  $\delta^{13}\text{C}$  between  
28 measured EC and true EC is still  $<1\%$ . This will not significantly change any conclusions made in  
29 this study.

30 **S1S2. Estimation of the probability density functions (PDFs) of  $p$  values**

31 The  $p$  values used in Eq. (11) in the main text is the fraction of EC from coal combustion ( $EC_{\text{coal}}$ )  
32 in EC from fossil sources ( $EC_{\text{fossil}}$ ). That is,

33 
$$p = \frac{EC_{\text{coal}}}{EC_{\text{fossil}}} = \frac{EC_{\text{coal}}}{EC_{\text{coal}} + EC_{\text{liq.fossil}}} \quad (\text{S1})$$

34 where  $EC_{\text{fossil}}$  is the sum of  $EC_{\text{coal}}$  and EC from liquid fossil fuel combustion (i.e., vehicle emissions;  
35  $EC_{\text{liq.fossil}}$ ).

36 Eq. (S1) can be formulated as:

37 
$$p = \frac{f_{\text{coal}}}{f_{\text{fossil}}} = \frac{f_{\text{coal}}}{f_{\text{coal}} + f_{\text{liq.fossil}}} \quad (\text{S2})$$

38 where  $f_{\text{coal}}$  and  $f_{\text{liq.fossil}}$  is the relative contribution of coal combustion emission and liquid fossil fuel  
39 combustion to EC. The sum of  $f_{\text{coal}}$  and  $f_{\text{liq.fossil}}$  is  $f_{\text{fossil}}$  of EC, which is well constrained by  $F^{14}\text{C}$  of  
40 EC.

41 The PDFs of  $f_{\text{coal}}$  and  $f_{\text{liq.fossil}}$  (eg., Fig. S46 in the main text), derived from the Bayesian calculations  
42 detailed in Sect. 2.6 in the main text, are used to calculated the PDFs of  $p$ .



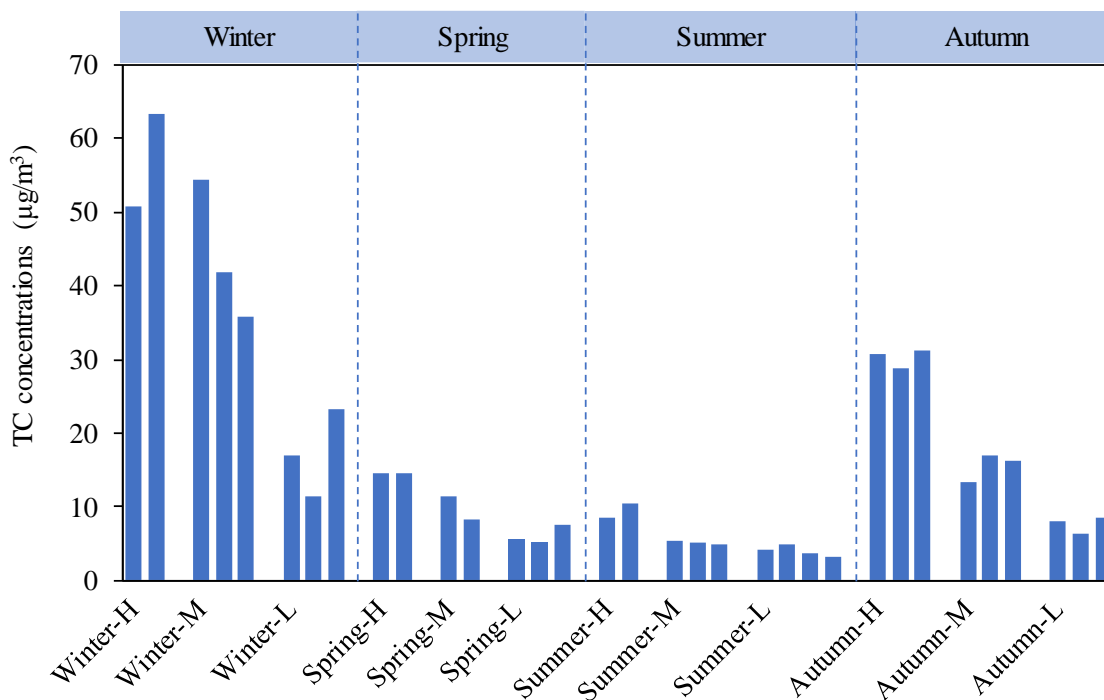

43

44

45

46

47

**Figure S1.** Selected samples for  $^{14}\text{C}$  analysis. Three composite samples that represent high (H), medium (M) and low (L) TC concentrations are combined from several individual filter samples per season. Each composite sample is consisting of 2 to 4 24-hr filter pieces with similar TC loadings and air mass backward trajectories (Table S1).

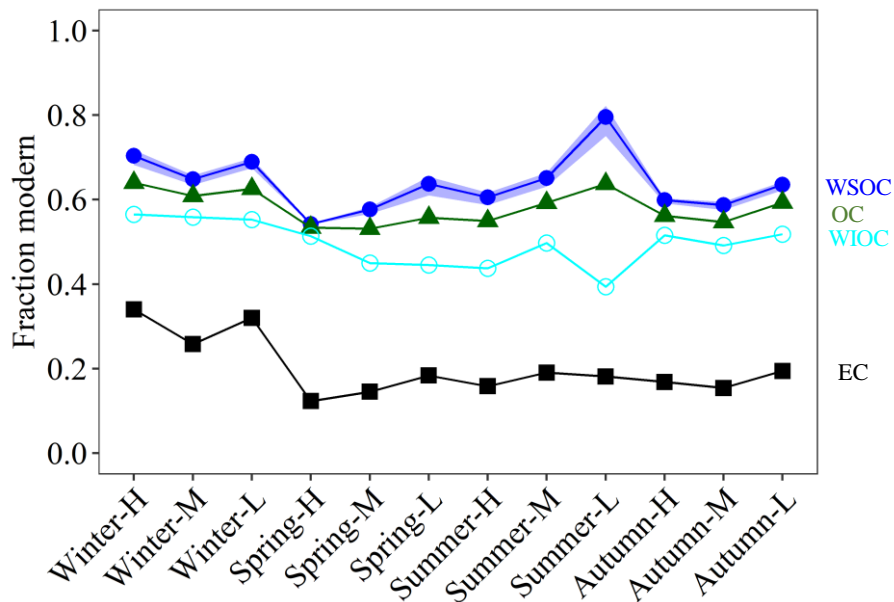

48

49 **Figure S2.** Fraction modern ( $F^{14}C$ ) of elemental carbon (EC), organic carbon (OC), water-insoluble  
 50 OC (WIOC) and water-soluble OC (WSOC) ( $F^{14}C_{(EC)}$ ,  $F^{14}C_{(OC)}$ ,  $F^{14}C_{(WIOC)}$  and  $F^{14}C_{(WSOC)}$   
 51 respectively).  $F^{14}C_{(WSOC)}$  is calculated from the measured  $F^{14}C_{(OC)}$  and  $F^{14}C_{(WIOC)}$  following the  
 52 isotope mass balance. The blue dashed area for best estimate of  $F^{14}C_{(WSOC)}$  (blue filled circle)  
 53 indicates ranges of  $F^{14}C_{(WSOC)}$  (Sect. 2.5).

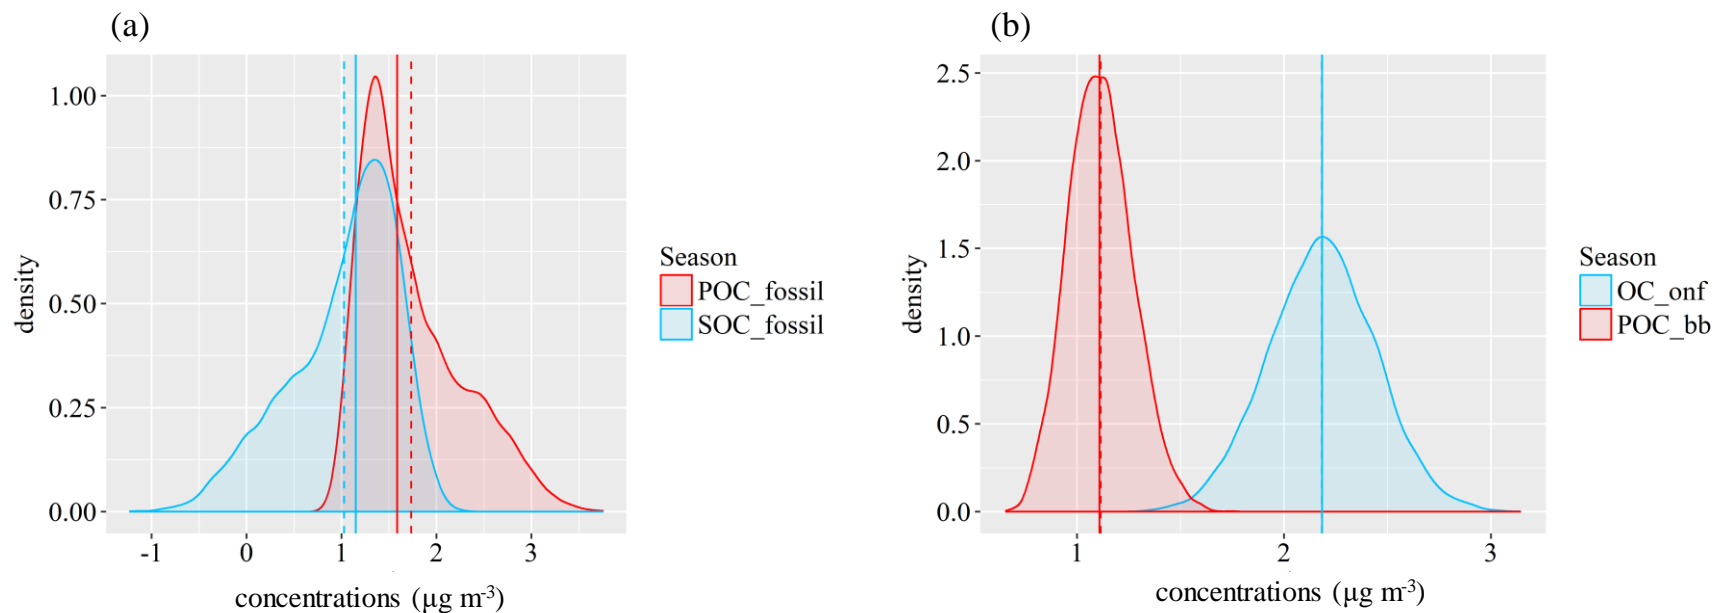

54

55 **Figure S3.** (a) An example probability density functions (PDFs) of concentrations of POC<sub>fossil</sub> (red), SOC<sub>fossil</sub> (light blue) for sample Autumn-L. (b)  
 56 PDFs of concentrations of and OC<sub>onf</sub> (light blue) and POC<sub>bb</sub> (red) for the same sample. Their concentrations are estimated by <sup>14</sup>C-apportioned  
 57 OC and EC using the EC tracer method (Sect. 2.5). The mean and median are indicated by the dashed and solid vertical lines.

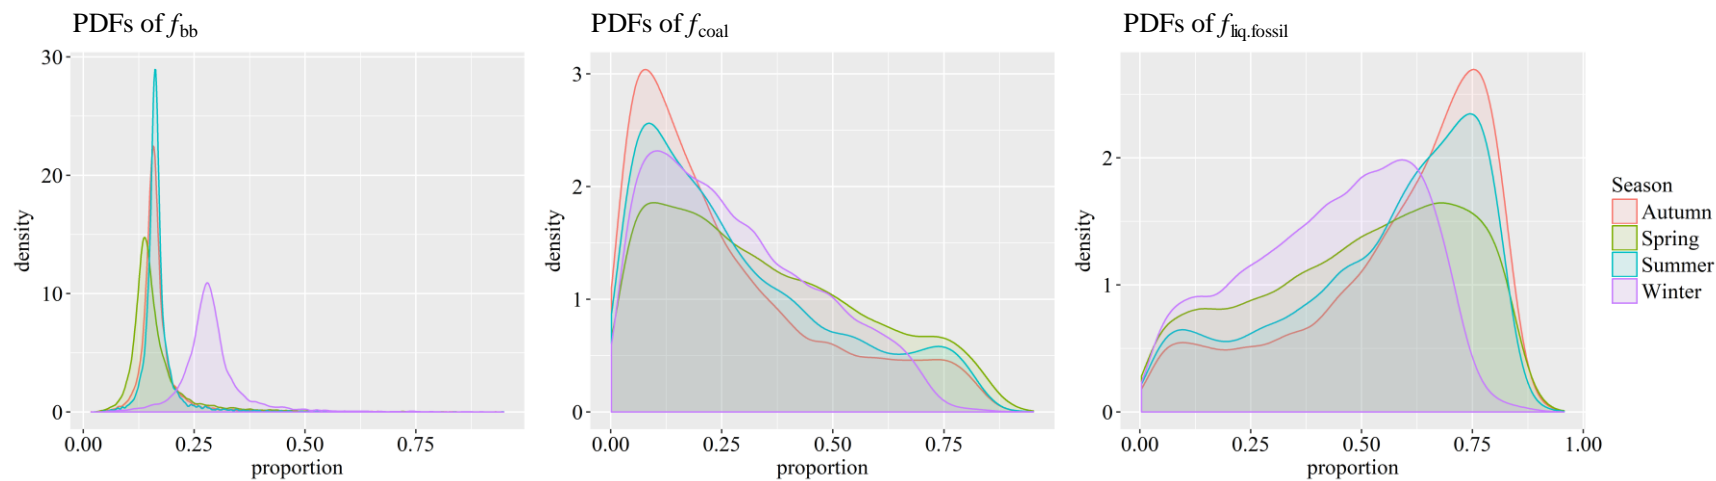

58

59 **Figure S4.** Probability density functions (PDFs) of the relative source contributions of biomass burning ( $f_{bb}$ ), coal combustion ( $f_{coal}$ ) and liquid fossil  
 60 fuel combustion ( $f_{liq.fossil}$ ) to EC constrained by combining radiocarbon and  $\delta^{13}C$  measurements, calculated using the Bayesian Markov chain Monte  
 61 Carlo approach (Sect. 2.6).

62 **Table S1.** Sample information as well as the fraction modern ( $F^{14}C$ ) of elemental carbon (EC),  
63 organic carbon (OC), water-insoluble OC (WIOC) and water-soluble OC (WSOC) ( $F^{14}C_{(EC)}$ ,  
64  $F^{14}C_{(OC)}$ ,  $F^{14}C_{(WIOC)}$  and  $F^{14}C_{(WSOC)}$  respectively), and stable carbon isotopic compositions ( $\delta^{13}C$ , ‰)  
65 of EC ( $\delta^{13}C_{EC}$ ).

| Sample name | Sampling Date<br>(month/day/year) | $F^{14}C_{(EC)}^a$ | $F^{14}C_{(OC)}^a$ | $F^{14}C_{(WIOC)}^a$ | $F^{14}C_{(WSOC)}^b$ | $\delta^{13}C_{EC}$ |
|-------------|-----------------------------------|--------------------|--------------------|----------------------|----------------------|---------------------|
| Winter-H    | 12/20/2015                        | 0.340 ± 0.005      | 0.640 ± 0.009      | 0.565 ± 0.006        | 0.704                | -24.64 ± 0.02       |
|             | 12/21/2015                        |                    |                    |                      | (0.682–0.717)        |                     |
| Winter-M    | 11/30/2015                        | 0.258 ± 0.005      | 0.609 ± 0.007      | 0.558 ± 0.007        | 0.649                | -25.04 ± 0.04       |
|             | 12/8/2015                         |                    |                    |                      | (0.635–0.657)        |                     |
|             | 12/9/2015                         |                    |                    |                      |                      |                     |
| Winter-L    | 12/14/2015                        | 0.320 ± 0.005      | 0.626 ± 0.007      | 0.553 ± 0.006        | 0.69                 | -24.71 ± 0.02       |
|             | 12/16/2015                        |                    |                    |                      | (0.675–0.699)        |                     |
|             | 12/17/2015                        |                    |                    |                      |                      |                     |
| Spring-H    | 5/5/2016                          | 0.123 ± 0.004      | 0.534 ± 0.006      | 0.514 ± 0.006        | 0.543                | -24.66 ± 0.04       |
|             | 5/10/2016                         |                    |                    |                      | (0.541–0.543)        |                     |
| Spring-M    | 4/19/2016                         | 0.145 ± 0.006      | 0.531 ± 0.007      | 0.450 ± 0.006        | 0.577                | -24.77 ± 0.02       |
|             | 4/20/2016                         |                    |                    |                      | (0.567–0.583)        |                     |
| Spring-L    | 4/23/2016                         | 0.184 ± 0.004      | 0.557 ± 0.007      | 0.445 ± 0.006        | 0.637                | -24.24 ± 0.02       |
|             | 4/24/2016                         |                    |                    |                      | (0.610–0.654)        |                     |
|             | 4/27/2016                         |                    |                    |                      |                      |                     |
| Summer-H    | 7/21/2016                         | 0.159 ± 0.004      | 0.549 ± 0.006      | 0.438 ± 0.006        | 0.605                | -24.67 ± 0.02       |
|             | 7/23/2016                         |                    |                    |                      | (0.587–0.616)        |                     |
| Summer-M    | 7/11/2016                         | 0.191 ± 0.004      | 0.593 ± 0.007      | 0.497 ± 0.006        | 0.651                | -25.25 ± 0.09       |
|             | 7/16/2016                         |                    |                    |                      | (0.631–0.663)        |                     |
|             | 7/27/2016                         |                    |                    |                      |                      |                     |
| Summer-L    | 7/5/2016                          | 0.181 ± 0.006      | 0.637 ± 0.007      | 0.394 ± 0.006        | 0.795                | -24.96 ± 0.02       |
|             | 7/6/2016                          |                    |                    |                      | (0.750–0.822)        |                     |
|             | 7/12/2016                         |                    |                    |                      |                      |                     |
|             | 7/13/2016                         |                    |                    |                      |                      |                     |
| Autumn-H    | 11/3/2016                         | 0.169 ± 0.004      | 0.562 ± 0.007      | 0.516 ± 0.007        | 0.599                | -25.24 ± 0.04       |
|             | 11/4/2016                         |                    |                    |                      | (0.591–0.603)        |                     |
|             | 11/13/2016                        |                    |                    |                      |                      |                     |
| Autumn-M    | 10/17/2016                        | 0.154 ± 0.004      | 0.547 ± 0.007      | 0.492 ± 0.006        | 0.587                | -25.51 ± 0.03       |
|             | 10/18/2016                        |                    |                    |                      | (0.575–0.595)        |                     |
|             | 11/1/2016                         |                    |                    |                      |                      |                     |
| Autumn-L    | 10/15/2016                        | 0.194 ± 0.004      | 0.593 ± 0.006      | 0.518 ± 0.006        | 0.635                | -25.10 ± 0.02       |
|             | 10/16/2016                        |                    |                    |                      | (0.623–0.643)        |                     |
|             | 10/20/2016                        |                    |                    |                      |                      |                     |

66 <sup>a</sup>  $F^{14}C$  values are given in average ± measurement uncertainty.

67 <sup>b</sup>  $F^{14}C_{(WSOC)}$  is calculated from the measured  $F^{14}C_{(OC)}$  and  $F^{14}C_{(WIOC)}$  following the isotope mass balance (Eq.  
68 4 in the main text). The range of  $F^{14}C_{(WSOC)}$  is presented in the parentheses, calculated following the method  
69 detailed in Sect 2.5.

70 **Table S2.** Consensus value of F<sup>14</sup>C secondary standards IAEA- C7 and -C8 along with measured  
71 F<sup>14</sup>C values. Data corrections for the measured F14C of secondary standards are the same as those  
72 for samples.

| Standards | Consensus value of F <sup>14</sup> C | measured F <sup>14</sup> C | measured mass (µgC) |
|-----------|--------------------------------------|----------------------------|---------------------|
| IAEA-C7   | 0.4953 ± 0.0012                      | 0.4884 ± 0.0059            | 76                  |
|           |                                      | 0.5017 ± 0.0064            | 80                  |
| IAEA-C8   | 0.1503 ± 0.0017                      | 0.1511 ± 0.0039            | 63                  |
|           |                                      | 0.1540 ± 0.0038            | 100                 |

73

74 **Table S3.** Relative contributions of non fossil sources to EC, OC, WIOC and WSOC ( $f_{bb}(EC), f_{nf}(OC), f_{nf}(WIOC), f_{nf}(WSOC)$ ), and relative fossil  
 75 sources contribution to EC, OC, WIOC and WSOC ( $f_{fossil}(EC), f_{fossil}(OC), f_{fossil}(WIOC), f_{fossil}(WSOC)$ ) for each sample.

| Sample-name | $f_{bb}(EC)$      | $f_{fossil}(EC)$  | $f_{nf}(OC)$      | $f_{fossil}(OC)$  | $f_{nf}(WIOC)$    | $f_{fossil}(WIOC)$ | $f_{nf}(WSOC)$    | $f_{fossil}(WSOC)$ |
|-------------|-------------------|-------------------|-------------------|-------------------|-------------------|--------------------|-------------------|--------------------|
| Winter-H    | $0.310 \pm 0.008$ | $0.690 \pm 0.008$ | $0.587 \pm 0.014$ | $0.413 \pm 0.014$ | $0.516 \pm 0.012$ | $0.484 \pm 0.012$  | $0.639 \pm 0.014$ | $0.361 \pm 0.014$  |
| Winter-M    | $0.235 \pm 0.006$ | $0.765 \pm 0.006$ | $0.559 \pm 0.012$ | $0.441 \pm 0.012$ | $0.509 \pm 0.012$ | $0.491 \pm 0.012$  | $0.590 \pm 0.012$ | $0.410 \pm 0.012$  |
| Winter-L    | $0.291 \pm 0.007$ | $0.709 \pm 0.007$ | $0.574 \pm 0.012$ | $0.426 \pm 0.012$ | $0.504 \pm 0.011$ | $0.496 \pm 0.011$  | $0.627 \pm 0.013$ | $0.373 \pm 0.013$  |
| Spring-H    | $0.112 \pm 0.004$ | $0.888 \pm 0.004$ | $0.490 \pm 0.011$ | $0.510 \pm 0.011$ | $0.468 \pm 0.011$ | $0.532 \pm 0.011$  | $0.495 \pm 0.010$ | $0.505 \pm 0.010$  |
| Spring-M    | $0.132 \pm 0.006$ | $0.868 \pm 0.006$ | $0.487 \pm 0.011$ | $0.513 \pm 0.011$ | $0.410 \pm 0.010$ | $0.590 \pm 0.010$  | $0.525 \pm 0.011$ | $0.475 \pm 0.011$  |
| Spring-L    | $0.167 \pm 0.005$ | $0.833 \pm 0.005$ | $0.511 \pm 0.011$ | $0.489 \pm 0.011$ | $0.406 \pm 0.010$ | $0.594 \pm 0.010$  | $0.578 \pm 0.014$ | $0.422 \pm 0.014$  |
| Summer-H    | $0.144 \pm 0.005$ | $0.856 \pm 0.005$ | $0.504 \pm 0.011$ | $0.496 \pm 0.011$ | $0.399 \pm 0.009$ | $0.601 \pm 0.009$  | $0.550 \pm 0.012$ | $0.450 \pm 0.012$  |
| Summer-M    | $0.173 \pm 0.005$ | $0.827 \pm 0.005$ | $0.544 \pm 0.012$ | $0.456 \pm 0.012$ | $0.454 \pm 0.010$ | $0.546 \pm 0.010$  | $0.591 \pm 0.013$ | $0.409 \pm 0.013$  |
| Summer-L    | $0.165 \pm 0.006$ | $0.835 \pm 0.006$ | $0.585 \pm 0.012$ | $0.415 \pm 0.012$ | $0.359 \pm 0.009$ | $0.641 \pm 0.009$  | $0.720 \pm 0.019$ | $0.280 \pm 0.019$  |
| Autumn-H    | $0.153 \pm 0.005$ | $0.847 \pm 0.005$ | $0.516 \pm 0.011$ | $0.484 \pm 0.011$ | $0.470 \pm 0.011$ | $0.530 \pm 0.011$  | $0.545 \pm 0.011$ | $0.455 \pm 0.011$  |
| Autumn-M    | $0.140 \pm 0.004$ | $0.860 \pm 0.004$ | $0.502 \pm 0.011$ | $0.498 \pm 0.011$ | $0.448 \pm 0.010$ | $0.552 \pm 0.010$  | $0.534 \pm 0.011$ | $0.466 \pm 0.011$  |
| Autumn-L    | $0.177 \pm 0.005$ | $0.823 \pm 0.005$ | $0.544 \pm 0.012$ | $0.456 \pm 0.012$ | $0.472 \pm 0.011$ | $0.528 \pm 0.011$  | $0.578 \pm 0.012$ | $0.422 \pm 0.012$  |

76

77 **Table S4S3.** Concentrations of EC, OC, WIOC and WSOC from non-fossil sources ( $EC_{bb}$ ,  $OC_{nf}$ ,  $WIOC_{nf}$  and  $WSOC_{nf}$ ) and fossil sources ( $EC_{fossil}$ ,  
 78  $OC_{fossil}$ ,  $WIOC_{fossil}$  and  $WSOC_{fossil}$ ) in units of  $\mu\text{g m}^{-3}$  for each sample.

| Sample name | $EC_{bb}$       | $EC_{fossil}$   | $OC_{nf}$        | $OC_{fossil}$    | $WIOC_{nf}$      | $WIOC_{fossil}$  | $WSOC_{nf}$      | $WSOC_{fossil}$ |
|-------------|-----------------|-----------------|------------------|------------------|------------------|------------------|------------------|-----------------|
| Winter-H    | $3.08 \pm 0.18$ | $6.86 \pm 0.39$ | $27.66 \pm 1.56$ | $19.43 \pm 1.20$ | $10.78 \pm 0.78$ | $10.12 \pm 0.74$ | $16.72 \pm 1.82$ | $9.43 \pm 1.08$ |
| Winter-M    | $1.44 \pm 0.09$ | $4.70 \pm 0.28$ | $21.17 \pm 1.17$ | $16.73 \pm 0.97$ | $8.25 \pm 0.62$  | $7.95 \pm 0.59$  | $12.80 \pm 1.36$ | $8.89 \pm 0.96$ |
| Winter-L    | $0.82 \pm 0.06$ | $1.99 \pm 0.14$ | $8.31 \pm 0.48$  | $6.16 \pm 0.37$  | $3.33 \pm 0.17$  | $3.27 \pm 0.17$  | $4.95 \pm 0.53$  | $2.94 \pm 0.32$ |
| Spring-H    | $0.36 \pm 0.03$ | $2.86 \pm 0.19$ | $5.62 \pm 0.33$  | $5.85 \pm 0.34$  | $1.56 \pm 0.08$  | $1.77 \pm 0.09$  | $4.03 \pm 0.33$  | $4.12 \pm 0.34$ |
| Spring-M    | $0.30 \pm 0.03$ | $2.00 \pm 0.15$ | $3.68 \pm 0.22$  | $3.87 \pm 0.23$  | $1.08 \pm 0.06$  | $1.56 \pm 0.08$  | $2.58 \pm 0.24$  | $2.34 \pm 0.22$ |
| Spring-L    | $0.22 \pm 0.02$ | $1.09 \pm 0.10$ | $2.48 \pm 0.16$  | $2.37 \pm 0.15$  | $0.79 \pm 0.06$  | $1.15 \pm 0.09$  | $1.68 \pm 0.19$  | $1.23 \pm 0.14$ |
| Summer-H    | $0.32 \pm 0.03$ | $1.88 \pm 0.14$ | $3.71 \pm 0.23$  | $3.65 \pm 0.22$  | $0.94 \pm 0.08$  | $1.41 \pm 0.11$  | $2.75 \pm 0.26$  | $2.25 \pm 0.21$ |
| Summer-M    | $0.17 \pm 0.02$ | $0.83 \pm 0.08$ | $2.25 \pm 0.15$  | $1.89 \pm 0.13$  | $0.68 \pm 0.06$  | $0.82 \pm 0.07$  | $1.55 \pm 0.17$  | $1.07 \pm 0.12$ |
| Summer-L    | $0.12 \pm 0.02$ | $0.60 \pm 0.07$ | $1.96 \pm 0.14$  | $1.39 \pm 0.10$  | $0.46 \pm 0.03$  | $0.82 \pm 0.05$  | $1.49 \pm 0.17$  | $0.58 \pm 0.08$ |
| Autumn-H    | $1.05 \pm 0.07$ | $5.79 \pm 0.33$ | $12.05 \pm 0.68$ | $11.32 \pm 0.64$ | $4.77 \pm 0.22$  | $5.37 \pm 0.24$  | $7.22 \pm 0.72$  | $6.03 \pm 0.61$ |
| Autumn-M    | $0.54 \pm 0.04$ | $3.29 \pm 0.21$ | $5.88 \pm 0.35$  | $5.83 \pm 0.35$  | $2.13 \pm 0.15$  | $2.62 \pm 0.18$  | $3.71 \pm 0.38$  | $3.24 \pm 0.34$ |
| Autumn-L    | $0.28 \pm 0.02$ | $1.29 \pm 0.11$ | $3.29 \pm 0.21$  | $2.76 \pm 0.18$  | $0.99 \pm 0.07$  | $1.11 \pm 0.08$  | $2.29 \pm 0.23$  | $1.67 \pm 0.17$ |

79



80 **Table S5S4.** Concentrations ( $\mu\text{g m}^{-3}$ ) of primary OC from biomass burning ( $\text{POC}_{\text{bb}}$ ), OC from non-  
81 fossil sources excluding primary biomass burning ( $\text{OC}_{\text{o,nf}}$ ), primary OC from fossil sources  
82 ( $\text{POC}_{\text{fossil}}$ ), secondary OC from fossil sources ( $\text{SOC}_{\text{fossil}}$ ) (median and interquartile range). The  
83 median values for  $\text{POC}_{\text{bb}}$  and  $\text{OC}_{\text{o,nf}}$  are very close to their mean values due to their symmetric  
84 PDFs (Fig. S3b).

| Sample Name | $\text{POC}_{\text{bb}}$ | $\text{OC}_{\text{o,nf}}$ | $\text{POC}_{\text{fossil}}$ | $\text{SOC}_{\text{fossil}}$ |
|-------------|--------------------------|---------------------------|------------------------------|------------------------------|
| Winter-H    | 12.27<br>(11.26–13.37)   | 15.34<br>(13.87–16.78)    | 9.24<br>(7.52–11.64)         | 10.10<br>(7.64–11.97)        |
| Winter-M    | 5.77<br>(5.26–6.27)      | 15.37<br>(14.45–16.29)    | 5.99<br>(4.95–7.70)          | 10.55<br>(8.92–11.84)        |
| Winter-L    | 3.26<br>(2.98–3.55)      | 5.03<br>(4.61–5.46)       | 2.69<br>(2.19–3.39)          | 3.42<br>(2.73–3.99)          |
| Spring-H    | 1.44<br>(1.31–1.58)      | 4.17<br>(3.92–4.42)       | 3.87<br>(3.05–5.05)          | 1.97<br>(0.81–2.77)          |
| Spring-M    | 1.22<br>(1.11–1.33)      | 2.46<br>(2.27–2.64)       | 2.58<br>(2.10–3.34)          | 1.28<br>(0.52–1.77)          |
| Spring-L    | 0.87<br>(0.79–0.96)      | 1.60<br>(1.46–1.74)       | 1.58<br>(1.25–1.98)          | 0.77<br>(0.38–1.12)          |
| Summer-H    | 1.26<br>(1.15–1.38)      | 2.45<br>(2.26–2.64)       | 2.49<br>(2.00–3.22)          | 1.15<br>(0.42–1.66)          |
| Summer-M    | 0.69<br>(0.62–0.77)      | 1.55<br>(1.43–1.67)       | 1.00<br>(0.84–1.25)          | 0.87<br>(0.60–1.06)          |
| Summer-L    | 0.47<br>(0.42–0.53)      | 1.48<br>(1.38–1.59)       | 0.76<br>(0.62–0.98)          | 0.62<br>(0.40–0.78)          |
| Autumn-H    | 4.20<br>(3.84–4.56)      | 7.88<br>(7.30–8.45)       | 7.07<br>(5.93–9.06)          | 4.21<br>(2.21–5.43)          |
| Autumn-M    | 2.14<br>(1.96–2.34)      | 3.73<br>(3.43–4.03)       | 3.75<br>(3.23–4.78)          | 2.02<br>(0.99–2.61)          |
| Autumn-L    | 1.11<br>(1.00–1.22)      | 2.18<br>(2.01–2.35)       | 1.61<br>(1.34–2.05)          | 1.13<br>(0.68–1.43)          |

85

86 **Table S6S5.** Relative non-fossil sources contribution to EC, OC, WIOC and WSOC ( $f_{bb}(EC)$ ,  $f_{nf}(OC)$ ,  $f_{nf}(WIOC)$ ,  $f_{nf}(WSOC)$ ), and relative fossil  
 87 sources contribution to EC, OC, WIOC and WSOC ( $f_{fossil}(EC)$ ,  $f_{fossil}(OC)$ ,  $f_{fossil}(WIOC)$ ,  $f_{fossil}(WSOC)$ ) in different seasons and throughout the year.

| Season | $f_{bb}(EC)$      | $f_{fossil}(EC)$  | $f_{nf}(OC)$      | $f_{fossil}(OC)$  | $f_{nf}(WIOC)$    | $f_{fossil}(WIOC)$ | $f_{nf}(WSOC)$    | $f_{fossil}(WSOC)$ |
|--------|-------------------|-------------------|-------------------|-------------------|-------------------|--------------------|-------------------|--------------------|
| Winter | $0.279 \pm 0.039$ | $0.721 \pm 0.039$ | $0.573 \pm 0.014$ | $0.427 \pm 0.014$ | $0.510 \pm 0.006$ | $0.490 \pm 0.006$  | $0.619 \pm 0.026$ | $0.381 \pm 0.026$  |
| Spring | $0.137 \pm 0.028$ | $0.863 \pm 0.028$ | $0.496 \pm 0.013$ | $0.504 \pm 0.013$ | $0.428 \pm 0.035$ | $0.572 \pm 0.035$  | $0.533 \pm 0.042$ | $0.467 \pm 0.042$  |
| Summer | $0.161 \pm 0.015$ | $0.839 \pm 0.015$ | $0.544 \pm 0.040$ | $0.456 \pm 0.040$ | $0.404 \pm 0.047$ | $0.596 \pm 0.047$  | $0.620 \pm 0.089$ | $0.380 \pm 0.089$  |
| Autumn | $0.157 \pm 0.019$ | $0.843 \pm 0.019$ | $0.521 \pm 0.021$ | $0.479 \pm 0.021$ | $0.464 \pm 0.013$ | $0.536 \pm 0.013$  | $0.552 \pm 0.023$ | $0.448 \pm 0.023$  |
| Annual | $0.183 \pm 0.062$ | $0.817 \pm 0.062$ | $0.534 \pm 0.037$ | $0.466 \pm 0.037$ | $0.451 \pm 0.049$ | $0.549 \pm 0.049$  | $0.581 \pm 0.060$ | $0.419 \pm 0.060$  |

88

89 **Table S7S6.** Concentrations of EC, OC, WIOC and WSOC from non-fossil sources (EC<sub>bb</sub>, OC<sub>nf</sub>, WIOC<sub>nf</sub> and WSOC<sub>nf</sub>) and fossil sources (EC<sub>fossil</sub>,  
 90 OC<sub>fossil</sub>, WIOC<sub>fossil</sub> and WSOC<sub>fossil</sub>) in units of  $\mu\text{g m}^{-3}$  in different seasons and throughout the year.

| Season | EC <sub>bb</sub> | EC <sub>fossil</sub> | OC <sub>nf</sub> | OC <sub>fossil</sub> | WIOC <sub>nf</sub> | WIOC <sub>fossil</sub> | WSOC <sub>nf</sub> | WSOC <sub>fossil</sub> |
|--------|------------------|----------------------|------------------|----------------------|--------------------|------------------------|--------------------|------------------------|
| Winter | 1.78 ± 1.17      | 4.52 ± 2.44          | 19.05 ± 9.85     | 14.11 ± 7.01         | 7.45 ± 3.79        | 7.11 ± 3.50            | 11.49 ± 5.99       | 7.09 ± 3.60            |
| Spring | 0.29 ± 0.07      | 1.98 ± 0.89          | 3.93 ± 1.58      | 4.03 ± 1.75          | 1.14 ± 0.39        | 1.49 ± 0.31            | 2.76 ± 1.18        | 2.56 ± 1.46            |
| Summer | 0.20 ± 0.10      | 1.10 ± 0.68          | 2.64 ± 0.94      | 2.31 ± 1.19          | 0.69 ± 0.24        | 1.02 ± 0.34            | 1.93 ± 0.71        | 1.30 ± 0.86            |
| Autumn | 0.62 ± 0.39      | 3.46 ± 2.25          | 7.07 ± 4.50      | 6.64 ± 4.34          | 2.63 ± 1.94        | 3.03 ± 2.16            | 4.41 ± 2.54        | 3.65 ± 2.21            |
| Annual | 0.72 ± 0.84      | 2.76 ± 2.03          | 8.17 ± 8.23      | 6.77 ± 5.94          | 2.98 ± 3.34        | 3.16 ± 3.06            | 5.15 ± 4.85        | 3.65 ± 2.97            |

91

92 **Table S8S7.** Fractional contribution of different incomplete combustion sources to EC in different  
 93 seasons (median, interquartile range (25th-75th percentile)).

| Sources                          |                      | Winter      | Spring      | Summer      | Autumn      |
|----------------------------------|----------------------|-------------|-------------|-------------|-------------|
| Biomass<br>burning               | median               | 0.28        | 0.146       | 0.163       | 0.159       |
|                                  | 25th-75th percentile | (0.26–0.31) | (0.13–0.17) | (0.15–0.18) | (0.15–0.18) |
| Coal<br>combustion               | median               | 0.246       | 0.296       | 0.227       | 0.19        |
|                                  | 25th-75th percentile | (0.13–0.41) | (0.15–0.50) | (0.11–0.41) | (0.09–0.36) |
| Liquid fossil<br>fuel combustion | median               | 0.459       | 0.534       | 0.598       | 0.638       |
|                                  | 25th-75th percentile | (0.29–0.59) | (0.33–0.69) | (0.41–0.72) | (0.45–0.74) |

94

95 **Table S9S8.** EC concentrations (in unit of  $\mu\text{g m}^{-3}$ ) from biomass burning ( $\text{EC}_{\text{bb}}$ ), coal combustion  
 96 ( $\text{EC}_{\text{coal}}$ ) and liquid fossil fuel combustion ( $\text{EC}_{\text{liq.fossil}}$ ) for each sample (median and interquartile  
 97 range in unit of  $\mu\text{g m}^{-3}$ ), and the seasonal averaged concentrations ( $\mu\text{g m}^{-3}$ ) calculated by averaging  
 98 the median values for each sample in each season<sup>a</sup>.

|                     | $\text{EC}_{\text{bb}}$ |                       | $\text{EC}_{\text{coal}}$ |                       | $\text{EC}_{\text{liq.fossil}}$ |                       |
|---------------------|-------------------------|-----------------------|---------------------------|-----------------------|---------------------------------|-----------------------|
|                     | median                  | (interquartile range) | median                    | (interquartile range) | median                          | (interquartile range) |
| Winter-H            | 3.07                    | (2.94–3.22)           | 2.79                      | (1.43–4.51)           | 4.03                            | (2.32–5.42)           |
| Winter-M            | 1.44                    | (1.38–1.52)           | 1.42                      | (0.67–2.60)           | 3.25                            | (2.07–4.00)           |
| Winter-L            | 0.82                    | (0.77–0.86)           | 0.69                      | (0.36–1.18)           | 1.28                            | (0.80–1.62)           |
| Spring-H            | 0.36                    | (0.34–0.38)           | 1.02                      | (0.44–1.90)           | 1.81                            | (0.94–2.39)           |
| Spring-M            | 0.30                    | (0.29–0.32)           | 0.70                      | (0.31–1.30)           | 1.29                            | (0.69–1.67)           |
| Spring-L            | 0.22                    | (0.21–0.23)           | 0.50                      | (0.24–0.79)           | 0.57                            | (0.29–0.84)           |
| Summer-H            | 0.32                    | (0.30–0.34)           | 0.66                      | (0.30–1.20)           | 1.20                            | (0.66–1.55)           |
| Summer-M            | 0.17                    | (0.16–0.19)           | 0.20                      | (0.10–0.39)           | 0.61                            | (0.43–0.72)           |
| Summer-L            | 0.12                    | (0.11–0.13)           | 0.16                      | (0.08–0.32)           | 0.42                            | (0.28–0.52)           |
| Autumn-H            | 1.05                    | (1.00–1.10)           | 1.46                      | (0.68–2.99)           | 4.29                            | (2.80–5.08)           |
| Autumn-M            | 0.54                    | (0.51–0.56)           | 0.68                      | (0.33–1.33)           | 2.58                            | (1.94–2.94)           |
| Autumn-L            | 0.28                    | (0.26–0.29)           | 0.37                      | (0.18–0.68)           | 0.91                            | (0.60–1.11)           |
| Winter <sup>a</sup> | 1.78 ± 1.16             |                       | 1.63 ± 1.06               |                       | 2.86 ± 1.42                     |                       |
| Spring <sup>a</sup> | 0.30 ± 0.07             |                       | 0.74 ± 0.26               |                       | 1.23 ± 0.62                     |                       |
| Summer <sup>a</sup> | 0.20 ± 0.10             |                       | 0.34 ± 0.28               |                       | 0.75 ± 0.41                     |                       |
| Autumn <sup>a</sup> | 0.62 ± 0.39             |                       | 0.84 ± 0.57               |                       | 2.59 ± 1.69                     |                       |

99 <sup>a</sup>The seasonal averaged concentrations calculated by averaging the median values for each sample  
 100 in each season.

101  
102  
103  
104  
105  
106  
107  
108

**References**

[Chow, J. C., Watson, J. G., Chen, L.-W. A., Chang, M. O., Robinson, N. F., Trimble, D., and Kohl, S.: The IMPROVE A temperature protocol for thermal/optical carbon analysis: maintaining consistency with a long-term database, \*J. Air Waste Manage.\*, 57, 1014–1023, 2007.](#)

[Zhao, Z., Cao, J., Zhang, T., Shen, Z., Ni, H., Tian, J., Wang, Q., Liu, S., Zhou, J., Gu, J., and Shen, G.: Stable carbon isotopes and levoglucosan for PM<sub>2.5</sub> elemental carbon source apportionments in the largest city of Northwest China, \*Atmos. Environ.\*, 185, 253-261, <https://doi.org/10.1016/j.atmosenv.2018.05.008>, 2018.](#)
